27 **Abstract**

28 Endoplasmic reticulum (ER) and plasma membrane (PM) form junctions crucial to ion and lipid  
29 signaling and homeostasis. The Kv2.1 ion channel is unique among PM proteins in organizing  
30 ER-PM junctions. Here, we show that this organizing function is conserved between Kv2 family  
31 members that differ in their biophysical properties, modulation and cellular expression.  
32 Manipulation of actin cytoskeleton surrounding Kv2 ER-PM junctions affects their spatial  
33 organization. Kv2-containing ER-PM junctions overlap with those formed by canonical ER-PM  
34 tethers. ER-PM junction organization by Kv2 channels is unchanged by point mutations that  
35 eliminate ion conduction, but abolished by those that eliminate PM clustering without impacting  
36 ion channel function. Kv2.2 is distinct in lacking the reversible modulation of junction organization  
37 present in Kv2.1. Brain neurons in Kv2 double knockout mice have altered ER-PM junctions,  
38 demonstrating a conserved *in vivo* function for Kv2 family members distinct from their canonical  
39 role as ion-conducting channels shaping neuronal excitability.

40

## 41 **Introduction**

42 Membrane contacts between the endoplasmic reticulum (ER) and plasma membrane (PM), or  
43 ER-PM junctions, are a ubiquitous feature of eukaryotic cells (1-4). These specialized sites at  
44 which ER is held in close apposition (10-30 nm) to the PM represent critical platforms for  
45 mediating ER and PM lipid metabolism and transport and as hubs for Ca<sup>2+</sup> homeostasis and  
46 signaling events (5, 6). ER-PM junctions are classified according to the resident ER protein  
47 serving as the PM tether and that are members of the Extended Synaptotagmin or E-Syt (7),  
48 Junctophilin or JP (8), or the Stromal Interacting Molecule or STIM (9) families. These otherwise  
49 unrelated ER membrane proteins have a common membrane topology with a large cytoplasmic  
50 domain that mediates binding to specific classes of phospholipids in the inner leaflet of the PM  
51 (1, 10). The STIM proteins can also reversibly bind to PM Orai proteins in a process triggered by  
52 ER Ca<sup>2+</sup> depletion (9). While mRNA measurements have shown that many of these ER-localized  
53 tethering proteins have high levels of expression in brain [e.g., (8, 11-13)], little is known of the  
54 subcellular localization of these proteins relative to the different classes of ER-PM junctions that  
55 have been observed in ultrastructural studies of brain neurons (14-16).

56 Plasma membrane voltage-gated K<sup>+</sup> or Kv channels play crucial yet diverse roles in  
57 shaping neuronal function (17). Among these, the Kv2 family contains two members: Kv2.1 and  
58 Kv2.2. Like other Kv channels, Kv2.1 and Kv2.2 are key determinants of action potential  
59 characteristics and intrinsic electrical excitability in distinct classes of mammalian brain neurons  
60 (18-25), and *de novo* mutations in Kv2.1 are associated with devastating neonatal  
61 encephalopathic epilepsies and neurodevelopmental delays (26-29). Kv2 channels are also  
62 prominently yet differentially expressed in pancreatic islets (30, 31), smooth muscle cells (32, 33),  
63 and other excitable and non-excitable cell types. In brain neurons, Kv2 channels are distinct from  
64 other Kv channels (17) in being specifically localized to high-density micron sized clusters  
65 prominent on the soma, proximal dendrites, and axon initial segment (34-42). Kv2 channels also  
66 form such clusters when exogenously expressed in cultured neurons and in heterologous cells

67 (35, 37, 39, 41-47). A short proximal restriction and clustering (PRC) motif in the relatively large  
68 cytoplasmic C-terminus of Kv2.1 is necessary for its clustered localization in neurons and  
69 heterologous cells (35, 37), and is sufficient to transfer Kv2.1-like clustering to other Kv channels  
70 (37, 45). Mutations within the PRC motif in Kv2.2 result in loss of Kv2.2 clustering (39).

71       Immunoelectron microscopy-based studies have shown that immunoreactivity for PM  
72 Kv2.1 (38, 40, 41) and Kv2.2 (39) are associated with subsurface cisternae, a form of ER-PM  
73 junctions that are prominent in somata of brain neurons (14-16). In certain brain neurons, clusters  
74 of PM Kv2.1 channels overlay clusters of ER-localized ryanodine receptor (RyR) Ca<sup>2+</sup> release  
75 channels (38, 48) which are concentrated at ER-PM junctions to mediate local Ca<sup>2+</sup> signaling  
76 events in diverse cell types (49, 50). Recent studies revealed that in addition to being localized to  
77 ER-PM junctions, exogenous expression of Kv2.1 leads to recruitment and/or stabilization of ER-  
78 PM junctions in heterologous cells and cultured hippocampal neurons or CHNs (51). The ability  
79 of Kv2.1 to organize ER-PM junctions exhibits the same phosphorylation-dependent regulation  
80 as Kv2.1 clustering (47), which is regulated by numerous stimuli that impact Kv2.1  
81 phosphorylation state (39, 41, 52-54). It is not known whether the changes in ER-PM junction  
82 structure upon heterologous expression of Kv2.1 are a result of the channel's K<sup>+</sup> conductance  
83 with a subsequent impact on membrane potential or K<sup>+</sup> concentration, or whether it is through a  
84 more direct structural role. Kv2.1 and Kv2.2 share 61% overall amino acid identity (39% in their  
85 respective cytoplasmic C-termini that comprises about half of their primary structure), and have  
86 distinct biophysical properties [e.g., (55, 56)] and expression patterns [e.g., (18, 31, 39, 41, 57-  
87 59)]. Moreover, stimuli that trigger reversible modulation of voltage activation [e.g., (38, 39, 56)]  
88 and dispersal of clustering (39) of Kv2.1 do not detectably impact Kv2.2, leading to questions as  
89 to whether Kv2.2 is also distinct from Kv2.1 in its ability to organize ER-PM junctions. Lastly, it is  
90 not known whether altering expression of endogenous Kv2 channels affects ER-PM junctions in  
91 brain neurons *in situ*. Here, we define the localization of Kv2.2 relative to ER-PM junctions in brain  
92 neurons *in situ* and in culture and determine its role in organizing ER-PM junctions. We determine

93 the relationship of Kv2-containing ER-PM junctions to the actin cytoskeleton and to other classes  
94 of molecular-defined ER-PM junctions. We employ a strategic set of point mutations in Kv2.2 to  
95 separately determine the contributions of K<sup>+</sup> conduction and clustering to the remodeling of  
96 neuronal ER-PM junctions. We also determine how the differential regulation of Kv2.1 and Kv2.2  
97 clustering impacts the associated ER-PM junctions. Finally, we use recently generated double  
98 knockout mice lacking expression of both mammalian Kv2 channel family members to determine  
99 their *in vivo* role in organizing ER-PM junctions in brain neurons *in situ*. Our results provide  
100 compelling evidence for a conserved role for nonconducting Kv2 channels in organizing ER-PM  
101 junctions in brain neurons and other cell types in which these ion channels are abundantly  
102 expressed.

103

104

## 105 **Results**

106

### 107 **Plasma membrane clusters of Kv2.2 associate with ER-PM junctions in mammalian brain** 108 **neurons *in situ* and in culture, and in heterologous HEK293T cells.**

109 Kv2.2 is present in clusters on the soma, proximal dendrites and axon initial segments of  
110 mammalian brain neurons (39, 41, 42). To investigate the subcellular localization of these Kv2.2  
111 clusters relative to native ER-PM junctions in brain neurons, we performed multiplex  
112 immunofluorescence labeling for PM Kv2.2 and ER-localized RyR Ca<sup>2+</sup> release channels, which  
113 are concentrated at ER-PM junctions. In mouse brain sections, somatic Kv2.2 clusters were found  
114 at/near RyR clusters in specific neuron types, including hippocampal CA1 pyramidal neurons and  
115 layer 6 neocortical neurons (Figure 1). A similar juxtaposition of Kv2.2 and RyR clusters was seen  
116 in CHNs (Figure 1). In these classes of neurons, Kv2.2 was often found coclustered with Kv2.1 at  
117 these ER-PM junctions (Figure 1). Neurons in each preparation also contained RyR clusters that  
118 did not appear to colocalize with Kv2.2 or Kv2.1 (Figure 1). These findings demonstrate that Kv2.2

119 clusters localize to RyR-containing ER-PM junctions in intact mammalian brain neurons *in situ*  
120 and in culture.

121 We next determined whether heterologously expressed and clustered Kv2.2 localizes  
122 more generally to ER-PM junctions. In HEK293T cells coexpressing GFP-tagged Kv2.2 and BFP-  
123 tagged SEC61 $\beta$  [a general ER marker; (60)], optical sections taken through the center of cells  
124 show fingerlike projections of SEC61 $\beta$ -positive ER, a subset of which were associated with PM  
125 Kv2.2 clusters, which appear as discrete PM segments (Figure 2). Three-dimensional  
126 reconstructions show that the ER projections terminating at Kv2.2-associated PM clusters were  
127 contiguous with bulk ER (Figure 2, Movie 1). Together these results suggest that Kv2.2 localizes  
128 to ER-PM junctions in mammalian brain neurons and when heterologously expressed in  
129 HEK293T cells.

130

131 **Kv2.2 expression organizes ER-PM junctions in cultured rat hippocampal neurons and**  
132 **heterologous cells.**

133 We next determined the impact of exogenous expression of recombinant Kv2.2 on ER-PM  
134 junctions in mammalian neurons and heterologous cells. We used Total Internal Reflection  
135 Fluorescence (TIRF) microscopy of living cells to selectively visualize fluorescence signals from  
136 ER and PM proteins localized within  $\approx$ 100 nm of the coverslip (*i.e.*, at ER-PM junctions). In  
137 HEK293T cells expressing the fluorescent luminal ER marker DsRed2-ER5 [a general ER marker;  
138 (61)], the near-PM ER appeared as a highly ramified system of small reticular tubules and puncta  
139 (Figure 3), the latter representing focal structures of cortical ER coincident with the PM or ER-PM  
140 junctions (51, 62). Expression of GFP-Kv2.2 led to a reorganization of the DsRed2-ER5-positive  
141 cortical ER to form larger foci that colocalized with the clusters of PM-localized Kv2.2 (Figure 3).  
142 Cells co-expressing GFP-Kv2.2 exhibited a significant increase in both the size of ER-PM  
143 junctions (Figure 3; Figure 3-Table 1) and the percentage of basal cell surface area with  
144 associated cortical ER (Figure 3; Figure 3-Table 2). No such changes were seen in cells

145 expressing the Kv channel Kv1.4 (Figure 3; Figure 3-Tables 1, 2). Analysis of colocalization using  
146 Pearson's Correlation Coefficient (PCC) measurements revealed that DsRed2-ER5 was  
147 significantly more colocalized with Kv2.2 than it was with Kv1.4 (Figure 3; Figure 3-Table 3). We  
148 also found a nearly linear relationship between Kv2.2 cluster size and ER-PM junction size (Figure  
149 4). As previously reported (51), significant increases in ER-PM junction size and ER-associated  
150 PM surface area were also observed in cells expressing Kv2.1 (Figure 3). Taken together, these  
151 data demonstrate that Kv2.2 can reorganize ER-PM junctions, and that this is a conserved  
152 function of Kv2 channels not shared with Kv1.4.

153 We next expressed DsRed2-ER5 alone or coexpressed DsRed2-ER5 with GFP-Kv2.2 in  
154 CHNs. TIRF imaging experiments revealed that GFP-Kv2.2 expression remodeled neuronal ER-  
155 PM junctions (Figure 4). Similar to HEK293T cells, we found a nearly linear relationship between  
156 Kv2.2 cluster size and ER-PM junction size in CHNs (Figure 4). These results demonstrate that  
157 expression of Kv2.2 in both HEK293T cells and CHNs is sufficient to remodel ER-PM junctions.

158

### 159 **Kv2.2 channels associated with ER-PM junctions are on the cell surface.**

160 Given the extensive colocalization of Kv2.2 and these ER markers at ER-PM junctions, we further  
161 addressed whether the Kv2.2 present at these sites was in the PM. We employed live cell labeling  
162 with the Kv2-specific tarantula toxin Guangxitoxin-1E (63) conjugated to DyLight633 [GxTX-633;  
163 (64)] to label cell surface Kv2.2. We first validated this approach by coexpressing BFP-SEC61 $\beta$   
164 with SEP-Kv2.1, a construct of Kv2.1 tagged with cytoplasmic mCherry and an extracellular  
165 pHluorin as a reporter of cell surface Kv2.1 (65). We observed extensive colocalization of GxTX-  
166 633 and pHluorin signals (Figure 5-figure supplement 1), showing that GxTX-633 is a reliable  
167 reporter for cell surface Kv2 channels. No detectable GxTX-633 labeling was observed in control  
168 HEK293T cells, or those expressing DsRed2-ER5 alone (data not shown). GxTX-633 labeling of  
169 cells coexpressing GFP-Kv2.2 and DsRed2-ER5 showed a high degree of colocalization of all  
170 three signals (Figure 5). As expected, PCC measurements (Figure 5) were slightly but significantly

171 higher for direct labeling of Kv2.2 with GxTX than for indirect labeling of ER-PM junctions with  
172 GxTX (Figure 5-Table 1). Similar results were obtained for GxTX labeling of cells coexpressing  
173 SEP-Kv2.1 and Sec61 $\beta$  (Figure 5-figure supplement 1, Figure 5-Table 1). Taken together, these  
174 data demonstrate that the Kv2 clusters associated with ER-PM junctions are on the cell surface.

175

176 **Kv2.2-containing ER-PM junctions are present at sites depleted in components of the**  
177 **cortical actin cytoskeleton.**

178 Kv2.2 is expressed in large clusters in brain neurons, including on the axon initial segment  
179 or AIS (18, 66), a subcellular compartment highly enriched for components of the actin cortical  
180 cytoskeleton including a specialized complex of spectrins and ankyrins (67). We immunolabeled  
181 brain sections for Kv2.2 and ankyrinG (ankG), which is highly expressed at the AIS. We found  
182 that in neocortical layer 5 pyramidal neurons, in addition to the somatodendritic labeling shown  
183 for Kv2.2 in Figure 1, Kv2.2 was also present in robust clusters on the AIS (Figure 6). The AIS  
184 clusters of Kv2.2 in these neurons were found at sites deficient in ankG (Figure 6). These ankG-  
185 deficient sites represent locations at which the ER present in the AIS, termed the cisternal  
186 organelle, comes into close apposition to the PM (68-70).

187 We next immunolabeled for endogenous Kv2.2 and ankG in CHNs and found a similar  
188 relationship between the sites of Kv2.2 clustering on the AIS and regions deficient in both ankG  
189 and filamentous actin, the latter labeled with fluorescent phalloidin (Figure 6). This is apparent in  
190 line scan analyses, which revealed that the intensity profiles of the Kv2 immunolabeling and actin  
191 labeling were often negatively correlated (Figure 6). To determine whether this spatial relationship  
192 is also present in non-neuronal cells, we performed TIRF imaging on live HEK293T cells  
193 coexpressing GFP-Kv2.2, BFP-SEC61 $\beta$  and mCherry-tagged actin. We found that GFP-Kv2.2  
194 clusters and associated ER-PM junctions displayed a negatively correlated distribution with  
195 respect to cortical mCherry-actin (Figure 6). Kv2.1 clusters and associated ER-PM junctions  
196 exhibited a similar negative relationship to the cortical actin cytoskeleton (Figure 6-figure



197 supplement 1). The negative values of PCC measurements between either of the Kv2 channels  
198 and mCherry-actin confirmed this (Figure 6; Figure 6-Table 1). We additionally coexpressed  
199 ankG-mCherry with BFP-SEC61 $\beta$  and either Kv2.2, or Kv2.1, and again found a negatively  
200 correlated distribution of the Kv2 channel clusters and associated ER-PM junctions with this actin-  
201 associated protein (Figure 6, Figure 6-figure supplement 1). PCC measurements show that  
202 neither Kv2.2 nor Kv2.1 colocalized with cortical ankG-mCherry (Figure 6, Figure 6-Table 1).

203

204 **The actin cytoskeleton regulates the organization of Kv2.2 clusters and associated ER-PM**  
205 **junctions.**

206 Given the distinct spatial relationship between Kv2.2-associated ER-PM junctions and the cortical  
207 actin cytoskeleton, we next determined the impact of disrupting the organization of the actin  
208 cytoskeleton on characteristics of Kv2.2-mediated ER-PM junctions. We treated cells expressing  
209 Kv2.2 with Latrunculin A (LatA) which disrupts the organization of filamentous actin (71). We  
210 found LatA treatment led to a reorganization of Kv2.2 clusters and the associated ER-PM  
211 junctions (Figure 7), resulting in a significant increase in the size of both Kv2.2 clusters and ER-  
212 PM junctions (Figure 7; Figure 7-Table 1), the latter reported by the DsRed2-ER5 signal  
213 coincident with the PM. The total number of ER-PM junctions in Kv2.2-expressing cells was  
214 significantly reduced in response to LatA treatment (Figure 7; Figure 7-Table 2). Similar results  
215 were obtained upon LatA treatment of cells coexpressing GFP-Kv2.1 and DsRed2-ER5 (Figure  
216 7-figure supplement 1; Figure 7-Table 1), as suggested in a previous study (51). These changes  
217 were not observed in untreated cells over the course of 15 minutes (data not shown). While LatA  
218 treatment significantly altered the spatial characteristics of the Kv2.2 clusters and the Kv2.2-  
219 associated ER-PM junctions, the extent of colocalization between GFP-Kv2.2 and DsRed2-ER5  
220 was not significantly altered upon LatA treatment (Figure 7; Figure 7-Table 3). Similar results were  
221 obtained for Kv2.1 (Figure 7-figure supplement 1; Figure 7- Tables 2-3). These results show that  
222 while LatA induced an apparent fusion of Kv2 clusters and associated ER-PM junctions resulting

223 in fewer, larger structures, it did not affect their association *per se*. These results also suggest  
224 that the distinct and mutually exclusive localization of Kv2.2 clusters and components of the  
225 cortical actin cytoskeleton seen in brain neurons likely participates in the organization and  
226 maintenance of Kv2 clusters and the associated ER-PM junctions.

227

228 **Kv2.2-containing ER-PM junctions associate with ER-PM junctions formed by the known**  
229 **classes of ER-PM tethers.**

230 We next determined the relationship of Kv2.2 clusters and associated ER-PM junctions with the  
231 three other families of mammalian ER-localized ER-PM tethers. We coexpressed FP-tagged  
232 Kv2.2 and individual members of the E-Syt, JP and STIM families in HEK293T cells. In cells  
233 coexpressing the STIMs, we also induced Ca<sup>2+</sup> store depletion *via* treatment with 2 μM  
234 thapsigargin treatment for five minutes. In all cases, we observed a high degree of colocalization  
235 between clusters of Kv2.2 and these ER-PM junction tethers (Figure 8, Figure 8-figure  
236 supplements 1, 2), as demonstrated by high PCC and Mander's overlap coefficient (MOC) values  
237 (Figure 8-Table 1). In cells coexpressing STM1, Kv2.2 and Orai1, store depletion resulted in not  
238 only a significant increase in colocalization of STIM1 and Orai1, but also of Orai1 and Kv2.2  
239 (Figure 8-figure supplement 3; Figure 8-Table 4). The store depletion-induced increase in  
240 colocalization of Kv2.2 and Orai1 also occurred in the absence of STIM1 coexpression (Figure 8-  
241 figure supplement 3; Figure 8-Table 4), presumably due to endogenous STIM expression in  
242 HEK293T cells (72-75). Together, these results show that Kv2.2 clusters are associated with ER-  
243 PM junctions formed by the three established families of ER-PM junction tethers. Interestingly,  
244 the PCC values were significantly lower than the corresponding MOC values obtained from the  
245 same cells (Figure 8; Figure 8-Table 1), suggesting that despite the extensive overlap in signal  
246 between Kv2.2 clusters and these established classes of ER-PM junctions, there are distinctions  
247 in their fine spatial organization relative to one another. Kv2.1 also exhibited a high degree of

248 colocalization with these diverse ER-PM junction tethers (Figure 8-figure supplement 1, Figure 8-  
249 Table 3).

250 We further examined the relationship of Kv2-mediated ER-PM junctions to those  
251 previously characterized by acutely triggering ER-PM junction formation using a rapamycin-  
252 inducible system (76) employing ER-localized CB5-FKBP-CFP and PM-localized Lyn11-FRB  
253 (CB5/Lyn11). TIRF imaging reveals that acute treatment of HEK293T cells coexpressing  
254 CB5/Lyn11 with 5  $\mu$ M rapamycin yields robust recruitment of ER to the cell cortex (Figure 8-figure  
255 supplement 3). HEK293T cells coexpressing Kv2.2 and CB5/Lyn11 prior to rapamycin addition  
256 exhibited CB5-FKBP-CFP fluorescence similar to other ER reporters (*e.g.*, BFP-SEC61 $\beta$ ,  
257 DsRed2-ER5) in being throughout the ER, and also colocalized with clustered Kv2.2 at ER-PM  
258 junctions, the latter yielding a high degree of colocalization in TIRF imaging (Figure 8; Figure 8-  
259 Table 2). Surprisingly, unlike the other classes of ER-PM junctions, the rapamycin-induced  
260 CB5/Lyn11 ER-PM junctions were largely distinct and nonoverlapping from those associated with  
261 the Kv2.2 clusters (Figure 8), as shown by the significant decrease in PCC values upon rapamycin  
262 treatment (Figure 8; Figure 8-Table 2). Subsequent LatA treatment impacted the spatial  
263 organization of both the Kv2.2- and CB5/Lyn11-mediated ER-PM junctions (Figure 8). However,  
264 they remained spatially segregated such that there were no significant LatA-induced changes in  
265 PCC values between Kv2.2- and CB5 (Figure 8; Figure 8-Table 2). Similar results were obtained  
266 for Kv2.1 (Figure 8-figure supplement 4; Figure 8-Table 2). These results taken together  
267 demonstrate that despite the extensive colocalization observed between Kv2-associated ER-PM  
268 junctions and those formed by known ER-PM junction tethers, ER-PM junctions distinct from  
269 those mediated by Kv2 clustering can exist simultaneously in mammalian cells. Moreover, while  
270 the actin cytoskeleton plays a role in defining the spatial boundaries of both Kv2.2- and  
271 CB5/Lyn11-mediated ER-PM junctions, disrupting the actin cytoskeleton is not sufficient to  
272 homogenize these distinct membrane contact sites.

273

274 **Reorganization of cortical ER is a nonconducting function of Kv2.2.**

275 We next addressed whether the Kv2.2-mediated remodeling of ER-PM junctions is dependent on  
276 K<sup>+</sup> flux through the channels. We generated a point mutation (P412W) in the S6 transmembrane  
277 helix of Kv2.2 that is at the same relative position as a point mutation (P404W) that eliminates  
278 conductance through Kv2.1 channels heterologously expressed in *Xenopus* oocytes (77). We first  
279 expressed GFP-Kv2.2 P412W in HEK293T cells and evaluated conductance relative to wild-type  
280 GFP-Kv2.2 using voltage-clamp electrophysiology. HEK293T cells expressing GFP-Kv2 channels  
281 or GFP alone as a control were whole-cell patch clamped and held at a resting membrane  
282 potential of -80 mV. In response to positive voltage steps, delayed rectifier outward currents  
283 emerged from cells expressing GFP-Kv2.2, but not from cells expressing either GFP-Kv2.2  
284 P412W or GFP (Figure 9, Figure 9-Table 1). As expected from previous analyses in oocytes,  
285 GFP-Kv2.1 P404W was nonconducting when expressed in HEK293T cells (Figure 9-figure  
286 supplement 1, Figure 9-Table 1).

287 We next expressed GFP-Kv2.2 P412W in CHNs and found that it was localized in clusters  
288 indistinguishable from GFP-Kv2.2 (Figure 9). The size of GFP-Kv2.2 P412W clusters was not  
289 significantly different than those of GFP-Kv2.2 (Figure 9, Figure 9-Table 2). We used Coefficient  
290 of Variation (CV) of pixel intensity as a quantitative measure of nonuniformity imparted by  
291 clustering (39, 41, 47, 65). We found that CV values for GFP-Kv2.2 P412W expressed in CHNs  
292 were not significantly different than those for GFP-Kv2.2 (Figure 9; Figure 9-Table 3). We also  
293 found a lack of any significant differences in clustering of conducting GFP-Kv2.1 and  
294 nonconducting GFP-Kv2.1 P404W (Figure 9-figure supplement 1, Figure 9-Tables 2-3).

295 We next surface labeled live HEK293T cells with GxTX-633 and found no significant  
296 differences in colocalization between GxTX-633 and GFP-Kv2.2 *versus* GFP-Kv2.2 P412W  
297 (Figure 9; Figure 9-Table 4). A similar lack of significant differences was seen for GxTX labeling  
298 of GFP-Kv2.1 versus nonconducting GFP-Kv2.1 P404W (Figure 9-figure supplement 1, Figure 9-  
299 Table 4). These data taken together demonstrate that these Kv2 mutants lack ionic conductance

300 but exhibits cell surface expression and clustering indistinguishable from their wild-type  
301 counterparts.

302 We next addressed whether the clustered but nonconducting GFP-Kv2.2 P412W mutant  
303 retained its ability to recruit/stabilize cortical ER at ER-PM junctions. Live cell TIRF imaging  
304 showed that GFP-Kv2.2 P412W reorganized the DsRed2-ER5-labeled cortical ER into ER-PM  
305 junctions (Figure 10). We found no significant difference between cells expressing GFP-Kv2.2  
306 P412W versus GFP-Kv2.2 in either the size of ER-PM junctions (Figure 10; Figure 10-Table 1),  
307 or the surface area of the PM occupied by the cortical ER (Figure 10; Figure 10-Table 2). The  
308 extent of colocalization of DsRed2-ER5 with GFP-Kv2.2 P412W was also not significantly  
309 different than for GFP-Kv2.2 (Figure 10; Figure 10-Table 3). We next evaluated the lateral mobility  
310 of DsRed2-ER5-labeled cortical ER as an additional measure of its recruitment into ER-PM  
311 junctions (51, 78). The mobility of PM-associated ER was significantly reduced in Kv2.2-  
312 expressing cells compared to control cells expressing DsRed2-ER5 alone (Figure 10-figure  
313 supplement 2; Figure 10-Table 6). Cortical ER mobility was not significantly different in cells  
314 expressing the nonconducting Kv2.2 P412W mutant versus those expressing WT Kv2.2 (Figure  
315 10-figure supplement 2; Figure 10-Table 6). These parameters of cortical ER  
316 recruitment/stabilization were also not significantly different between WT Kv2.1 and the  
317 nonconducting Kv2.1 P404W mutant (Figure 10-figure supplements 1, 2, Figure 10-Tables1-4).  
318 These data taken together demonstrate that the function of Kv2 channels to localize to and  
319 organize ER-PM junctions is independent of their canonical ion conducting function and is instead  
320 a distinct nonconducting function.

321 We next determined whether Kv2.2 clustering is necessary for remodeling of ER-PM  
322 junctions. We used a point mutant in the cytoplasmic C-terminus of Kv2.2 (S605A) that abolishes  
323 its clustering (39). Based on analyses of C-terminal truncation mutants in Kv2.1 [*e.g.*, (35, 79)],  
324 we expected that this point mutant would not impact the ability of Kv2.2 to conduct K<sup>+</sup>. To verify  
325 this, we used whole cell patch clamp recordings to compare currents from wild-type and

326 nonclustered Kv2.2 channels in voltage clamped cells. We found that expression of GFP-Kv2.2  
327 S605A in HEK293T cells resulted in expression of voltage-activated outward currents (Figure 10).  
328 The conductance-voltage relationships of cells expressing GFP-Kv2.2 versus GFP-Kv2.2 S605A  
329 were not significantly different (Figure 10; Figure 10-Table 4), nor were those from GFP-Kv2.1  
330 versus GFP-Kv2.1 S586A (Figure 10-figure supplement 1; Figure 10-Tables 4). The K<sup>+</sup> current  
331 density was also not significantly altered by the point mutations that disrupt Kv2.2 clustering and  
332 association with ER-PM junctions. The whole cell K<sup>+</sup> current density from cells expressing GFP-  
333 Kv2.2 *versus* GFP-Kv2.2 S605A were not significantly different (Figure 10; Figure 10-Table 5),  
334 nor were those from cells expressing GFP-Kv2.1 versus GFP-Kv2.1 S586A (Figure 10-figure  
335 supplement 1; Figure 10-Table 5). Thus, these measurements of current density and the  
336 conductance-voltage relationship supports that Kv2 channels with these cytoplasmic point  
337 mutations that disrupt clustering do not affect the density of conducting channels on the cell  
338 surface or their gating.

339 Finally, we determined the function of the nonclustering but conducting Kv2.2 S605A point  
340 mutant in organizing ER-PM junctions. TIRF imaging revealed a diffuse localization of GFP-Kv2.2  
341 S605A (Figure 10). The ER-PM junction size (Figure 10; Figure 10-Table 1) and percentage of  
342 PM surface area occupied by cortical ER (Figure 10; Figure 10-Table 2) were not significantly  
343 different between cells coexpressing GFP-Kv2.2 S605A and cells expressing DsRed2-ER5 alone.  
344 This nonclustered GFP-Kv2.2 S605A mutant also had a significantly reduced colocalization with  
345 coexpressed DsRed2-ER5 relative to GFP-Kv2.2 (Figure 10; Figure 10-Table 3). We obtained  
346 similar results for Kv2.1 in that the ability to organize ER-PM junctions was significantly reduced  
347 in the nonclustering but conducting GFP-Kv2.1 S586A point mutant (Figure 10-figure supplement  
348 1, Figure 10-Tables 1-3). Taken together, these results using this set of separation-of-function  
349 point mutants demonstrate that Kv2 channel clustering, but not conduction, is necessary for the  
350 unique ability of PM Kv2 channels to localize to and organize ER-PM junctions, and that the  
351 functions of Kv2 channels in conducting ions and organizing ER-PM junctions are separable and

352 distinct.

353

354 **Kv2.2- and Kv2.1-mediated ER-PM junctions exhibit distinct cell cycle-dependent**  
355 **regulation in COS-1 cells.**

356 Kv2.1 exhibits conditional phosphorylation-dependent clustering that can be regulated by  
357 neuronal activity and other stimuli (52-54, 80-82). In certain mammalian cell lines such as COS-  
358 1 cells, Kv2.1 exhibits reversible cell-cycle dependent clustering and recruitment/stabilization of  
359 ER-PM junctions, presumably due to increased phosphorylation of Kv2.1 observed at the onset  
360 of M-phase (47). To determine whether Kv2.2 exhibited similar cell cycle-dependent regulation,  
361 we expressed mCherry-SEC61 $\beta$  with untagged Kv2.2 or Kv2.1 and performed imaging after  
362 immunolabeling for the expressed Kv2 channel and Hoechst 33258 staining of chromatin to define  
363 cell cycle stage (47). As previously reported, Kv2.1 has an overall diffuse localization in interphase  
364 cells and prominent clustering in M-phase cells (Figure 11; Figure 11-figure supplement 1). In  
365 contrast, Kv2.2 clusters were present in both interphase and M-phase cells (Figure 11; Figure 11-  
366 figure supplement 1), such that in interphase cells Kv2.2 exhibited significantly higher CV values  
367 compared to Kv2.1 (Figure 11; Figure 11-Table 1). In contrast, we found no significant difference  
368 between CV values for Kv2.2 versus Kv2.1 in M-phase cells (Figure 11; Figure 11-Table 1).

369 In interphase COS-1 cells lacking Kv2.2 or Kv2.1 expression, mCherry-SEC61 $\beta$  was  
370 present as reticular tubules and puncta (Figure 11), and expression of Kv2.2 but not Kv2.1  
371 reorganized ER-PM junctions, such that interphase cells expressing Kv2.2 had a ER-PM junctions  
372 significantly larger than cells without Kv2 channel expression or cells expressing Kv2.1 (Figure  
373 11; Figure 11-Table 2). In contrast, mean ER-PM junction cluster size was not significantly  
374 different in cells without or with Kv2.1 expression (Figure 11; Figure 11-Table 2). Taken together,  
375 these data demonstrate that the ability of Kv2.2 to impact ER-PM junctions does not exhibit the  
376 reversible, cell cycle-dependent modulation as seen for Kv2.1, a distinction that could impact Kv2-

377 associated ER-PM junctions in cells primarily expressing one or the other mammalian Kv2  
378 channel paralog.

379

380 **Eliminating Kv2 channel expression *in vivo* impacts RyR-containing ER-PM junctions in**  
381 **brain neurons.**

382 As detailed above, clustered endogenous Kv2 channels colocalize with RyR-containing ER-PM  
383 junctions in brain neurons *in situ* and in culture, and exogenously expressing either Kv2.2 or Kv2.1  
384 can remodel ER-PM junctions in CHNs and heterologous cells. We next tested whether  
385 eliminating Kv2 channel expression in knockout mice impacts the spatial organization of RyR-  
386 containing ER-PM junctions in brain neurons, taking advantage of the availability of Kv2.1 (30,  
387 83) and Kv2.2 (84) knockout mice, and double knockout mice (41). We immunolabeled brain  
388 sections from these mice and from wild-type controls for Kv2.2, Kv2.1 and RyR, and analyzed  
389 RyR clusters in hippocampal CA1 pyramidal neurons, which express both Kv2.2 and Kv2.1 (23,  
390 39, 41, 83). As shown in Figure 12, while there were no significant changes in the spatial  
391 characteristics of RyR clusters in the samples from the single Kv2 knockout mice when compared  
392 to those from wild-type mice, the size of RyR clusters in CA1 pyramidal neurons was significantly  
393 reduced in the samples from the double Kv2 knockout mice (Figure 12-Table 1). This supports an  
394 *in vivo* role for Kv2 channels in organizing RyR-containing ER-PM junctions in brain neurons.

395

## 396 **Discussion**

397 Our results presented here demonstrate that members of the Kv2 channel family have as a  
398 conserved function the ability to organize ER-PM junctions, which is unique among all PM proteins  
399 studied to date. We show that Kv2.2 ion channels localize to ER-PM junctions on somata,  
400 proximal dendrites and the AIS in brain neurons. Experiments in CHNs, and in heterologous  
401 HEK293T and COS-1 cells show that Kv2.2 channels function in themselves to organize ER-PM  
402 junctions. We show that the ability to organize ER-PM junctions is a nonconducting function of



403 mammalian Kv2 ion channels that requires their PM clustering. Moreover, elimination of Kv2  
404 expression in knockout mice leads to altered ER-PM junctions in brain neurons. The conserved  
405 ER-PM junction-organizing function of Kv2.2 and Kv2.1 makes the Kv2 family of mammalian ion  
406 channels the first family of PM proteins whose expression is sufficient to reorganize ER-PM  
407 junctions. Separation-of-function mutants in Kv2.2 and Kv2.1 reveal that this conserved function  
408 is independent of their well-established canonical function as ion conducting channels regulating  
409 electrical signaling in neurons and non-neuronal cells, but entirely dependent on their clustering  
410 in the PM as mediated by a conserved motif in their respective cytoplasmic C-termini whose  
411 mutation does not impact their function as ion channels. Kv2-containing ER-PM junctions are  
412 found at sites deficient in components of the cortical actin cytoskeleton, which contributes to but  
413 is not the sole determinant of the overall spatial organization of Kv2 channel-containing ER-PM  
414 junctions. Kv2-containing ER-PM junctions are found associated with those containing diverse  
415 ER tethers that mediate ER and PM contacts, suggesting that ER-PM junctions formed by Kv2  
416 channels and these ER tethers may structurally and functionally overlap in cells in which they are  
417 coexpressed. While Kv2.2 and Kv2.1 share a conserved function in organizing ER-PM junctions,  
418 they are distinct in that Kv2.2 ER-PM junctions are stable in the face of changes in cellular  
419 environment that result in reversible disruption and subsequent reformation of Kv2.1 ER-PM  
420 junctions. That Kv2.2 and Kv2.1 have distinct patterns of cellular expression suggests that the  
421 highly similar yet distinct functions of these mammalian Kv2 channel paralogs in organizing ER-  
422 PM junctions would distinctly impact the structure, function and regulation of ER-PM junctions in  
423 the types of neurons and non-neuronal cells in which they are differentially expressed.

424 Endogenous Kv2 channels are present in large PM clusters in diverse classes of brain  
425 neurons [Kv2.1: (39, 41, 69); Kv2.2: (18, 39, 41, 42)]. That in certain brain neurons and in neurons  
426 in culture we found clusters of Kv2.2 at sites containing high densities of associated ER-localized  
427 RyRs supports that these clusters represent native Kv2.2-containing ER-PM junctions, and that  
428 these sites are associated with neuronal Ca<sup>2+</sup> signaling. Moreover, that elimination of expression

429 of both Kv2 channels leads to changes in the spatial organization of RyR-containing ER-PM  
430 junctions in brain neurons suggests that Kv2 channels play a role in the structural organization of  
431 these Ca<sup>2+</sup> signaling microdomains. Although both Kv2.2 and Kv2.1 are unique among  
432 mammalian PM proteins in being capable of organizing ER-PM junctions, their distinct cellular  
433 expression patterns in brain and in other mammalian tissues, together with their distinct phospho-  
434 dependent regulation, may contribute to the unique phenotypes seen in mice upon knockout of  
435 either Kv2.2 [altered sleep wake cycles (85)] or Kv2.1 [neuronal and behavioral hyperexcitability  
436 (83)]. The relative contribution of the separate functions of Kv2 channels as ion conducting  
437 channels shaping membrane excitability, and as structural organizers of ER-PM junctions, to the  
438 behavioral phenotypes of these mice is as of yet unknown.

439 Our data using a strategically selected set of separation-of-function point mutants support  
440 that recruitment/stabilization of ER-PM junctions is a nonconducting and physical function of Kv2  
441 channels that relies on their clustering. Both Kv2.2 and Kv2.1 are *bona fide* PM voltage-gated K<sup>+</sup>  
442 channels whose ion conducting function underlies the bulk of the delayed rectifier K<sup>+</sup> current in  
443 various classes of neurons (20-22, 36). Moreover, acute pharmacological inhibition of Kv2  
444 channels impacts neuronal excitability and the characteristics of action potentials (22-25, 86, 87).  
445 Our findings that the ability to organize ER-PM junctions is a nonconducting function of Kv2  
446 channels is intriguing given previous findings that the bulk of exogenous Kv2.1 expressed in either  
447 heterologous cells or neurons may be present in a nonconducting state (88-90). That ion channels  
448 can have diverse nonconducting functions distinct from their canonical ion conducting roles is an  
449 emerging theme in biology, with nonconducting roles as cell adhesion molecules, as enzymes or  
450 as scaffolds for enzymes, as voltage sensors for intracellular events through conformational  
451 coupling, etc. [reviewed in (91)]. Studies in pancreatic beta cells support such a nonconducting  
452 function for Kv2.1 in regulating insulin secretion (92). As this nonconducting role is dependent on  
453 Kv2.1 clustering (93) suggests a potential function for Kv2.1 in organizing ER-PM junctions in  
454 beta cells, which have been proposed to play an important role in glucose-stimulated insulin

455 secretion (94, 95). Recent studies employing whole exome sequencing have led to identification  
456 of encephalopathic epilepsy patients with *de novo* mutations in the KCNB1 gene that encodes  
457 Kv2.1. While the bulk of these disease-associated mutations are in the voltage-sensing and pore  
458 domains that are crucial to the canonical function of Kv2.1 as a *bona fide* Kv channel [e.g., (26-  
459 28)], a subset are nonsense mutations that result in a truncated cytoplasmic C-terminus (29, 96).  
460 While the cytoplasmic C-terminus plays a modulatory role in regulating activation gating of Kv2.1  
461 channels (97-99), the most obvious effect of these nonsense mutations that eliminate the PRC  
462 domain is to disrupt the clustering of Kv2.1 (35, 37, 39, 41, 51, 65) and presumably organization  
463 of ER-PM junctions. Generating mouse models that express the separation-of-function mutations  
464 used here to selectively disrupt Kv2.1 conduction and clustering may lead to insights into these  
465 distinct classes of disease-associated mutations, as well as the relative contributions of the  
466 separable electrical and structural roles of Kv2 channels in normal physiology.

467 Our results show that both members of the Kv2 family of ion channels can in themselves  
468 organize ER-PM junctions. As these are the first mammalian PM proteins with this function  
469 suggests Kv2 channels use a molecular mechanism distinct from all other known classes of ER-  
470 PM junction organizers (*i.e.*, members of the E-Syt, JP and STIM families), which are ER tethers  
471 that bind specific lipids present in the inner leaflet of the PM, although STIM family members also  
472 exhibit conditional interaction with PM Orai proteins (1, 10). That both Kv2.2 and Kv2.1 expression  
473 are sufficient to remodel ER-PM junctions in the absence of their ion conducting functions, and  
474 *via* a mechanism that requires an intact PRC motif, suggests that both Kv2 family members act  
475 through the same mechanism. One plausible mechanism is that the Kv2-specific cytoplasmic C-  
476 termini, and the PRC motif, in particular, interact directly with an ER-localized protein or lipid  
477 binding partner. That these Kv2 channels are capable of forming clusters localized at ER-PM  
478 junctions in diverse cell types including brain neurons of diverse mammalian species *in situ* and  
479 in culture [e.g., (34-36, 39, 41, 42, 48, 52, 80, 81, 90, 100), etc.], spinal motor neurons (101) and  
480 in non-neuronal heterologous cells such as human HEK293 (39, 41), monkey COS-1 (47) and

481 canine MDCK (35) kidney cells, rat PC12 pheochromocytoma cells (102), and hamster CHO  
482 ovary cells (47) suggests that the underlying mechanism involves components highly conserved  
483 across diverse mammalian species and cell types. Moreover, should the mechanism involve  
484 binding to a specific ER protein, the protein should also be highly expressed across these diverse  
485 cell types, as the formation of Kv2 clusters and recruitment of ER-PM junctions is not obviously  
486 saturable, such that the higher the level of Kv2.2 or Kv2.1 expression, the larger the clusters and  
487 associated ER-PM junctions (47, 48). We note that the clustering of Kv2.1 is conditional in many  
488 if not all of these cell backgrounds, such that it occurs in M-phase but not interphase COS-1 cells  
489 (47), polarized MDCK cells in confluent epithelial monolayers but not in nonpolarized MDCK cells  
490 in low density culture (35), and in PC12 cells before but not after differentiation with nerve growth  
491 factor (102). Moreover, in neurons and HEK293 cells, changes in protein kinase (54, 99) and  
492 protein phosphatase (39, 52, 53, 80, 103, 104) activity leads to changes in Kv2.1 phosphorylation  
493 state and clustering, and presumably its association with ER-PM junctions. As such, the  
494 mechanism whereby Kv2.1 organizes ER-PM junctions may involve regulation *via* dynamic  
495 changes in phosphorylation state, including in critical serine residues within the PRC domain itself  
496 (37, 47). That the Kv2.2 PRC domain contains these same serine residues suggests that should  
497 phosphorylation at these sites be required for Kv2.2 clustering and ER-PM junction  
498 reorganization, that this phosphorylation is more constitutive than the dynamically-regulated  
499 phosphorylation of Kv2.1.

500 That Kv2-containing ER-PM junctions can colocalize with all known members of the E-Syt  
501 and STIM families, as well as JP2 and JP4, suggests potential overlap with these distinct classes  
502 of ER-PM junctions in coexpressing mammalian cells. One explanation of these findings is that  
503 these ER-localized PM tethers, by virtue of their ER localization are passively recruited along with  
504 other ER proteins such as Sec61 $\beta$  to Kv2-containing ER-PM junctions. However, the lack of  
505 association of Kv2-containing ER-PM junctions and those generated *via* the rapamycin-triggered  
506 coupling of Lyn11-FRB and CB5-FKBP would argue against a promiscuous presence of Kv2

507 channels at any ER-PM junction. As the tethering of E-Syts, JPs and STIMs to the PM occurs at  
508 least in part on their binding to lipids on the PM inner leaflet (1), another possible explanation for  
509 the robust colocalization between Kv2-containing ER-PM junctions and these ER tethers is that  
510 Kv2 clustering results in a distinct lipid microenvironment in the PM inner leaflet at or near these  
511 clusters. Changes in the local lipid environment at/near Kv2 clusters could also underlie  
512 generation of ER-PM junctions at these sites, *via* recruitment of one or more lipid-binding ER-PM  
513 tethers. As noted above, these tethers in aggregate would need to have sufficiently robust  
514 expression across the numerous species and cell types in which endogenous and exogenous  
515 Kv2 channels are clustered. We note that our quantitative analyses of colocalization between  
516 Kv2-containing ER-PM junctions and these ER tethers suggests that despite the extensive  
517 overlap, as reported by high ( $\approx 1.0$ ) MOC values, the intensity profiles of these proteins do not  
518 uniformly coincide, as reported by significantly lower paired PCC measurements (105). That there  
519 is heterogeneity in ER-PM junctions within the same cell is consistent with the variable co-  
520 occurrence of Kv2.2 and Kv2.1 clusters with RyR clusters between and within different classes of  
521 mammalian brain neurons (38, 48, 106). This concept is further supported by the lack of  
522 colocalization between Kv2-containing ER-PM junctions and those formed *via* triggered coupling  
523 of Lyn11/CB5. That little is known of the subcellular localization of the different members of the  
524 E-Syt, JP and STIM families endogenously expressed in mammalian brain neurons makes it  
525 difficult to understand the relationship between the native ER-PM junctions formed by these ER  
526 tethers and those containing Kv2 channels.

527         That LatA treatment impacted the characteristics of both Kv2-and Lyn11/CB5-containing  
528 ER-PM junctions but did not lead to their fusion suggests that the actin cytoskeleton is not the  
529 only determinant of their distinct spatial organization. The effects of actin disruption on Kv2-  
530 containing ER-PM junctions, and that they are localized to zones at the cell cortex depleted in  
531 actin and actin-interacting proteins, suggests a role for the actin cytoskeleton in shaping their  
532 spatial characteristics. This is consistent with previous studies demonstrating that Kv2.1 clusters

533 on the axon initial segment of brain neurons are specifically localized to ankyrinG-deficient “holes”  
534 (69), and that disruption of the actin cytoskeleton impacts clustering of Kv2.1 (44, 46). Recent  
535 studies reveal that the STIM1:Orai1 complex at the immune synapse (107) and HeLa cell ER-PM  
536 junctions labeled with the reporter MAPPER (108) are also present in actin-poor zones, and that  
537 disruption of the actin cytoskeleton altered the distribution and dynamics of these HeLa cell ER-  
538 PM junctions (108). Depletion of ER Ca<sup>2+</sup> stores triggers a conditional association of the STIM1:  
539 Orai1 complex with Kv2-containing ER-PM junctions (51). We also found that in the absence of  
540 exogenously expressed STIM1, store depletion triggered a significant increase in colocalization  
541 between Kv2.2 and Orai1, presumably due to endogenous STIM1 expression in HEK293T cells  
542 (75). That both ER (RyR) and PM (Orai1) Ca<sup>2+</sup> channels colocalize with Kv2-containing ER-PM  
543 junctions suggests a structural role for Kv2 channels in regulating sites important in neuronal Ca<sup>2+</sup>  
544 homeostasis above and beyond their established role in shaping membrane excitability. Future  
545 studies will define the respective contributions of the separate yet highly conserved conducting  
546 and nonconducting roles of Kv2 channels in impacting cellular physiology, and how this is  
547 disrupted in pathological conditions that may exert their effects through distinct impacts on these  
548 broadly and highly expressed ion channels.

549

## 550 **Materials and methods**

551

### 552 **Preparation of mouse brain sections for immunohistochemistry**

553 All procedures involving mice were approved by the University of California Davis Institutional  
554 Animal Care and Use Committee and were performed in strict accordance with the Guide for the  
555 Care and Use of Laboratory Animals of the NIH. All mice were maintained under standard light-  
556 dark cycles and allowed to feed and drink ad libitum. Kv2.1-KO mice (RRID:IMSR\_MGI:3806050)  
557 have been described previously (30, 83), and were generated from breeding of Kv2.1<sup>+/-</sup> mice that  
558 had been backcrossed on the C57/BL6J background (RRID:IMSR\_JAX:000664). Kv2.2-KO mice

559 (84, 85) were obtained from Drs. Tracey Hermanstyne and Jeanne Nerbonne. All Kv2.2-KO mice  
560 used here were obtained from heterozygotic crosses in the C57/BL6J background  
561 (RRID:IMSR\_JAX:000664). Double knockout mice for Kv2.1/Kv2.2 (Kv2 dKO) were generated by  
562 crossing Kv2.1<sup>+/-</sup> and Kv2.2<sup>-/-</sup> mice. Both male and female mice were used, over 12 weeks old.  
563 Littermates were used when available. Mice were deeply anesthetized with 90 mg/kg Na-  
564 pentobarbital salt (Sigma Cat# P3761) in 0.9% NaCl solution through intraperitoneal injections,  
565 followed by boosts as needed. Once mice were completely anesthetized, they were transcardially  
566 perfused with a brief prefix wash with 4.5 ml of ice cold PBS [150 mM NaCl, 10 mM sodium  
567 phosphate buffer (PB), pH 7.4] containing 10 U/ml heparin, followed by an ice-cold fixative  
568 solution of 4% formaldehyde (freshly prepared from paraformaldehyde, Sigma Cat# 158127) in  
569 0.1 M sodium PB, pH 7.4, using a volume of 1 ml fixative solution per gram of mouse weight.  
570 Following perfusions, brains were removed from the skull and cryoprotected in 10% sucrose, 0.1  
571 M PB overnight at 4°C, then transferred to a solution of 30% sucrose, 0.1 M PB until they sank to  
572 the bottom of the tube (24–48 h). Following cryoprotection, all brains were frozen, and cut on a  
573 freezing stage sliding microtome (Richard Allen Scientific) to obtain 30- $\mu$ m-thick sagittal sections.  
574 Sections were collected in 0.1 M PB and processed for immunohistochemistry (IHC) as free-  
575 floating sections.

576

### 577 **Multiplexed fluorescence immunohistochemistry**

578 Multiplex immunofluorescence labeling of mouse brain sections was performed essentially as  
579 previously described (109). Briefly, free-floating sections were washed 3 $\times$  in 0.1 M PB and 10 mM  
580 sodium azide at room temperature with slow agitation. All subsequent incubations and washes  
581 were at room temperature with slow agitation, unless stated otherwise. Sections were incubated  
582 in blocking buffer (10% goat serum in 0.1 M PB, 0.3% Triton X-100, and 10 mM sodium azide) for  
583 1 h. Immediately after blocking, sections were incubated with primary antibody combinations  
584 (diluted in blocking buffer) overnight at 4°C in shaker. Following incubation, sections were washed

585 3 x 10 min each in 0.1 M PB and incubated for 1 h with affinity-purified goat anti-rabbit and/or goat  
586 anti-mouse IgG-subclass-specific Alexa fluor-conjugated secondary antibodies and diluted in  
587 blocking buffer. Sections were labeled with the DNA-specific dye Hoechst 33258 during the  
588 secondary antibody step. After 3 x 10 min washes in 0.1 M PB, sections were mounted and dried  
589 onto gelatin-coated slides, treated with 0.05% Sudan Black Sudan Black (EM Sciences Cat#  
590 21610) in 70% ethanol for 1.5 min, extensively washed in water, and mounted with Prolong Gold  
591 (ThermoFisher Cat# P36930). All immunolabeling reported for quantification purposes are  
592 representative of three animals (biological replicates) per genotype, except for Kv2.2 KO that  
593 included brain sections from two animals. Brain sections from all biological replicates within each  
594 experiment were labeled, treated, and mounted in parallel.

595 All images were acquired on a Zeiss AxioObserver Z1 microscope with an X-Cite 120 lamp  
596 as the fluorescent light source and equipped with an AxioCam MRm digital camera. High-  
597 magnification optical sections were acquired using an ApoTome structured illumination system  
598 (Carl Zeiss MicroImaging) with a 63X/1.40 NA plan-Apochromat oil immersion objective.  
599 ApoTome z-stacks were acquired and processed with Axiovision 4.8.2 acquisition software (Carl  
600 Zeiss MicroImaging, RRID: SciRes\_000111). All brain sections within a given experiment and  
601 immunolabeled with the same antibody cocktail were imaged under the same conditions  
602 (objective, exposure time, lamp settings, etc.). Image processing was performed in Axiovision  
603 (Carl Zeiss MicroImaging) and Fiji v2.0.0-rc-43/1.51 (NIH). All panels in a given figure were  
604 imaged and processed identically, unless otherwise noted. High-magnification ApoTome z-stacks  
605 were opened for analysis as raw image files in Fiji (NIH) using the Bio-Formats library importing  
606 plugin (Linkert et al., 2010). Quantification was done using single optical z-sections. All statistical  
607 analyses of immunolabeling were performed in Prism (GraphPad).

608 Quantification of RyR immunolabeling was performed in FIJI. Images were first  
609 background subtracted; background levels were determined from “no primary antibody”  
610 immunolabeling controls for each animal, and mathematically subtracted from paired images of



611 RyR labeling, and images were converted to 8-bit. An ROI selection was made to include cell  
612 bodies of neurons in the pyramidal cell layer of CA1, and the image was automatically converted  
613 into a binary mask using auto local thresholding (110). RyR cluster size was quantified  
614 automatically using the “analyze particles” function in FIJI. Particles smaller than 0.06  $\mu\text{m}^2$  were  
615 excluded from this analysis.

616

### 617 **Culture and transfection of rat hippocampal neurons**

618 All procedures involving rats were approved by the University of California Davis Institutional  
619 Animal Care and Use Committee and were performed in strict accordance with the Guide for the  
620 Care and Use of Laboratory Animals of the NIH. All rats were maintained under standard light-  
621 dark cycles and allowed to feed and drink *ad libitum*. Hippocampi were dissected from embryonic  
622 day 18 rat embryos and dissociated enzymatically for 20 min at 37 °C in 0.25% (w/v) trypsin  
623 (ThermoFisher Cat# 15050065) in HBSS and dissociated mechanically by triturating with glass  
624 polished Pasteur pipettes. Dissociated cells were suspended in Neurobasal (Invitrogen Cat#  
625 21103-049) supplemented with 10% FBS (Invitrogen Cat# 16140071), 2% B27 (Invitrogen Cat#  
626 17504044), 1% GlutaMAX (Invitrogen Cat# 35050061), and 0.001% gentamycin (Gibco Cat  
627 #1570-064) and plated at 60,000 cells per dish in glass bottom dishes (MatTek Cat# P35G-1.5-  
628 14-C), or number 1.5 glass coverslips, coated with poly-L-lysine (Sigma Cat# P2636). At 4-7 DIV,  
629 cytosine-D-arabinofuranoside (Millipore Cat# 251010) was added to inhibit non-neuronal cell  
630 growth. CHNs were transiently transfected at DIV 5-10 using Lipofectamine 2000 (Invitrogen Cat#  
631 11668019) for 1.5 hours as previously described (37). CHNs were imaged 40-48 hours post  
632 transfection.

633

### 634 **Heterologous cell culture, reagents, and transfection**

635 HEK293T cells were maintained in Dulbecco's modified Eagle's medium supplemented with 10%  
636 Fetal Clone III (HyClone Cat# SH30109.03), 1% penicillin/streptomycin, and 1X GlutaMAX

637 (ThermoFisher Cat# 35050061) in a humidified incubator at 37 °C and 5% CO<sub>2</sub>. COS-1 cells were  
638 maintained in Dulbecco's modified Eagle's medium supplemented with 10% Bovine Calf Serum  
639 (HyClone Cat# 16777-206), 1% penicillin/streptomycin, and 1X GlutaMAX in a humidified  
640 incubator at 37 °C and 5% CO<sub>2</sub>. HEK293T cells were transfected as previously described (39).  
641 Briefly, HEK293T cells were split to 15% confluence on glass bottom dishes (MatTek Cat# P35G-  
642 1.5-14-C) coated with poly-L lysine then transiently transfected using Lipofectamine 2000  
643 (Invitrogen) transfection reagent following the manufacturer's protocol. HEK293T cells were  
644 transiently transfected in DMEM without supplements, then returned to regular growth media 4  
645 hours after transfection. HEK293T cells were imaged 40-48 hours post-transfection. COS-1 cells  
646 were transiently transfected as previously described (47). Briefly, COS-1 cells were split to 30%  
647 confluence on glass bottom dishes (MatTek Cat# P35G-1.5-14-C) coated with poly-L lysine and  
648 immediately transfected with Kv2.2, Kv2.1, and mCherry-SEC61β in DMEM with supplements.  
649 COS-1 cells were fixed and immunolabeled 40-48 hours post-transfection.

650

### 651 **Cell fixation, immunolabeling, and fixed-cell imaging**

652 For experiments involving imaging of fixed cells, fixation and immunolabeling, fixation was  
653 performed as previously described (111). Briefly, HEK293T and COS-1 cells were fixed in 3.2%  
654 formaldehyde (freshly prepared from paraformaldehyde, Sigma Cat# 158127) and 0.1%  
655 glutaraldehyde (Ted Pella, Inc., Cat # 18426) for 30 minutes and room temperature, washed 3 x  
656 5 minutes in PBS and quenched with 1% sodium borohydride in PBS for 15 minutes at room  
657 temperature. Cells were blocked and permeabilized in 4% non-fat milk powder in PBS containing  
658 0.5 % Triton-X 100. Neurons were fixed in 4% formaldehyde in PBS for 15 minutes, washed 3 x  
659 5 minutes in PBS and blocked and permeabilized in 4% non-fat milk powder in PBS containing  
660 0.1 % Triton-X 100. All antibodies used in this study have been previously described (see Table  
661 1 for a description of primary antibodies). Primary antibody incubation was performed in blocking  
662 solution for 1 hour at room temperature. Following primary antibody incubation, and 3 x 5 minute

663 washes in blocking solution at room temperature, coverslips were immunolabeled with species-  
664 and or mouse IgG subclass-specific Alexa Fluor-conjugated goat anti-mouse IgG subclass-  
665 specific (109) or goat anti-rabbit IgG secondary antibodies (all secondary antibodies from  
666 ThermoFisher) at 1–1500 and Hoechst 33258 (ThermoFisher Cat# H1399) for one hour in  
667 blocking solution, washed 3 x 5 min in PBS, and mounted onto microscope slides using  
668 Fluoromount G (Southern Biotech Cat# 0100-01), or for samples prepared for TIRF, imaged in  
669 PBS containing ascorbate.

670 For conventional fluorescence imaging (used in Figure 1E and 1G; 7A; 10F; and Figure  
671 10-figure supplement 1) images were acquired with an AxioCam MRm digital camera installed on  
672 a Zeiss AxioImager M2 microscope or with an AxioCam HRm digital camera installed on a Zeiss  
673 AxioObserver Z1 microscope with a 63X/1.40 NA plan-Apochromat oil immersion objective or a  
674 20X/0.8 NA plan-Apochromat objective and an ApoTome coupled to Axiovision software (Zeiss,  
675 Oberkochen, Germany). For TIRF imaging of fixed cells, imaging was identical to that used in  
676 live-cell TIRF experiments but in the absence of a heated stage/objective heater. Images were  
677 obtained with an Andor iXon EMCCD camera installed on a TIRF/widefield equipped Nikon  
678 Eclipse Ti microscope using a Nikon LUA4 laser launch with 405, 488, 561, and 647 nm lasers  
679 and a 100X PlanApo TIRF/1.49 NA objective run with NIS Elements software (Nikon). Images  
680 were collected within NIS Elements as ND2 images. For N-SIM imaging of fixed cells, images  
681 were acquired using a Hamamatsu ORCA-ER CCD camera installed on a SIM/widefield equipped  
682 Nikon Eclipse Ti microscope using an EXFO X-Cite metal halide light source and a 100X PlanApo  
683 TIRF/1.49 objective, run with NIS Elements software (Nikon). Images were collected within NIS  
684 Elements as ND2 images. SIM analysis was performed in NIS Elements. Airyscan imaging was  
685 performed with a Zeiss LSM 880 confocal laser scanning microscope (Carl Zeiss), equipped with  
686 an Airyscan detection unit, with a Plan-Apochromat 63X/1.40 Oil DIC M27 objective.

687

688

## 689 **Plasmid constructs**

690 All novel constructs used in this study (GFP-Kv2.2, GFP-Kv2.2 P412W, DsRed-Kv2.2, GFP-Kv2.2  
691 S605A, GFP-Kv2.1 S586A, GFP-Kv2.1 P404W) were generated using standard molecular  
692 biology approaches and confirmed by sequencing. GFP-Kv2.2 and DsRed-Kv2.2 were generated  
693 using Gibson assembly to insert full-length rat Kv2.2, also termed Kv2.2<sub>long</sub> (42) into the GFP-C1  
694 or DsRed-C1 vector (ClonTech) resulting in fusion of GFP or DsRed to the N-terminus of full-  
695 length rat Kv2.2. GFP-Kv2.1 S586A, GFP-Kv2.1 P404W, and GFP-Kv2.2 S605A were generated  
696 *via* site directed point mutagenesis utilizing a quick change PCR reaction of GFP-Kv2.1 (48) or  
697 GFP-Kv2.2, respectively, or *via* Gibson assembly. GFP-Kv2.2 P412W was generated at  
698 Mutagenex. Plasmids encoding DsRed2-ER5 and mCherry-actin were a generous gift from Dr.  
699 Michael Davidson (Addgene plasmids # 55836 and 54965). The plasmid encoding ankG-mCherry  
700 was a generous gift from Dr. Benedicte Dargent (Addgene plasmid #42566). The plasmids  
701 encoding BFP-SEC61 $\beta$ , mCherry-SEC61 $\beta$ , and BFP-STIM1 were a generous gift from Dr. Jodi  
702 Nunnari (University of California, Davis). The plasmid encoding GFP-JP2 was a generous gift  
703 from Dr. Fernando Santana (University of California, Davis). The plasmid encoding mCherry-E-  
704 Syt1-3 was a generous gift from Dr. Pietro De Camilli (Yale University School of Medicine). The  
705 plasmid encoding mCherry-JP4 was a generous gift from Dr. Yousang Gwack (University of  
706 California, Los Angeles). The plasmids encoding mCherry STIM1, 2 $\alpha$ , and 2 $\beta$  and GFP-Orai1  
707 were a generous gift from Dr. Richard Lewis (Stanford University). The plasmids encoding CFP-  
708 CB5-FKBP and Lynn11-FRB (76) were a generous gift from Dr. Eamonn Dickson.

709

## 710 **Live cell Guangxitoxin labeling**

711 The GxTX peptide used in surface labeling was synthesized at the Molecular Foundry of the  
712 Lawrence Berkeley National Laboratory under US Department of Energy contract no. DE-AC02-  
713 05CH11231. HEK293T cells were surface labeled with 1  $\mu$ M GxTX as previously described (64)  
714 and imaged in TIRF as described below but in physiological saline solution (4.7 mM KCl, 146 mM

715 NaCl, 2.5 mM CaCl<sub>2</sub>, 0.6 mM MgSO<sub>4</sub>, 1.6 mM NaHCO<sub>3</sub>. 0.15 mM NaH<sub>2</sub>PO<sub>4</sub>, 20 mM HEPES, pH  
716 7.4) containing 8 mM glucose and 0.1 mM ascorbic acid) containing 0.1% BSA.

717

### 718 **Live cell TIRF imaging**

719 Total internal reflection fluorescence (TIRF) imaging was performed at the UC Davis MCB  
720 Imaging Facility. Live transfected HEK293T cells cultured on glass bottom dishes were imaged in  
721 a physiological saline solution (4.7 mM KCl, 146 mM NaCl, 2.5 mM CaCl<sub>2</sub>, 0.6 mM MgSO<sub>4</sub>, 1.6  
722 mM NaHCO<sub>3</sub>. 0.15 mM NaH<sub>2</sub>PO<sub>4</sub>, 20 mM HEPES, pH 7.4) containing 8 mM glucose and 0.1 mM  
723 ascorbic acid). Cells were maintained at 37°C during the course of imaging with a heated stage  
724 and objective heater. For experiments involving Latrunculin A (ThermoFisher Scientific, Cat#  
725 428021100UG) treatment, Latrunculin A was diluted to 20 µM in imaging saline and added by  
726 pipette, to glass bottom dishes already containing imaging saline, to a final concentration of 10  
727 µM. For experiments involving thapsigargin (Millipore, Cat# 586005-1MG) treatment, thapsigargin  
728 was diluted to 4 µM in imaging saline and added by pipette, to GLASS BOTTOM dishes already  
729 containing imaging saline, to a final concentration of 2 µM. For experiments involving rapamycin  
730 (Sigma, Cat# R8781-200UL) treatment, rapamycin was diluted to 10 µM in imaging saline and  
731 added by pipette to glass bottom dishes already containing imaging saline, to a final concentration  
732 of 5 µM. Images were obtained with an Andor iXon EMCCD camera installed on a TIRF/widefield  
733 equipped Nikon Eclipse Ti microscope using a Nikon LUA4 laser launch with 405, 488, 561, and  
734 647 nm lasers and a 100X PlanApo TIRF, 1.49 NA objective run with NIS Elements software  
735 (Nikon). Images were collected within NIS Elements as ND2 images.

736

### 737 **Cell culture and transfection for electrophysiology**

738 All cell lines were grown in a humidified incubator at 37°C and 5% CO<sub>2</sub>. HEK293T cells were  
739 maintained in Dulbecco's modified Eagle's medium supplemented with 10% fetal bovine serum  
740 (HyClone Cat # SH30109.02) and 1% penicillin/streptomycin. Transfections were performed with

741 Lipofectamine 2000 (Life Technologies Cat #11668-027). Cells were plated overnight prior to  
742 transfection and allowed to grow to  $\approx$ 40% confluency. Lipofectamine was diluted, mixed, and  
743 incubated in Opti-MEM (Gibco Cat #31965-062) in a 1:100 ratio for 5 minutes. Concurrently, 1  $\mu$ g  
744 of plasmid DNA and Opti-MEM were mixed in the same fashion. After incubation, the DNA and  
745 Lipofectamine 2000 mixtures were combined, triturated, and allowed to incubate for 20 minutes.  
746 The transfection cocktail was added to cells for 5 hours before the media was replaced. For  
747 experiments in Figure 9, 1  $\mu$ g of GFP-Kv2 or a pGFP-C1 plasmid were used. For experiments  
748 in Figure 10, 0.2  $\mu$ g of GFP-Kv2 plasmids were diluted with 0.8  $\mu$ g pcDNA3 plasmid.

749

## 750 **Electrophysiology**

751 Whole cell voltage clamp was used to measure currents from HEK293T cells expressing GFP-  
752 Kv2.2, GFP-Kv2.2 P412W, GFP-Kv2.1, GFP-Kv2.1 P404W, or GFP as a control. On the day of  
753 the experiment (two days after transfection), transiently transfected cells were detached with  
754 trypsin and plated onto cell culture-treated polystyrene dishes for electrophysiological  
755 measurements. The external (bath) solution contained (in mM): 3.5 KCl, 155 NaCl, 10 HEPES,  
756 1.5 CaCl<sub>2</sub>, 1 MgCl<sub>2</sub>, adjusted to pH 7.41 with NaOH. The internal (pipet) solution contained (in  
757 mM): 35 KOH, 70 KCl, 50 KF, 50 HEPES, 5 EGTA adjusted to pH 7.2 with KOH. Liquid junction  
758 potential (calculated to be 7.8 mV) was not corrected for. Borosilicate glass pipettes (Sutter  
759 Instruments, Cat #BF150-110-10HP) with resistance less than 3 M $\Omega$  were used to patch the cells.  
760 Recordings were at room temperature (22–24 °C). Voltage clamp was achieved with an Axon  
761 Axopatch 200B amplifier (MDS Analytical Technologies, Sunnyvale, CA) run by PATCHMASTER  
762 software, v2x90.2 (HEKA, Bellmore, NY). Holding potential was -80 mV. Capacitance and Ohmic  
763 leak were subtracted using a P/5 protocol. Recordings were low pass filtered at 10 kHz and  
764 digitized at 100 kHz. Voltage clamp data were analyzed and plotted with IGORPRO software,  
765 version 7 (Wavemetrics, Lake Oswego, OR). Current amplitudes at each voltage were the  
766 average from 0.19-0.20 s after voltage step. In the experiments plotted in Figure 9, series

767 resistance compensation was not used. The estimated series resistance in these experiments  
768 ranged from 3-8 M $\Omega$ , which is predicted to result in substantial cell voltage errors for conducting  
769 channels. For quantitative comparison of current levels and voltage activation (Figure 10), we  
770 improved control of intracellular voltage by reducing the amount of DNA transfected (described  
771 above), partially blocking the K<sup>+</sup> currents with tetraethylammonium (TEA) and using series  
772 resistance compensation. For experiments shown in Figure 10 on HEK293T cells expressing  
773 GFP-Kv2.2, GFP-Kv2.2 S605A, GFP-Kv2.1, or GFP-Kv2.1 S586A, the following modifications  
774 were made. The internal (pipet) solution contained (in mM): 140 KCl, 13.5 NaCl, 1.8 MgCl<sub>2</sub>, 0.09  
775 EGTA, 4 Na-ATP, 0.3 Na-GTP, and 9 HEPES, adjusted to pH 7.2 with KOH. The external (bath)  
776 solution contained (mM): 3.5 KCl, 155 TEA-Cl, 1.5 CaCl<sub>2</sub>, 1 MgCl<sub>2</sub>, 10 HEPES, and 10 glucose  
777 adjusted to pH 7.42 with NaOH. 155 mM extracellular TEA is predicted to inhibit at least 97% of  
778 Kv2.1 current at 0 mV [see (112-114)]. A calculated liquid junction potential of 7.6 mV was  
779 corrected. Pipette tips were coated with Sylgard 184 (Dow Corning Cat #2010518, Midland, MI)  
780 and fire polished. Series resistance compensation with lag set to 10  $\mu$ s was used to constrain  
781 calculated voltage error to  $\leq$  10 mV. Conductance was measured from the amplitude of outward  
782 tail currents averaged from the end of any capacitance transient until 2 ms after stepping to 0 mV  
783 from the indicated voltage. Fits with the fourth power of a Boltzmann distribution are described  
784 previously, where  $V_{mid}$  is the voltage where the function reaches half maximal conductance, and  
785  $z$  is valence in units of elementary charge ( $e^+$ ) of each of the four independent voltage sensors  
786 (115). Conductance data shown are normalized to the maximal conductance of the Boltzmann fit.

787

## 788 **Image analysis and statistics**

789 All colocalization analyses were performed within Nikon NIS Elements using ND2 files. An ROI  
790 was drawn within a cell of interest and PCC and MOC values were collected. Measurements of  
791 structure sizes were quantified automatically within FIJI essentially as previously described (111).  
792 ND2 files of DsRed2-ER5 or BFP-SEC61 $\beta$  collected in TIRF were imported directly into FIJI,

793 background subtracted, converted into an 8-bit image, and automatically converted into a binary  
794 mask using auto local thresholding (110). An ROI with identical dimensions and containing an  
795 area of  $60.6 \mu\text{m}^2$  was drawn within each cell analyzed. The number of individual ER-PM junctions,  
796 average ER-PM junction size, and percent PM occupancy were quantified automatically using the  
797 “analyze particles” function in FIJI. Signals smaller than  $0.04 \mu\text{m}^2$  were excluded from this  
798 analysis. An identical approach was taken in whole cell analysis.

799 Quantification of Kv2 cluster sizes was performed similarly. ND2 files of GFP-Kv2.1, GFP-  
800 Kv2.1 P404W, GFP-Kv2.2, or GFP-Kv2.2 P412W collected in widefield and deconvolved in NIS  
801 elements were imported directly into FIJI, converted into an 8-bit image, and automatically  
802 converted into a binary mask using auto local thresholding (110). Kv2 cluster size was quantified  
803 automatically using the “analyze particles” function in FIJI. For scatterplot generation of ER-PM  
804 junction and Kv2 cluster sizes (Figure 3J), ND2 files were imported directly into FIJI, background  
805 subtracted using a rolling ball radius of 10 pixels and converted into an 8-bit image. Images were  
806 converted into binary masks and manually subjected to erosion operations designed to separate  
807 objects as previously described (111). Care was taken to ensure that the resulting binary image  
808 was comparable to the original image. The areas of these structures were quantified automatically  
809 using the “analyze particles” function in FIJI. Areas from 10-20 overlapping structures from each  
810 cell were paired as coordinates. In cases where more than one structure overlapped, the areas of  
811 the overlapping structures were summed as a single coordinate.

812 Coefficient of variation is defined as standard deviation of intensity divided by mean  
813 intensity as previously described (39, 65). Quantification of coefficient of variation and intensity  
814 measurements were collected in FIJI. An ROI was drawn around a cell and standard deviation of  
815 intensity, and mean intensity values were collected.

816 For line scan analysis of fluorescence intensity, raw intensity values were collected within  
817 FIJI and normalized to the maximum value collected.



818           Analysis of DsRed2-ER5 velocity was performed in MATLAB (MathWorks) using the  
819 PIVlab toolkit (116) as previously described (51). Briefly, successive frames (captured at 31.25  
820 Hz) of DsRed2-ER5 expression in HEK293T cells transfected with DsRed2-ER5 alone or  
821 cotransfected with GFP-Kv2.1, GFP-Kv2.2, GFP-Kv2.1 P404W, or GFP-Kv2.2 P412W, were  
822 collected in TIRF. Images were converted into BMP file format and 1 out of every 10 frames  
823 (creating a time lapse of 320 ms) were imported into PIVlab. Contrast limited adaptive histogram  
824 equalization (contrast enhancement) was engaged, and frame pairs were analyzed with 3  
825 successive passes, utilizing interrogation areas of 64, 32, and 16 pixels. From an ROI drawn  
826 within the center of each cell analyzed, average velocity magnitude values (reported as pixels per  
827 frame) were collected.

828           For all analysis, values were imported into GraphPad Prism for presentation and statistical  
829 analysis as noted. For IHC experiments, we define biological replicates as individual animals. The  
830 datasets in this manuscript involving IHC contain biological replicates. For experiments performed  
831 with cells in culture, we define biological replicates as experiments performed on different days,  
832 and technical replicates as experiments performed on the same day. The datasets in this  
833 manuscript involving cells in culture contain biological and/or technical replicates.

834

## 835 References

- 836 1. Henne WM, Liou J & Emr SD (2015) Molecular mechanisms of inter-organelle ER-PM  
837 contact sites. *Curr Opin Cell Biol* 35:123-130. DOI: 10.1016/j.ceb.2015.05.001.
- 838 2. Gallo A, Vannier C & Galli T (2016) Endoplasmic reticulum-plasma membrane  
839 associations: structures and functions. *Annu Rev Cell Dev Biol* 32:279-301. DOI:  
840 10.1146/annurev-cellbio-111315-125024.
- 841 3. Saheki Y & De Camilli P (2017) Endoplasmic reticulum-plasma membrane contact sites.  
842 *Annu Rev Biochem* 86:659-684. DOI: 10.1146/annurev-biochem-061516-044932.
- 843 4. Chang CL, Chen YJ & Liou J (2017) ER-plasma membrane junctions: Why and how do  
844 we study them? *Biochim Biophys Acta* 1864:1494-1506. DOI:  
845 10.1016/j.bbamcr.2017.05.018.
- 846 5. Dickson EJ (2017) Endoplasmic reticulum-plasma membrane contacts regulate cellular  
847 excitability. *Adv Exp Med Biol* 997:95-109. DOI: 10.1007/978-981-10-4567-7\_7.
- 848 6. Balla T (2017) Ca(2+) and lipid signals hold hands at endoplasmic reticulum-plasma  
849 membrane contact sites. *J Physiol*. DOI: 10.1113/jp274957.
- 850 7. Saheki Y & De Camilli P (2017) The extended-synaptotagmins. *Biochim Biophys Acta*  
851 1864:1490-1493. DOI: 10.1016/j.bbamcr.2017.03.013.
- 852 8. Takeshima H, Hoshijima M & Song LS (2015) Ca(2)(+) microdomains organized by  
853 junctophilins. *Cell Calcium* 58:349-356. DOI: 10.1016/j.ceca.2015.01.007.
- 854 9. Prakriya M & Lewis RS (2015) Store-operated calcium channels. *Physiological reviews*  
855 95:1383-1436. DOI: 10.1152/physrev.00020.2014.
- 856 10. Carrasco S & Meyer T (2011) STIM proteins and the endoplasmic reticulum-plasma  
857 membrane junctions. *Annu Rev Biochem* 80:973-1000. DOI: 10.1146/annurev-biochem-  
858 061609-165311.
- 859 11. Nishi M, Sakagami H, Komazaki S, Kondo H & Takeshima H (2003) Coexpression of  
860 junctophilin type 3 and type 4 in brain. *Brain Res Mol Brain Res* 118:102-110.
- 861 12. Min SW, Chang WP & Sudhof TC (2007) E-Syts, a family of membranous Ca<sup>2+</sup>-sensor  
862 proteins with multiple C2 domains. *Proc Natl Acad Sci U S A* 104:3823-3828. DOI:  
863 10.1073/pnas.0611725104.
- 864 13. Moccia F, Zuccolo E, Soda T, Tanzi F, Guerra G, Mapelli L, Lodola F & D'Angelo E (2015)  
865 Stim and Orai proteins in neuronal Ca(2+) signaling and excitability. *Front Cell Neurosci*  
866 9:153. DOI: 10.3389/fncel.2015.00153.
- 867 14. Rosenbluth J (1962) Subsurface cisterns and their relationship to the neuronal plasma  
868 membrane. *J Cell Biol* 13:405-421.
- 869 15. Henkart M, Landis DM & Reese TS (1976) Similarity of junctions between plasma  
870 membranes and endoplasmic reticulum in muscle and neurons. *J Cell Biol* 70:338-347.
- 871 16. Wu Y, Whiteus C, Xu CS, Hayworth KJ, Weinberg RJ, Hess HF & De Camilli P (2017)  
872 Contacts between the endoplasmic reticulum and other membranes in neurons. *Proc Natl*  
873 *Acad Sci U S A* 114:E4859-E4867. DOI: 10.1073/pnas.1701078114.
- 874 17. Trimmer JS (2015) Subcellular localization of K<sup>+</sup> channels in mammalian brain neurons:  
875 remarkable precision in the midst of extraordinary complexity. *Neuron* 85:238-256. DOI:  
876 10.1016/j.neuron.2014.12.042.
- 877 18. Johnston J, Griffin SJ, Baker C, Skrzypiec A, Chernova T & Forsythe ID (2008) Initial  
878 segment Kv2.2 channels mediate a slow delayed rectifier and maintain high frequency  
879 action potential firing in medial nucleus of the trapezoid body neurons. *J Physiol* 586:3493-  
880 3509. DOI: jphysiol.2008.153734 [pii]10.1113/jphysiol.2008.153734.
- 881 19. Guan D, Tkatch T, Surmeier DJ, Armstrong WE & Foehring RC (2007) Kv2 subunits  
882 underlie slowly inactivating potassium current in rat neocortical pyramidal neurons. *J*  
883 *Physiol* 581:941-960.

- 884 20. Du J, Haak LL, Phillips-Tansey E, Russell JT & McBain CJ (2000) Frequency-dependent  
885 regulation of rat hippocampal somato-dendritic excitability by the K<sup>+</sup> channel subunit  
886 Kv2.1. *J Physiol* 522:19-31. DOI: PHY\_0063 [pii].
- 887 21. Malin SA & Nerbonne JM (2002) Delayed rectifier K<sup>+</sup> currents, IK, are encoded by Kv2  
888 alpha-subunits and regulate tonic firing in mammalian sympathetic neurons. *J Neurosci*  
889 22:10094-10105.
- 890 22. Liu PW & Bean BP (2014) Kv2 channel regulation of action potential repolarization and  
891 firing patterns in superior cervical ganglion neurons and hippocampal CA1 pyramidal  
892 neurons. *J Neurosci* 34:4991-5002. DOI: 10.1523/JNEUROSCI.1925-13.2014.
- 893 23. Palacio S, Chevaleyre V, Brann DH, Murray KD, Piskorowski RA & Trimmer JS (2017)  
894 Heterogeneity in Kv2 channel expression shapes action potential characteristics and firing  
895 patterns in CA1 versus CA2 hippocampal pyramidal neurons. *eNeuro* 4. DOI:  
896 10.1523/ENEURO.0267-17.2017.
- 897 24. Honigsperger C, Nigro MJ & Storm JF (2017) Physiological roles of Kv2 channels in  
898 entorhinal cortex layer II stellate cells revealed by Guangxitoxin-1E. *J Physiol* 595:739-  
899 757. DOI: 10.1113/jp273024.
- 900 25. Pathak D, Guan D & Foehring RC (2016) Roles of specific Kv channel types in  
901 repolarization of the action potential in genetically identified subclasses of pyramidal  
902 neurons in mouse neocortex. *J Neurophysiol* 115:2317-2329. DOI:  
903 10.1152/jn.01028.2015.
- 904 26. Torkamani A, Bersell K, Jorge BS, Bjork RL, Jr., Friedman JR, Bloss CS, Cohen J, Gupta  
905 S, Naidu S, Vanoye CG, George AL, Jr. & Kearney JA (2014) De novo KCNB1 mutations  
906 in epileptic encephalopathy. *Ann Neurol* 76:529-540. DOI: 10.1002/ana.24263.
- 907 27. Saitou H, Akita T, Tohyama J, Goldberg-Stern H, Kobayashi Y, Cohen R, Kato M, Ohba  
908 C, Miyatake S, Tsurusaki Y, Nakashima M, Miyake N, Fukuda A & Matsumoto N (2015)  
909 De novo KCNB1 mutations in infantile epilepsy inhibit repetitive neuronal firing. *Sci Rep*  
910 5:15199. DOI: 10.1038/srep15199.
- 911 28. Thiffault I, Specca DJ, Austin DC, Cobb MM, Eum KS, Safina NP, Grote L, Farrow EG,  
912 Miller N, Soden S, Kingsmore SF, Trimmer JS, Saunders CJ & Sack JT (2015) A novel  
913 epileptic encephalopathy mutation in KCNB1 disrupts Kv2.1 ion selectivity, expression,  
914 and localization. *J Gen Physiol* 146:399-410. DOI: 10.1085/jgp.201511444.
- 915 29. de Kovel CG, Brilstra EH, van Kempen MJ, Van't Slot R, Nijman IJ, Afawi Z, De Jonghe  
916 P, Djemie T, Guerrini R, Hardies K, Helbig I, Hendrickx R, Kanaan M, Kramer U, Lehesjoki  
917 AE, Lemke JR, Marini C, Mei D, Moller RS, Pendziwiat M, Stamberger H, Suls A,  
918 Weckhuysen S, Euro ERES & Koeleman BP (2016) Targeted sequencing of 351  
919 candidate genes for epileptic encephalopathy in a large cohort of patients. *Mol Genet*  
920 *Genomic Med* 4:568-580. DOI: 10.1002/mgg3.235.
- 921 30. Jacobson DA, Kuznetsov A, Lopez JP, Kash S, Ammala CE & Philipson LH (2007) Kv2.1  
922 ablation alters glucose-induced islet electrical activity, enhancing insulin secretion. *Cell*  
923 *Metab* 6:229-235.
- 924 31. Li XN, Herrington J, Petrov A, Ge L, Eiermann G, Xiong Y, Jensen MV, Hohmeier HE,  
925 Newgard CB, Garcia ML, Wagner M, Zhang BB, Thornberry NA, Howard AD, Kaczorowski  
926 GJ & Zhou YP (2013) The role of voltage-gated potassium channels Kv2.1 and Kv2.2 in  
927 the regulation of insulin and somatostatin release from pancreatic islets. *J Pharmacol Exp*  
928 *Ther* 344:407-416. DOI: 10.1124/jpet.112.199083.
- 929 32. Patel AJ, Lazdunski M & Honore E (1997) Kv2.1/Kv9.3, a novel ATP-dependent delayed-  
930 rectifier K<sup>+</sup> channel in oxygen-sensitive pulmonary artery myocytes. *EMBO J* 16:6615-  
931 6625.
- 932 33. Schmalz F, Kinsella J, Koh SD, Vogalis F, Schneider A, Flynn ER, Kenyon JL & Horowitz  
933 B (1998) Molecular identification of a component of delayed rectifier current in  
934 gastrointestinal smooth muscles. *Am J Physiol* 274:G901-911.

- 935 34. Trimmer JS (1991) Immunological identification and characterization of a delayed rectifier  
936 K<sup>+</sup> channel polypeptide in rat brain. *Proc Natl Acad Sci U S A* 88:10764-10768.
- 937 35. Scannevin RH, Murakoshi H, Rhodes KJ & Trimmer JS (1996) Identification of a  
938 cytoplasmic domain important in the polarized expression and clustering of the Kv2.1 K<sup>+</sup>  
939 channel. *J Cell Biol* 135:1619-1632.
- 940 36. Murakoshi H & Trimmer JS (1999) Identification of the Kv2.1 K<sup>+</sup> channel as a major  
941 component of the delayed rectifier K<sup>+</sup> current in rat hippocampal neurons. *J Neurosci*  
942 19:1728-1735.
- 943 37. Lim ST, Antonucci DE, Scannevin RH & Trimmer JS (2000) A novel targeting signal for  
944 proximal clustering of the Kv2.1 K<sup>+</sup> channel in hippocampal neurons. *Neuron* 25:385-397.  
945 DOI: S0896-6273(00)80902-2 [pii].
- 946 38. Mandikian D, Bocksteins E, Parajuli LK, Bishop HI, Cerda O, Shigemoto R & Trimmer JS  
947 (2014) Cell type-specific spatial and functional coupling between mammalian brain Kv2.1  
948 K(+) channels and ryanodine receptors. *J Comp Neurol* 522:3555-3574. DOI:  
949 10.1002/cne.23641.
- 950 39. Bishop HI, Guan D, Bocksteins E, Parajuli LK, Murray KD, Cobb MM, Misonou H, Zito K,  
951 Foehring RC & Trimmer JS (2015) Distinct cell- and layer-specific expression patterns and  
952 independent regulation of Kv2 channel subtypes in cortical pyramidal neurons. *J Neurosci*  
953 35:14922-14942. DOI: 10.1523/JNEUROSCI.1897-15.2015.
- 954 40. Du J, Tao-Cheng JH, Zervas P & McBain CJ (1998) The K<sup>+</sup> channel, Kv2.1, is apposed to  
955 astrocytic processes and is associated with inhibitory postsynaptic membranes in  
956 hippocampal and cortical principal neurons and inhibitory interneurons. *Neuroscience*  
957 84:37-48.
- 958 41. Bishop HI, Cobb MM, Kirmiz M, Parajuli LK, Mandikian D, Philp AM, Melnik M, Kuja-  
959 Panula J, Rauvala H, Shigemoto R, Murray KD & Trimmer JS (2018) Kv2 ion channels  
960 determine the expression and localization of the associated AMIGO-1 cell adhesion  
961 molecule in adult brain neurons. *Front Mol Neurosci* 11:1. DOI: 10.3389/fnmol.2018.00001.
- 962 42. Kihira Y, Hermansteyne TO & Misonou H (2010) Formation of heteromeric Kv2 channels in  
963 mammalian brain neurons. *J Biol Chem* 285:15048-15055. DOI: M109.074260  
964 [pii]10.1074/jbc.M109.074260.
- 965 43. O'Connell KM & Tamkun MM (2005) Targeting of voltage-gated potassium channel  
966 isoforms to distinct cell surface microdomains. *Journal of cell science* 118:2155-2166.
- 967 44. O'Connell KM, Rolig AS, Whitesell JD & Tamkun MM (2006) Kv2.1 potassium channels  
968 are retained within dynamic cell surface microdomains that are defined by a perimeter  
969 fence. *J Neurosci* 26:9609-9618.
- 970 45. Mohapatra DP & Trimmer JS (2006) The Kv2.1 C terminus can autonomously transfer  
971 Kv2.1-like phosphorylation-dependent localization, voltage-dependent gating, and  
972 muscarinic modulation to diverse Kv channels. *J Neurosci* 26:685-695. DOI: 26/2/685  
973 [pii]10.1523/JNEUROSCI.4620-05.2006.
- 974 46. Tamkun MM, O'Connell K M & Rolig AS (2007) A cytoskeletal-based perimeter fence  
975 selectively corrals a sub-population of cell surface Kv2.1 channels. *Journal of cell science*  
976 120:2413-2423.
- 977 47. Cobb MM, Austin DC, Sack JT & Trimmer JS (2015) Cell cycle-dependent changes in  
978 localization and phosphorylation of the plasma membrane Kv2.1 K<sup>+</sup> channel impact  
979 endoplasmic reticulum membrane contact sites in COS-1 cells. *J Biol Chem* 290:29189-  
980 29201. DOI: 10.1074/jbc.M115.690198.
- 981 48. Antonucci DE, Lim ST, Vassanelli S & Trimmer JS (2001) Dynamic localization and  
982 clustering of dendritic Kv2.1 voltage-dependent potassium channels in developing  
983 hippocampal neurons. *Neuroscience* 108:69-81.

- 984 49. Franzini-Armstrong C & Jorgensen AO (1994) Structure and development of E-C coupling  
985 units in skeletal muscle. *Annu Rev Physiol* 56:509-534. DOI:  
986 10.1146/annurev.ph.56.030194.002453.
- 987 50. Sun XH, Protasi F, Takahashi M, Takeshima H, Ferguson DG & Franzini-Armstrong C  
988 (1995) Molecular architecture of membranes involved in excitation-contraction coupling of  
989 cardiac muscle. *J Cell Biol* 129:659-671.
- 990 51. Fox PD, Haberkorn CJ, Akin EJ, Seel PJ, Krapf D & Tamkun MM (2015) Induction of stable  
991 ER-plasma-membrane junctions by Kv2.1 potassium channels. *Journal of cell science*  
992 128:2096-2105. DOI: 10.1242/jcs.166009.
- 993 52. Misonou H, Mohapatra DP, Park EW, Leung V, Zhen D, Misonou K, Anderson AE &  
994 Trimmer JS (2004) Regulation of ion channel localization and phosphorylation by neuronal  
995 activity. *Nat Neurosci* 7:711-718. DOI: 10.1038/nn1260nn1260 [pii].
- 996 53. Misonou H, Mohapatra DP, Menegola M & Trimmer JS (2005) Calcium- and metabolic  
997 state-dependent modulation of the voltage-dependent Kv2.1 channel regulates neuronal  
998 excitability in response to ischemia. *J Neurosci* 25:11184-11193. DOI: 25/48/11184  
999 [pii]10.1523/JNEUROSCI.3370-05.2005.
- 1000 54. Cerda O & Trimmer JS (2011) Activity-dependent phosphorylation of neuronal Kv2.1  
1001 potassium channels by CDK5. *J Biol Chem* 286:28738-28748. DOI:  
1002 10.1074/jbc.M111.251942.
- 1003 55. Dong WH, Chen JC, He YL, Xu JJ & Mei YA (2013) Resveratrol inhibits K(v)2.2 currents  
1004 through the estrogen receptor GPR30-mediated PKC pathway. *Am J Physiol Cell Physiol*  
1005 305:C547-557. DOI: 10.1152/ajpcell.00146.2013.
- 1006 56. Baver SB, Hope K, Guyot S, Bjorbaek C, Kaczorowski C & O'Connell KM (2014) Leptin  
1007 modulates the intrinsic excitability of AgRP/NPY neurons in the arcuate nucleus of the  
1008 hypothalamus. *J Neurosci* 34:5486-5496. DOI: 10.1523/JNEUROSCI.4861-12.2014.
- 1009 57. Hwang PM, Glatt CE, Bredt DS, Yellen G & Snyder SH (1992) A novel K<sup>+</sup> channel with  
1010 unique localizations in mammalian brain: molecular cloning and characterization. *Neuron*  
1011 8:473-481.
- 1012 58. Hwang PM, Fotuhi M, Bredt DS, Cunningham AM & Snyder SH (1993) Contrasting  
1013 immunohistochemical localizations in rat brain of two novel K<sup>+</sup> channels of the Shab  
1014 subfamily. *J Neurosci* 13:1569-1576.
- 1015 59. Hwang PM, Cunningham AM, Peng YW & Snyder SH (1993) CDRK and DRK1 K<sup>+</sup>  
1016 channels have contrasting localizations in sensory systems. *Neuroscience* 55:613-620.
- 1017 60. Zurek N, Sparks L & Voeltz G (2011) Reticulon short hairpin transmembrane domains are  
1018 used to shape ER tubules. *Traffic* 12:28-41. DOI: 10.1111/j.1600-0854.2010.01134.x.
- 1019 61. Day RN & Davidson MW (2009) The fluorescent protein palette: tools for cellular imaging.  
1020 *Chem Soc Rev* 38:2887-2921. DOI: 10.1039/b901966a.
- 1021 62. Besprozvannaya M, Dickson E, Li H, Ginburg KS, Bers DM, Auwerx J & Nunnari J (2018)  
1022 GRAM domain proteins specialize functionally distinct ER-PM contact sites in human cells.  
1023 *eLife* 7. DOI: 10.7554/eLife.31019.
- 1024 63. Herrington J, Zhou YP, Bugianesi RM, Dulski PM, Feng Y, Warren VA, Smith MM, Kohler  
1025 MG, Garsky VM, Sanchez M, Wagner M, Raphaelli K, Banerjee P, Ahaghotu C, Wunderler  
1026 D, Priest BT, Mehl JT, Garcia ML, McManus OB, Kaczorowski GJ & Slaughter RS (2006)  
1027 Blockers of the delayed-rectifier potassium current in pancreatic beta-cells enhance  
1028 glucose-dependent insulin secretion. *Diabetes* 55:1034-1042.
- 1029 64. Tilley DC, Eum KS, Fletcher-Taylor S, Austin DC, Dupre C, Patron LA, Garcia RL, Lam K,  
1030 Yarov-Yarovoy V, Cohen BE & Sack JT (2014) Chemoselective tarantula toxins report  
1031 voltage activation of wild-type ion channels in live cells. *Proc Natl Acad Sci U S A*  
1032 111:E4789-4796. DOI: 10.1073/pnas.1406876111.
- 1033 65. Jensen CS, Watanabe S, Stas JI, Klaphaak J, Yamane A, Schmitt N, Olesen SP, Trimmer  
1034 JS, Rasmussen HB & Misonou H (2017) Trafficking of Kv2.1 channels to the axon initial

- 1035 segment by a novel nonconventional secretory pathway. *J Neurosci* 37:11523-11536.  
1036 DOI: 10.1523/JNEUROSCI.3510-16.2017.
- 1037 66. Sanchez-Ponce D, DeFelipe J, Garrido JJ & Munoz A (2012) Developmental expression  
1038 of Kv potassium channels at the axon initial segment of cultured hippocampal neurons.  
1039 *PLoS One* 7:e48557. DOI: 10.1371/journal.pone.0048557.
- 1040 67. Letierrier C (2016) The Axon Initial Segment, 50 years later: A nexus for neuronal  
1041 organization and function. *Curr Top Membr* 77:185-233. DOI:  
1042 10.1016/bs.ctm.2015.10.005.
- 1043 68. Sanchez-Ponce D, DeFelipe J, Garrido JJ & Munoz A (2011) In vitro maturation of the  
1044 cisternal organelle in the hippocampal neuron's axon initial segment. *Mol Cell Neurosci*  
1045 48:104-116. DOI: 10.1016/j.mcn.2011.06.010.
- 1046 69. King AN, Manning CF & Trimmer JS (2014) A unique ion channel clustering domain on  
1047 the axon initial segment of mammalian neurons. *J Comp Neurol* 522:2594-2608. DOI:  
1048 10.1002/cne.23551.
- 1049 70. Schluter A, Del Turco D, Deller T, Gutzmann A, Schultz C & Engelhardt M (2017)  
1050 Structural plasticity of synaptopodin in the axon initial segment during visual cortex  
1051 development. *Cereb Cortex* 27:4662-4675. DOI: 10.1093/cercor/bhx208.
- 1052 71. Spector I, Shochet NR, Kashman Y & Groweiss A (1983) Latrunculins: novel marine toxins  
1053 that disrupt microfilament organization in cultured cells. *Science* 219:493-495.
- 1054 72. Williams RT, Manji SS, Parker NJ, Hancock MS, Van Stekelenburg L, Eid JP, Senior PV,  
1055 Kazenwadel JS, Shandala T, Saint R, Smith PJ & Dziadek MA (2001) Identification and  
1056 characterization of the STIM (stromal interaction molecule) gene family: coding for a novel  
1057 class of transmembrane proteins. *Biochem J* 357:673-685.
- 1058 73. Soboloff J, Spassova MA, Hewavitharana T, He LP, Xu W, Johnstone LS, Dziadek MA &  
1059 Gill DL (2006) STIM2 is an inhibitor of STIM1-mediated store-operated Ca<sup>2+</sup> Entry. *Curr*  
1060 *Biol* 16:1465-1470. DOI: 10.1016/j.cub.2006.05.051.
- 1061 74. Brandman O, Liou J, Park WS & Meyer T (2007) STIM2 is a feedback regulator that  
1062 stabilizes basal cytosolic and endoplasmic reticulum Ca<sup>2+</sup> levels. *Cell* 131:1327-1339.  
1063 DOI: 10.1016/j.cell.2007.11.039.
- 1064 75. Shalygin A, Skopin A, Kalinina V, Zimina O, Glushankova L, Mozhayeva GN &  
1065 Kaznacheyeva E (2015) STIM1 and STIM2 proteins differently regulate endogenous  
1066 store-operated channels in HEK293 cells. *J Biol Chem* 290:4717-4727. DOI:  
1067 10.1074/jbc.M114.601856.
- 1068 76. Inoue T, Heo WD, Grimley JS, Wandless TJ & Meyer T (2005) An inducible translocation  
1069 strategy to rapidly activate and inhibit small GTPase signaling pathways. *Nat Methods*  
1070 2:415-418. DOI: 10.1038/nmeth763.
- 1071 77. Lee HC, Wang JM & Swartz KJ (2003) Interaction between extracellular Hanatoxin and  
1072 the resting conformation of the voltage-sensor paddle in Kv channels. *Neuron* 40:527-536.  
1073 DOI: S0896627303006366 [pii].
- 1074 78. Wu MM, Covington ED & Lewis RS (2014) Single-molecule analysis of diffusion and  
1075 trapping of STIM1 and Orai1 at endoplasmic reticulum-plasma membrane junctions.  
1076 *Molecular biology of the cell* 25:3672-3685. DOI: 10.1091/mbc.E14-06-1107.
- 1077 79. VanDongen AM, Frech GC, Drewe JA, Joho RH & Brown AM (1990) Alteration and  
1078 restoration of K<sup>+</sup> channel function by deletions at the N- and C-termini. *Neuron* 5:433-443.
- 1079 80. Misonou H, Menegola M, Mohapatra DP, Guy LK, Park KS & Trimmer JS (2006)  
1080 Bidirectional activity-dependent regulation of neuronal ion channel phosphorylation. *J*  
1081 *Neurosci* 26:13505-13514. DOI: 26/52/13505 [pii]10.1523/JNEUROSCI.3970-06.2006.
- 1082 81. Misonou H, Thompson SM & Cai X (2008) Dynamic regulation of the Kv2.1 voltage-gated  
1083 potassium channel during brain ischemia through neuroglial interaction. *J Neurosci*  
1084 28:8529-8538. DOI: 28/34/8529 [pii]10.1523/JNEUROSCI.1417-08.2008.

- 1085 82. Romer SH, Deardorff AS & Fyffe RE (2016) Activity-dependent redistribution of Kv2.1 ion  
1086 channels on rat spinal motoneurons. *Physiol Rep* 4. DOI: 10.14814/phy2.13039.
- 1087 83. Specia DJ, Ogata G, Mandikian D, Bishop HI, Wiler SW, Eum K, Wenzel HJ, Doisy ET,  
1088 Matt L, Campi KL, Golub MS, Nerbonne JM, Hell JW, Trainor BC, Sack JT, Schwartzkroin  
1089 PA & Trimmer JS (2014) Deletion of the Kv2.1 delayed rectifier potassium channel leads  
1090 to neuronal and behavioral hyperexcitability. *Genes Brain Behav* 13:394-408. DOI:  
1091 10.1111/gbb.12120.
- 1092 84. Hermanstynne TO, Subedi K, Le WW, Hoffman GE, Meredith AL, Mong JA & Misonou H  
1093 (2013) Kv2.2: a novel molecular target to study the role of basal forebrain GABAergic  
1094 neurons in the sleep-wake cycle. *Sleep* 36:1839-1848. DOI: 10.5665/sleep.3212.
- 1095 85. Hermanstynne TO, Kihira Y, Misono K, Deitchler A, Yanagawa Y & Misonou H (2010)  
1096 Immunolocalization of the voltage-gated potassium channel Kv2.2 in GABAergic neurons  
1097 in the basal forebrain of rats and mice. *J Comp Neurol* 518:4298-4310. DOI:  
1098 10.1002/cne.22457.
- 1099 86. Guan D, Armstrong WE & Foehring RC (2013) Kv2 channels regulate firing rate in  
1100 pyramidal neurons from rat sensorimotor cortex. *J Physiol* 591:4807-4825. DOI:  
1101 10.1113/jphysiol.2013.257253.
- 1102 87. Kimm T, Khaliq ZM & Bean BP (2015) Differential regulation of action potential shape and  
1103 burst-frequency firing by BK and Kv2 channels in substantia nigra dopaminergic neurons.  
1104 *J Neurosci* 35:16404-16417. DOI: 10.1523/JNEUROSCI.5291-14.2015.
- 1105 88. Benndorf K, Koopmann R, Lorra C & Pongs O (1994) Gating and conductance properties  
1106 of a human delayed rectifier K<sup>+</sup> channel expressed in frog oocytes. *J Physiol* 477 ( Pt 1):1-  
1107 14.
- 1108 89. O'Connell KM, Loftus R & Tamkun MM (2010) Localization-dependent activity of the Kv2.1  
1109 delayed-rectifier K<sup>+</sup> channel. *Proc Natl Acad Sci U S A* 107:12351-12356. DOI:  
1110 1003028107 [pii]10.1073/pnas.1003028107.
- 1111 90. Fox PD, Loftus RJ & Tamkun MM (2013) Regulation of Kv2.1 K(+) conductance by cell  
1112 surface channel density. *J Neurosci* 33:1259-1270. DOI: 10.1523/JNEUROSCI.3008-  
1113 12.2013.
- 1114 91. Kaczmarek LK (2006) Non-conducting functions of voltage-gated ion channels. *Nat Rev*  
1115 *Neurosci* 7:761-771. DOI: 10.1038/nrn1988.
- 1116 92. Dai XQ, Manning Fox JE, Chikvashvili D, Casimir M, Plummer G, Hajmrle C, Spigelman  
1117 AF, Kin T, Singer-Lahat D, Kang Y, Shapiro AM, Gaisano HY, Lotan I & Macdonald PE  
1118 (2012) The voltage-dependent potassium channel subunit Kv2.1 regulates insulin  
1119 secretion from rodent and human islets independently of its electrical function.  
1120 *Diabetologia* 55:1709-1720. DOI: 10.1007/s00125-012-2512-6.
- 1121 93. Fu J, Dai X, Plummer G, Suzuki K, Bautista A, Githaka JM, Senior L, Jensen M, Greitzer-  
1122 Antes D, Manning Fox JE, Gaisano HY, Newgard CB, Touret N & MacDonald PE (2017)  
1123 Kv2.1 clustering contributes to insulin exocytosis and rescues human beta-cell dysfunction.  
1124 *Diabetes* 66:1890-1900. DOI: 10.2337/db16-1170.
- 1125 94. Li L, Pan ZF, Huang X, Wu BW, Li T, Kang MX, Ge RS, Hu XY, Zhang YH, Ge LJ, Zhu  
1126 DY, Wu YL & Lou YJ (2016) Junctophilin 3 expresses in pancreatic beta cells and is  
1127 required for glucose-stimulated insulin secretion. *Cell Death Dis* 7:e2275. DOI:  
1128 10.1038/cddis.2016.179.
- 1129 95. Lees JA, Messa M, Sun EW, Wheeler H, Torta F, Wenk MR, De Camilli P & Reinisch KM  
1130 (2017) Lipid transport by TMEM24 at ER-plasma membrane contacts regulates pulsatile  
1131 insulin secretion. *Science* 355. DOI: 10.1126/science.aah6171.
- 1132 96. Marini C, Romoli M, Parrini E, Costa C, Mei D, Mari F, Parmeggiani L, Procopio E, Metitieri  
1133 T, Cellini E, Virdò S, De Vita D, Gentile M, Prontera P, Calabresi P & Guerrini R (2017)  
1134 Clinical features and outcome of 6 new patients carrying de novo KCNB1 gene mutations.  
1135 *Neurology Genetics* 3. DOI: 10.1212/nxg.0000000000000206.

- 1136 97. Murakoshi H, Shi G, Scannevin RH & Trimmer JS (1997) Phosphorylation of the Kv2.1 K<sup>+</sup>  
1137 channel alters voltage-dependent activation. *Mol Pharmacol* 52:821-828.
- 1138 98. Park KS, Mohapatra DP, Misonou H & Trimmer JS (2006) Graded regulation of the Kv2.1  
1139 potassium channel by variable phosphorylation. *Science* 313:976-979. DOI: 313/5789/976  
1140 [pii]10.1126/science.1124254.
- 1141 99. Ikematsu N, Dallas ML, Ross FA, Lewis RW, Rafferty JN, David JA, Suman R, Peers C,  
1142 Hardie DG & Evans AM (2011) Phosphorylation of the voltage-gated potassium channel  
1143 Kv2.1 by AMP-activated protein kinase regulates membrane excitability. *Proc Natl Acad*  
1144 *Sci U S A* 108:18132-18137. DOI: 10.1073/pnas.1106201108.
- 1145 100. Frazzini V, Guarnieri S, Bomba M, Navarra R, Morabito C, Mariggio MA & Sensi SL (2016)  
1146 Altered Kv2.1 functioning promotes increased excitability in hippocampal neurons of an  
1147 Alzheimer's disease mouse model. *Cell Death Dis* 7:e2100. DOI: 10.1038/cddis.2016.18.
- 1148 101. Muennich EA & Fyffe RE (2004) Focal aggregation of voltage-gated, Kv2.1 subunit-  
1149 containing, potassium channels at synaptic sites in rat spinal motoneurons. *J Physiol*  
1150 554:673-685. DOI: 10.1113/jphysiol.2003.056192.
- 1151 102. Sharma N, D'Arcangelo G, Kleinlaus A, Haleboua S & Trimmer JS (1993) Nerve growth  
1152 factor regulates the abundance and distribution of K<sup>+</sup> channels in PC12 cells. *J Cell Biol*  
1153 123:1835-1843.
- 1154 103. Schulien AJ, Justice JA, Di Maio R, Wills ZP, Shah NH & Aizenman E (2016) Zn(2<sup>+</sup>) -  
1155 induced Ca(2<sup>+</sup>) release via ryanodine receptors triggers calcineurin-dependent  
1156 redistribution of cortical neuronal Kv2.1 K(+) channels. *J Physiol* 594:2647-2659. DOI:  
1157 10.1113/JP272117.
- 1158 104. Shah NH, Schulien AJ, Clemens K, Aizenman TD, Hageman TM, Wills ZP & Aizenman E  
1159 (2014) Cyclin e1 regulates Kv2.1 channel phosphorylation and localization in neuronal  
1160 ischemia. *J Neurosci* 34:4326-4331. DOI: 10.1523/JNEUROSCI.5184-13.2014.
- 1161 105. Dunn KW, Kamocka MM & McDonald JH (2011) A practical guide to evaluating  
1162 colocalization in biological microscopy. *Am J Physiol Cell Physiol* 300:C723-742. DOI:  
1163 10.1152/ajpcell.00462.2010.
- 1164 106. Misonou H, Mohapatra DP & Trimmer JS (2005) Kv2.1: a voltage-gated K<sup>+</sup> channel critical  
1165 to dynamic control of neuronal excitability. *Neurotoxicology* 26:743-752. DOI: S0161-  
1166 813X(05)00048-3 [pii]10.1016/j.neuro.2005.02.003.
- 1167 107. Hartzell CA, Jankowska KI, Burkhardt JK & Lewis RS (2016) Calcium influx through CRAC  
1168 channels controls actin organization and dynamics at the immune synapse. *eLife* 5. DOI:  
1169 10.7554/eLife.14850.
- 1170 108. Hsieh TS, Chen YJ, Chang CL, Lee WR & Liou J (2017) Cortical actin contributes to spatial  
1171 organization of ER-PM junctions. *Molecular biology of the cell* 28:3171-3180. DOI:  
1172 10.1091/mbc.E17-06-0377.
- 1173 109. Manning CF, Bundros AM & Trimmer JS (2012) Benefits and pitfalls of secondary  
1174 antibodies: why choosing the right secondary is of primary importance. *PLoS One*  
1175 7:e38313. DOI: 10.1371/journal.pone.0038313.
- 1176 110. Bernsen J (1986) Dynamic thresholding of gray-level images. *Proc. 8th Int. Conf. on*  
1177 *Pattern Recognition*, pp 1251-1255.
- 1178 111. Dickson EJ, Jensen JB, Vivas O, Kruse M, Traynor-Kaplan AE & Hille B (2016) Dynamic  
1179 formation of ER-PM junctions presents a lipid phosphatase to regulate phosphoinositides.  
1180 *J Cell Biol* 213:33-48. DOI: 10.1083/jcb.201508106.
- 1181 112. Ikeda SR & Korn SJ (1995) Influence of permeating ions on potassium channel block by  
1182 external tetraethylammonium. *J Physiol* 486 ( Pt 2):267-272.
- 1183 113. Immke D, Wood M, Kiss L & Korn SJ (1999) Potassium-dependent changes in the  
1184 conformation of the Kv2.1 potassium channel pore. *J Gen Physiol* 113:819-836.



- 1185 114. Immke D & Korn SJ (2000) Ion-Ion interactions at the selectivity filter. Evidence from K(+)-  
1186 dependent modulation of tetraethylammonium efficacy in Kv2.1 potassium channels. J  
1187 Gen Physiol 115:509-518.
- 1188 115. Sack JT, Aldrich RW & Gilly WF (2004) A gastropod toxin selectively slows early  
1189 transitions in the Shaker K channel's activation pathway. J Gen Physiol 123:685-696. DOI:  
1190 10.1085/jgp.200409047.
- 1191 116. Thielicke W & Stamhuis EJ (2014) Towards user-friendly, affordable and accurate digital  
1192 particle image velocimetry in MATLAB. J Open Res Software 2:e30. DOI:  
1193 doi.org/10.5334/jors.bl.  
1194
- 1195

1196 **Table 1. Antibody information.**

1197

| Antigen and antibody name       | Immunogen                                                     | Manufacturer information                                             | Concentration used                                                        | Figures used      |
|---------------------------------|---------------------------------------------------------------|----------------------------------------------------------------------|---------------------------------------------------------------------------|-------------------|
| <b>Kv2.2 (N372B/60)</b>         | Fusion protein aa 717-907 of rat Kv2.2 long isoform           | Mouse IgG2a mAb, NeuroMab catalog #73-360, RRID:AB_2315867           | Purified, 10 µg/mL (1-cortex, 11, 11-S1), 20 µg/mL (1-CA1), 15 µg/mL (12) | 1, 11, 11-S1, 12, |
| <b>Kv2.2 (N372C/51)</b>         | Fusion protein aa 717-907 of rat Kv2.2 long isoform           | Mouse IgG1 mAb, NeuroMab catalog #75-358, RRID:AB_2315866            | Purified, 10 µg/mL                                                        | 7 (IHC)           |
| <b>Kv2.1 (K89/34)</b>           | Synthetic peptide aa 837-853 of rat Kv2.1                     | Mouse IgG1 mAb, NeuroMab catalog #73-014, RRID:AB_1067225            | Tissue culture supernatant, 1:5                                           | 1, 11, 11-S1      |
| <b>Kv2.1 (KC)</b>               | Synthetic peptide aa 837-853 or rat Kv2.1                     | Rabbit pAb, In-house (Trimmer Laboratory), RRID:AB_2315767           | Affinity-purified, 1:150                                                  | 1, 12             |
| <b>Ryanodine Receptor (34C)</b> | Partially purified chicken pectoral muscle ryanodine receptor | Mouse IgG1 mAb, Developmental Studies Hybridoma Bank, RRID:AB_528457 | Concentrated tissue culture supernatant, 1 µg/mL                          | 1 (CHNs)          |
| <b>Ryanodine Receptor (34C)</b> | Partially purified chicken pectoral muscle ryanodine receptor | Mouse IgG1 mAb, ThermoFisher catalog #MA3-925, RRID:AB_2254138       | Purified, 2.5 µg/mL (1-cortex), 1 µg/mL (1-CA1, 12)                       | 1, 12 (Brain IHC) |
| <b>AnkyrinG (N106/36)</b>       | Full-length recombinant human                                 | Mouse IgG2b mAb, NeuroMab catalog #75-147, RRID:AB_10675130          | Purified, 10 µg/mL                                                        | 7 (CHNs)          |
| <b>AnkyrinG (N106/65)</b>       | Full-length recombinant human                                 | Mouse IgG2b mAb, NeuroMab catalog #75-147, RRID:AB_10675130          | Purified, 5 µg/mL                                                         | 7 (IHC)           |
| <b>MAP2</b>                     | Purified microtubule associated protein from rat brain        | Chicken pAb, EnCor catalog #CPCA-MAP2, RRID:AB_2138173               | Purified IgY fraction, 1:5000                                             | 1                 |

1198

1199

1200 **Figure legends.**

1201

1202 **Figure 1. Endogenous Kv2.2 associates with RyR-containing ER-PM junctions in brain**  
1203 **neurons *in situ* and in culture.**

1204 Projected z-stack images of multiplex immunofluorescence labeling of adult mouse neocortex and  
1205 hippocampal CA1 region, and CHNs, for Kv2.2 and RyR, or Kv2.2, RyR and Kv2.1, as indicated.  
1206 Scale bar in Kv2.2 neocortex panel is 10  $\mu\text{m}$  and holds for all brain panels. Scale bar in MAP2  
1207 CHN panel is 10  $\mu\text{m}$  and holds for all CHN panels in that row. Image exposure time was optimized  
1208 for the labeling of each brain region independently. Scale bar in Kv2.2 magnified inset is 2.5  $\mu\text{m}$   
1209 and holds for all panels in that row. Panels to the right of each set of images are the corresponding  
1210 normalized fluorescence intensity values across the individual line scans depicted by the white  
1211 line in the merged images.

1212

1213 **Figure 2. Exogenous Kv2.2 associates with ER-PM junctions in HEK293T cells.**

1214 Images of fixed HEK293T cells coexpressing GFP-Kv2.2 and BFP-SEC61 $\beta$ . The top two rows  
1215 show a single optical section taken through the center of the cell. The scale bar in the low  
1216 magnification panel is 2.5  $\mu\text{m}$ , and for the enlarged panel is 1.25  $\mu\text{m}$ . The bottom rows show a  
1217 2D projection of a 3D reconstruction (top row), and a single orthogonal slice through the 3D  
1218 reconstruction (bottom row). Scale bar in the GFP-Kv2.2 panel of the 3D reconstruction is 2.5  $\mu\text{m}$ ,  
1219 and holds for all panels in bottom two rows. Panels to the right of each set of rows are the  
1220 corresponding normalized fluorescence intensity values across the individual line scans depicted  
1221 by the arrows (top) or white line (bottom) in the merged images.

1222

1223 **Figure 3. Exogenous Kv2 expression remodels ER-PM junctions in HEK293T cells.**

1224 TIRF images of live HEK293T cells expressing DsRed2-ER5 either alone, or in conjunction with  
1225 GFP-Kv2.2, GFP-Kv2.1, or GFP-Kv1.4, as indicated. Scale bar is 5  $\mu\text{m}$  and holds for all panels.

1226 Graphs on bottom show population data. Left: Graph of mean ER-PM junction (EPJ) size per cell  
1227 measured from HEK293T cells coexpressing DsRed2-ER5 and GFP-Kv2.2, GFP-Kv2.1, GFP-  
1228 Kv1.4, or DsRed2-ER5 alone (control). Middle: Graph of percent of the PM area per cell occupied  
1229 by cortical ER measured from HEK293T cells coexpressing DsRed2-ER5 and GFP-Kv2.2, GFP-  
1230 Kv2.1, GFP-Kv1.4, or DsRed2-ER5 alone (control). Right: graph of Pearson's Correlation  
1231 Coefficient (PCC) values between DsRed2-ER5 and GFP-Kv2.2, GFP-Kv2.1, or GFP-Kv1.4  
1232 measured from HEK293T cells coexpressing DsRed2-ER5 and GFP-Kv constructs. The dashed  
1233 line denotes a PCC value of 0.5. Bars on all graphs are mean  $\pm$  SD. See Figure 3-Tables 1-3 for  
1234 values and statistical analyses.

1235

1236 **Figure 4. Exogenous Kv2.2 expression remodels ER-PM junctions in cultured neurons.**

1237 TIRF image of a live CHN (DIV7) expressing DsRed2-ER5 alone (left panel and inset shown  
1238 below) or coexpressing DsRed2-ER5 and GFP-Kv2.2 (right panels and insets shown below).  
1239 Scale bar in DsRed2-ER5 panel is 10  $\mu$ m and holds for all panels in that row. Scale bar in DsRed2-  
1240 ER5 magnified inset panel is 2.5  $\mu$ m and holds for all panels in that row. Scatter plot shows sizes  
1241 of Kv2.2 clusters and associated ER-PM junctions (EPJs, as reported by DsRed2-ER5 in TIRF)  
1242 in CHNs (black points) and in HEK293T cells (red points). n = 3 cells each.

1243

1244 **Figure 5. ER-PM junction-localized Kv2.2 channels are expressed on the cell surface.**

1245 TIRF images of a live HEK293T cell expressing GFP-Kv2.2 and DsRed2-ER5, and surface  
1246 labeled for Kv2 channels with GxTX-633. Heat map shows overlap of GFP-Kv2.2 and GxTX-633  
1247 pixels. Scale bar is 5  $\mu$ m. Bottom left panel shows the fluorescence intensity values across the  
1248 individual line scan depicted by the white line in the merged image. Graph on bottom right shows  
1249 the PCC values between pairs of indicated signals as measured from live HEK293T cells surface  
1250 labeled with GxTX-633 and coexpressing GFP-tagged Kv2.2 channels and DsRed2-ER5. Bars  
1251 are mean  $\pm$  SD. See Figure 5-Table 1 for values and statistical analyses.

1252

1253 **Figure 5-figure supplement 1. ER-PM junction-localized Kv2.1 channels are expressed on**  
1254 **the cell surface.**

1255 Top panels. TIRF images of live HEK293T cells coexpressing SEP-Kv2.1 and BFP-SEC61 $\beta$  and  
1256 surface labeled with GxTX-633. The merged image shows SEP-Kv2.1 (pHluorin), BFP-SEC61 $\beta$ ,  
1257 and GxTX-633. Scale bar is 5  $\mu$ m and holds for all panels. Heat map shows overlap of SEP-Kv2.1  
1258 (pHluorin) and GxTX-633 pixels. Bottom left panel shows the normalized fluorescence intensity  
1259 values across the line scan depicted by the white line in the merged image. Graph on bottom right  
1260 shows PCC values between GxTX and SEP-Kv2.1 or BFP-SEC61 $\beta$ . Bars are mean  $\pm$  SD. See  
1261 Figure 5-Table 1 for values and statistical analyses.

1262

1263 **Figure 6. Kv2-mediated ER-PM junctions are located at sites depleted in components of**  
1264 **the cortical actin cytoskeleton.**

1265 Top left panels. Brain sections immunolabeled for Kv2.2, Kv2.1, and ankG. Scale bar for large  
1266 image is 20  $\mu$ m, and for Kv2.2 inset is 3  $\mu$ m and holds for all inset panels. Middle panels. Projected  
1267 z-stack of optical sections taken from a CHN immunolabeled for Kv2.2, Kv2.1, and ankG. Scale  
1268 bar for large image is 20  $\mu$ m, and for Kv2.2 inset is 3  $\mu$ m and holds for all inset panels. Right  
1269 panels. Single optical section taken from a CHN immunolabeled for Kv2.2, Kv2.1, and labeled for  
1270 F-actin with phalloidin. Scale bar for merged panel is 10  $\mu$ m holds for all panels in set. Panels  
1271 below each set of images show the corresponding normalized fluorescence intensity values  
1272 across the line scans indicated in the merged images in that column. Lower panels. TIRF images  
1273 of live HEK293T cells coexpressing GFP-Kv2.2 and BFP-SEC61 $\beta$  in conjunction with mCherry-  
1274 actin (top row) or ankG-mCherry (bottom row). Scale bar for GFP-Kv2.2 panel in top row is 5  $\mu$ m  
1275 and holds for all panels in set. Panels to the right of these rows show the corresponding  
1276 normalized fluorescence intensity values across the line scan depicted by the white line in the  
1277 merged images. Graph shows PCC values from cells coexpressing either GFP-Kv2.2 or GFP-

1278 Kv2.1 and mCherry-actin or ankG-mCherry. Bars on all graphs are mean  $\pm$  SD. See Figure 6-  
1279 Table 1 for values and statistical analyses.

1280

1281 **Figure 6-Figure supplement 1. Kv2.1-mediated ER-PM junctions are located at sites**  
1282 **depleted in components of the cortical actin cytoskeleton.**

1283 Top panels. TIRF image of a live HEK293T cell expressing GFP-Kv2.1, BFP-SEC61 $\beta$ , and  
1284 mCherry-actin. Bottom panels. TIRF image of a live HEK293T cell expressing GFP-Kv2.1, BFP-  
1285 SEC61 $\beta$ , and ankG-mCherry. Scale bar for GFP-Kv2.1 panel in top row is 5  $\mu$ m and holds for all  
1286 panels in set. Panels to the right of each row are the corresponding normalized fluorescence  
1287 intensity values across the individual line scans depicted by the white line in the merged images.

1288

1289 **Figure 7. Disrupting the actin cytoskeleton impacts spatial organization of Kv2.2-mediated**  
1290 **ER-PM junctions.**

1291 TIRF images of a live HEK293T cell coexpressing GFP-Kv2.2 and DsRed2-ER5, prior to, and 15  
1292 min after, Latrunculin A (LatA) treatment. Scale bar in GFP-Kv2.2 Rest panel is 5  $\mu$ m and holds  
1293 for all panels. Graphs below show values measured from cells before and after a 15-minute  
1294 treatment with 10  $\mu$ M LatA. Top left graph. Mean ER-PM junction (EPJ) size per cell. Top right  
1295 graph: Mean Kv2.2 cluster size per cell. Bottom left graph. Number of ER-PM junctions per cell.  
1296 Bottom right graph. PCC values between Kv2.2 and DsRed2-ER5. Bars on all graphs are mean  
1297  $\pm$  SD. See Figure 7-Tables 1-3 for values and statistical analyses.

1298

1299 **Figure 7-figure supplement 1. Disrupting the actin cytoskeleton impacts spatial**  
1300 **organization of Kv2.1-mediated ER-PM junctions.**

1301 TIRF image of a live HEK293T cell coexpressing GFP-Kv2.1 and DsRed2-ER5, prior to, and 15  
1302 min after, Latrunculin A (LatA) treatment. Scale bar in GFP-Kv2.1 Rest panel is 5  $\mu$ m and holds  
1303 for all panels. Graphs show values measured from cells before and after a 15-minute treatment

1304 with 10  $\mu$ M LatA. Top left graph. Mean ER-PM junction (EPJ) size. Top right graph: Mean Kv2.1  
1305 cluster size per cell. Bottom left graph. Number of ER-PM junctions (EPJs) per cell. Bottom right  
1306 graph. PCC values between Kv2.1 and DsRed2-ER5. Bars on all graphs are mean  $\pm$  SD. See  
1307 Figure 7-Tables 1-3 for values and statistical analyses.

1308

1309 **Figure 8. Kv2-containing ER-PM junctions colocalize with multiple components of**  
1310 **mammalian ER-PM junctions.**

1311 Upper panels. TIRF images of live HEK293T cells coexpressing GFP or DsRed-Kv2.2 and  
1312 representative members of the E-Syt, JP and STIM families of ER-localized PM tethers. Scale  
1313 bar in top left GFP-Kv2.2 panel is 5  $\mu$ m and holds for all panels in figure. Heat maps show pixel  
1314 overlap of GFP-Kv2.2 and ER-PM tether signals. The STIM1 sample was treated with 2  $\mu$ M  
1315 thapsigargin for 5 minutes prior to imaging. Graphs to right show PCC and MOC values of Kv2.2  
1316 and ER-PM tether signals. Bars are mean  $\pm$  SD. See Figure 8-Table 1 for values and statistical  
1317 analyses. Lower panels. TIRF images of live HEK293T cells coexpressing DsRed-Kv2.2, CFP-  
1318 CB5-FKBP, and Lyn11-FRB. Top row. Prior to rapamycin treatment (rest). Middle row. Same cell  
1319 immediately following 5  $\mu$ M rapamycin treatment (+Rap). Bottom row. Same cell after subsequent  
1320 15-minute treatment with 10  $\mu$ M LatA (+LatA). Panels to the right of each row are the  
1321 corresponding normalized fluorescence intensity values across the individual line scans depicted  
1322 by the white line in the merged images. Bottom graph shows PCC values between DsRed-Kv2.2  
1323 and CFP-CB5-FKBP signals. Bars are mean  $\pm$  SD. See Figure 8-Table 2 for values and statistical  
1324 analyses.

1325

1326 **Figure 8-figure supplement 1. Kv2s colocalize with multiple native components of ER-PM**  
1327 **junctions from the E-Syt, JP, and STIM families.**

1328 TIRF images of live HEK293T cells coexpressing GFP-Kv2.2 or DsRed-Kv2.2 (left panels) or  
1329 GFP-Kv2.1 or DsRed-Kv2.1 (right panels) and members of the E-Syt, JP and STIM families of

1330 ER-localized PM tethers. Heat maps show pixel overlap of Kv2 and ER-PM tether signals. The  
1331 STIM samples were treated with 2  $\mu$ M thapsigargin for 5 minutes prior to imaging. Scale bar in  
1332 top left GFP-Kv2.2 panel is 10  $\mu$ m and holds for all panels in figure. Graphs show PCC and MOC  
1333 values of Kv2.1 and ER-PM tether signals. Bars are mean  $\pm$  SD. See Figure 8-Table 3 for values  
1334 and statistical analyses.

1335

1336 **Figure 8-figure supplement 2. Orai1 translocates to Kv2.2-containing ER-PM junctions in**  
1337 **response to store depletion independent of exogenous STIM1 expression.**

1338 TIRF images of live HEK293T cells coexpressing DsRed-Kv2.2 and GFP-Orai1 with (left panels)  
1339 and without (right panels) BFP-STIM1 coexpression. For each set the same cell is shown prior to  
1340 and immediately after 5 min of treatment with 2  $\mu$ M Thapsigargin. Scale bar in top left DsRed-  
1341 Kv2.2 panel is 5  $\mu$ m and holds for all panels in figure. Bottom left graph. PCC values between  
1342 Orai1 and Kv2.2 (black) or STIM1 (red) measured from cells with BFP-STIM1 coexpression before  
1343 (Rest) and after (+Thap) Thapsigargin treatment. Bottom right graph. PCC values between Orai1  
1344 and Kv2.2 measured from cells without BFP-STIM1 coexpression before (Rest) and after (+Thap)  
1345 Thapsigargin treatment. Bars on all graphs are mean  $\pm$  SD. See Figure 8-Table 4 for values and  
1346 statistical analyses.

1347

1348 **Figure 8-figure supplement 3. Formation of enhanced ER-PM junctions in HEK293T cells**  
1349 **triggered by a rapamycin based heterodimerization strategy.**

1350 TIRF images of CFP fluorescence in a HEK293T cell coexpressing CFP-CB5-FKBP and lyn11-  
1351 FRB before (rest) and immediately after treatment with 5  $\mu$ M rapamycin. Scale bar is 5  $\mu$ m and  
1352 holds for all panels. Left graph shows fluorescence intensity of CFP-CB5-FKBP across the  
1353 individual line scan depicted by the white lines at rest and immediately following treatment with 5  
1354  $\mu$ M rapamycin.

1355



1356 **Figure 8-figure supplement 4. Enhanced ER-PM junctions triggered by a rapamycin based**  
1357 **heterodimerization strategy are mutually exclusive with Kv2.1 clusters in HEK293T cells.**

1358 Left panels. TIRF images of a live HEK293T cell coexpressing DsRed-Kv2.1, CFP-CB5-FKBP,  
1359 and Lyn11-FRB. Scale bar is 5  $\mu\text{m}$  and holds for all panels. Top row. Prior to rapamycin treatment  
1360 (rest). Middle row. Same cell immediately following 5  $\mu\text{M}$  rapamycin treatment (+Rap). Bottom  
1361 row. Same cell after subsequent 15-minute treatment with 10  $\mu\text{M}$  LatA (+LatA). Panels to the right  
1362 of each row shows the corresponding normalized fluorescence intensity values across the  
1363 individual line scans depicted by the white line in the merged images.

1364

1365 **Figure 9. Mutations that eliminate  $\text{K}^+$  conductance do not impact Kv2.2 channel clustering.**

1366 Top panels show exemplar whole-cell voltage clamp recordings (left) and corresponding graphs  
1367 of current levels versus command voltage (right) of HEK293T cells expressing GFP (control),  
1368 GFP-Kv2.2, or GFP-Kv2.2 P412W. Recordings shown are representative responses to 100 ms  
1369 steps from -100 mV to -40, 0 and +40 mV. Note the lack of outward currents in control and GFP-  
1370 Kv2.2 P412W recordings. Summary graph shows whole cell current at +40 mV. See Figure 9-  
1371 Table 1 for values and statistical analyses. Middle panel shows a deconvolved widefield image of  
1372 a live DIV 7-10 CHN expressing GFP-Kv2.2 P412W. Scale bar is 5  $\mu\text{m}$ . Graphs to the right are  
1373 measurements of mean cluster size per cell and CV values measured from CHNs expressing  
1374 GFP-Kv2.2 or GFP-Kv2.2 P412W. Bars are mean  $\pm$  SD. See Figure 9-Tables 2-3 for values and  
1375 statistical analyses. Bottom panels show TIRF images of live HEK293T cells expressing GFP-  
1376 Kv2.2 P412W and surface labeled with GxTX-633. Scale bar in the Kv2.2 P412W panel is 5  $\mu\text{m}$   
1377 and hold for all panels in row. The graph to the right shows comparisons of PCC measurements  
1378 of Kv2 and GxTX fluorescence from HEK293T cells expressing GFP-Kv2.2 and/or GFP-Kv2.2  
1379 P412W. Dashed line denotes a PCC value of 0.5. Bars are mean  $\pm$  SD. See Figure 9-Table 4 for  
1380 values and statistical analyses.

1381

1382 **Figure 9-figure supplement 1. Mutations that eliminate K<sup>+</sup> conductance do not impact Kv2.1**  
1383 **channel clustering.**

1384 Top panels show exemplar whole-cell voltage clamp recordings (left) and corresponding graphs  
1385 of current levels versus command voltage (right) of HEK293T cells expressing GFP-Kv2.1 or  
1386 GFP-Kv2.1 P404W. Recordings shown are representative responses to 100 ms steps from -100  
1387 mV to -40, 0 and +40 mV are shown on left. Note the lack of outward currents in GFP-Kv2.1  
1388 P404W recordings. Summary graph shows whole cell current at +40 mV. See Figure 9-Table 1  
1389 for values and statistical analyses. Middle panel shows a deconvolved widefield image of a live  
1390 DIV 7-10 CHN expressing GFP-Kv2.1 P404W. Scale bar is 5  $\mu$ m. Graphs to the right are  
1391 measurements of mean cluster size per cell or CV values. Bars are mean  $\pm$  SD; measured from  
1392 CHNs transfected with GFP-Kv2.1 or GFP-Kv2.1 P404W. See Figure 9-Tables 2-3 for values and  
1393 statistical analyses. Bottom panels show TIRF images of live HEK293T cells expressing GFP-  
1394 Kv2.1 P404W and surface labeled with GxTX-633. Scale bar in Kv2.1 P404W panel is 5  $\mu$ m and  
1395 holds for all panels in row. The graph to the right shows comparisons of PCC measurements of  
1396 Kv2 and GxTX fluorescence from cells expressing GFP-Kv2.1 and/or GFP-Kv2.1 P404W. Dashed  
1397 line denotes a PCC value of 0.5. Bars are mean  $\pm$  SD. See Figure 9-Table 4 for values and  
1398 statistical analyses.

1399

1400 **Figure 10. Separation of function point mutations show that clustering, but not conduction,**  
1401 **is necessary for Kv2.2-mediated remodeling of ER-PM junctions.**

1402 Left panels show TIRF images of live HEK293T cells expressing GFP-tagged Kv2.2 mutants  
1403 (nonconducting P412W and nonclustering S605A) and DsRed2-ER5. Scale bar is 5  $\mu$ m and holds  
1404 for all panels. Graphs to right show comparisons from cells expressing wild-type and mutant Kv2.2  
1405 isoforms (P412W or S605A); control refers to cells expressing DsRed2-ER5 alone. Top right  
1406 graph. Mean ER-PM junction (EPJ) size per cell. Middle right graph. Percent PM per cell occupied  
1407 by cortical ER. Lower right graph. PCC values between DsRed2-ER5 and wild-type (WT) and

1408 mutant Kv2.2 isoforms. Bars on all graphs are mean  $\pm$  SD. See Figure 10-Tables 1-3 for values  
1409 and statistical analyses. Bottom panels show exemplar whole-cell voltage clamp recordings (left)  
1410 and graphs of the corresponding normalized conductance-voltage relationship from HEK293T  
1411 cells expressing GFP-Kv2.2, or GFP-Kv2.2 S605A (right). Different colors represent data from  
1412 distinct cells. Recordings shown are representative responses to 200 ms steps from -100 mV to  
1413 -40, 0 and +40 mV. Bottom graph shows  $V_{mid}$  values. Note the lack of effect of the declustering  
1414 point mutation on the properties of the whole cell currents. See Figure 10-Tables 4-5 for values  
1415 and statistical analyses.

1416

1417 **Figure 10-figure supplement 1. Separation of function point mutations show that**  
1418 **clustering, but not conduction, is necessary for Kv2.1-mediated remodeling of ER-PM**  
1419 **junctions.**

1420 Left panels show TIRF images of live HEK293T cells expressing GFP-tagged Kv2.1 mutants and  
1421 DsRed2-ER5. Scale bar is 5  $\mu$ m and holds for all panels. Graphs show comparisons from cells  
1422 expressing wild-type and mutant Kv2.1 isoforms. Top right graph. Mean ER-PM junction (EPJ)  
1423 size per cell. Middle right graph. Percent PM per cell occupied by cortical ER. Lower right graph.  
1424 PCC values between DsRed2-ER5 and wild-type and mutant Kv2.1 isoforms. Bars are mean  $\pm$   
1425 SD. See Figure 10-Tables 1-3 for values and statistical analyses. Bottom panels show exemplar  
1426 whole-cell voltage clamp recordings (left) and graphs of the corresponding normalized  
1427 conductance-voltage relationship from HEK293T cells expressing GFP-Kv2.1, or GFP-Kv2.1  
1428 S586A. Different colors represent data from distinct cells. Recordings shown are representative  
1429 responses to 200 ms steps from -100 mV to -40, 0 and +40 mV. Bottom graph shows  $V_{mid}$  values.  
1430 Note the lack of effects of the declustering point mutations on the properties of the whole cell  
1431 currents. Bars are mean  $\pm$  SD. See Figure 10-Tables 4-5 for values and statistical analyses.

1432

1433 **Figure 10-figure supplement 2. Both wild-type and nonconducting Kv2 channel mutants**  
1434 **stabilize ER-PM junctions in HEK293T cells.**

1435 Left panels are TIRF images of DsRed2-ER5 expressed in live HEK293T cells with and without  
1436 coexpression of wild-type and mutant Kv2 channel isoforms as labeled. Scale bar is 2.5  $\mu\text{m}$  and  
1437 holds for all panels. Right panels are kymographs of DsRed2-ER5 mobility from regions indicated  
1438 by the lines in the adjacent panels. Graph to right shows ER-PM junction (EPJ) velocity (as  
1439 reported by DsRed2-ER5 in TIRF) as measured from kymographs. Bars are mean  $\pm$  SD. See  
1440 Figure 10-Table 6 for values and statistical analyses.

1441  
1442 **Figure 11. Kv2.2 but not Kv2.1 can organize ER-PM junctions in interphase COS-1 cells.**

1443 TIRF images of fixed interphase COS-1 cells stained with Hoechst 33258 and expressing  
1444 mCherry-SEC61 $\beta$  alone, or coexpressing Kv2.2 (immunolabeled with mAb N372B/60) or Kv2.1  
1445 (immunolabeling with mAb K89/34). Scale bar is 10  $\mu\text{m}$  and is for all panels. Panels to the right  
1446 are the normalized fluorescence intensity values across the individual line scans depicted by the  
1447 white line in the merged images. Top right graph is CV values of Kv2.2 or Kv2.1 measured from  
1448 interphase (I phase) or M phase cells. Bottom right graph is ER-PM junction (EPJ) size measured  
1449 from interphase cells coexpressing mCherry-SEC61 $\beta$  and either Kv2.2 or Kv2.1. Bars are mean  
1450  $\pm$  SD. See Figure 11-Tables 1-2 for values and statistical analyses.

1451  
1452 **Figure 11-figure supplement 1. Kv2.2 clusters in COS-1 cells during interphase and M-**  
1453 **phase.**

1454 Single optical sections of fixed interphase (top rows) or M phase (bottom rows) COS-1 cells  
1455 stained with Hoechst 33258 and expressing Kv2.2 (immunolabeled with mAb N372B/60) or Kv2.1  
1456 (immunolabeled with mAb K89/34). Scale bar in Kv2.1 interphase panel is 10  $\mu\text{m}$  and is for all  
1457 panels. Note chromatin morphologies characteristic of interphase or M phase nuclei as revealed  
1458 by Hoechst 33258 labeling.

1459 **Figure 12. Genetic ablation of Kv2.2 and Kv2.1 alters RyR localization in mouse brain**  
1460 **neurons.**

1461 Projected z-stack images of CA1 hippocampus from brain sections of wild-type (WT), Kv2.1  
1462 knockout (Kv2.1 KO), Kv2.2 knockout (Kv2.2 KO), or Kv2.1 and Kv2.2 double knockout  
1463 (Kv2.1/Kv2.2 dKO) mice immunolabeled for RyR, Kv2.2, and Kv2.1. Top row shows RyR, Kv2.2,  
1464 and Kv2.1 immunolabeling from WT mouse. Second row shows immunolabeling RyR and Kv2.2  
1465 immunolabeling from Kv2.1 KO mouse. Third row shows RyR and Kv2.1 immunolabeling from  
1466 Kv2.2 KO mouse. Fourth row shows RyR immunolabeling from Kv2.1/Kv2.2 dKO mouse. Scale  
1467 bar in WT RyR panel is 10  $\mu\text{m}$  and holds for all panels in set. Panels to the right of each row are  
1468 the corresponding normalized fluorescence intensity values across the individual line scans  
1469 depicted by the white line in the merged images. Bottom panels are enlarged selections of RyR-  
1470 labeling of WT and Kv2.1/Kv2.2 dKO images as indicated by boxes. Scale bar in WT RyR inset  
1471 panel is 1.25  $\mu\text{m}$  and holds for all panels in set. Panels to the right are binary/thresholded masks  
1472 generated during analysis of RyR cluster size. Graph to the right are measurements of individual  
1473 RyR cluster sizes. Bars are mean  $\pm$  SD. See Figure 12-Table 1 for values and statistical analyses.

1474

1475 **Movie 1.** Rotating 3D reconstruction of a fixed HEK293T cell expressing GFP-Kv2.2 (left panel,  
1476 green) and BFP-SEC61 $\beta$  (middle panel, magenta). Merged image is shown in right panel.

1477

**Figure 3-Table 1. Kv2 channels impact ER-PM junction size.**

| Sample  | ER-PM junction size ( $\mu\text{m}^2$ ) | n number | p-value (two-tailed, unpaired t-test)     |
|---------|-----------------------------------------|----------|-------------------------------------------|
| Kv2.2   | $1.98 \pm 0.97$                         | 12 cells | vs. control, ****, $7.164 \times 10^{-5}$ |
| Kv2.1   | $1.69 \pm 0.60$                         | 12 cells | vs. control, ****, $4.512 \times 10^{-6}$ |
| Kv1.4   | $0.49 \pm 0.20$                         | 12 cells | vs. control, ns, 0.3602                   |
| control | $0.57 \pm 0.25$                         | 12 cells | N/A                                       |

**Figure 3-Table 2. Kv2 channels impact PM occupancy by ER-PM junctions.**

| Sample  | PM occupancy (%) | n number | p-value (two-tailed, unpaired t-test)     |
|---------|------------------|----------|-------------------------------------------|
| Kv2.2   | $34.9 \pm 6.1$   | 12 cells | vs. control, ****, $4.680 \times 10^{-8}$ |
| Kv2.1   | $33.0 \pm 5.8$   | 12 cells | vs. control, ****, $1.634 \times 10^{-7}$ |
| Kv1.4   | $14.7 \pm 5.5$   | 12 cells | vs. control, ns, 0.4256                   |
| control | $16.4 \pm 5.0$   | 12 cells | N/A                                       |

**Figure 3-Table 3. Kv2 channels colocalize with near-PM ER.**

| Sample | PCC Kv: DsRed2-ER5 | n number | p-value (two-tailed, unpaired t-test)    |
|--------|--------------------|----------|------------------------------------------|
| Kv2.2  | $0.88 \pm 0.04$    | 15 cells | vs. Kv1.4, ****, $2.585 \times 10^{-21}$ |
| Kv2.1  | $0.87 \pm 0.08$    | 15 cells | vs. Kv1.4, ****, $5.768 \times 10^{-19}$ |
| Kv1.4  | $0.26 \pm 0.08$    | 15 cells | N/A                                      |

**Figure 5-Table 1. GxTX labeling of cell surface Kv2 channels.**

| Sample               | PCC with GxTX | n number | p-value (two-tailed, unpaired t-test)          |
|----------------------|---------------|----------|------------------------------------------------|
| Kv2.2                | 0.90 ± 0.06   | 13 cells | vs. DsRed2-ER5, *, 0.01211                     |
| DsRed2-ER5           | 0.78 ± 0.14   | 13 cells | N/A                                            |
| SEP-Kv2.1 (pHluorin) | 0.85 ± 0.06   | 10 cells | vs. mCherry, ns, 0.2802; vs. SEC61β, *, 0.0164 |
| SEP-Kv2.1 (mCherry)  | 0.86 ± 0.06   | 10 cells | vs. SEC61β, *, 0.0106                          |
| SEC61β               | 0.78 ± 0.11   | 10 cells | N/A                                            |

**Figure 6-Table 1. Lack of colocalization of Kv2 channel isoforms with the cortical actin cytoskeleton.**

| Sample       | PCC            | n number | p-value (two tailed, unpaired t-test) |
|--------------|----------------|----------|---------------------------------------|
| Kv2.2: actin | -0.095 ± 0.25  | 7 cells  | vs. Kv2.1:actin, ns, 0.8438           |
| Kv2.1: actin | -0.12 ± 0.23   | 7 cells  | N/A                                   |
| Kv2.2: ankG  | -0.27 ± 0.24   | 7 cells  | vs. Kv2.2:ankG, ns, 0.0679            |
| Kv2.1: ankG  | -0.0077 ± 0.25 | 7 cells  | N/A                                   |

**Figure 7-Table 1. Effects of LatA treatment on Kv2 and ER-PM junction (EPJ) cluster size.**

| Sample                | Size (μm <sup>2</sup> ) | n number | p-value (two tailed, paired t-test) |
|-----------------------|-------------------------|----------|-------------------------------------|
| Kv2.2 clusters before | 0.41 ± 0.12             | 7 cells  | vs. After LatA, ***, 0,0007         |
| Kv2.2 clusters after  | 1.01 ± 0.30             | 7 cells  | N/A                                 |
| Kv2.2-EPJ before      | 0.534 ± 0.12            | 7 cells  | vs. After LatA, **, 0.0043          |
| Kv2.2-EPJ after       | 0.90 ± 0.20             | 7 cells  | N/A                                 |
| Kv2.1 clusters before | 0.48 ± 0.19             | 7 cells  | vs. After LatA, *, 0.0150           |
| Kv2.1 clusters after  | 0.69 ± 0.18             | 7 cells  | N/A                                 |
| Kv2.1-EPJ before      | 0.64 ± 0.10             | 7 cells  | vs. After LatA, **, 0.0043          |
| Kv2.1-EPJ after       | 0.98 ± 0.22             | 7 cells  | N/A                                 |

**Figure 7-Table 2. Effects of LatA treatment on number of ER-PM junctions.**

| Sample           | Number of ER:PM junctions | n number | p-value (two tailed, paired t-test) |
|------------------|---------------------------|----------|-------------------------------------|
| Kv2.2-EPJ before | 104.29 ± 24.81            | 7 cells  | vs. After LatA, *, 0.0150           |
| Kv2.2-EPJ after  | 74.71 ± 11.04             | 7 cells  | N/A                                 |
| Kv2.1-EPJ before | 60.43 ± 16.69             | 7 cells  | vs. After LatA, *, 0.0161           |
| Kv2.1-EPJ after  | 51.14 ± 15.74             | 7 cells  | N/A                                 |

**Figure 7-Table 3. Effects of LatA treatment on Kv2 colocalization with DsRed2-ER5.**

| Sample       | PCC Kv2:DsRed2-ER5 | n number | p-value (two tailed, paired t-test) |
|--------------|--------------------|----------|-------------------------------------|
| Kv2.2 before | 0.84 ± 0.052       | 10 cells | vs. After LatA, ns, 0.2505          |
| Kv2.2 after  | 0.85 ± 0.055       | 10 cells | N/A                                 |
| Kv2.1 before | 0.82 ± 0.058       | 10 cells | vs. After LatA, ns, 0.4408          |
| Kv2.1 after  | 0.81 ± 0.064       | 10 cells | N/A                                 |

**Figure 8-Table 1. Kv2.2 colocalization with coexpressed ER tethers.**

| Sample | PCC with Kv2.2 | MOC with Kv2.2 | n number | PCC vs. MOC, p-value (two-tailed, paired t-test) |
|--------|----------------|----------------|----------|--------------------------------------------------|
| E-Syt1 | 0.90 ± 0.074   | 0.97 ± 0.020   | 19 cells | 1.487x10 <sup>-5</sup>                           |
| E-Syt2 | 0.52 ± 0.27    | 0.92 ± 0.045   | 17 cells | 1.149x10 <sup>-7</sup>                           |
| E-Syt3 | 0.69 ± 0.19    | 0.98 ± 0.034   | 17 cells | 3.797x10 <sup>-6</sup>                           |
| JP2    | 0.84 ± 0.13    | 0.99 ± 0.015   | 17 cells | 8.387x10 <sup>-6</sup>                           |
| JP4    | 0.90 ± 0.071   | 0.98 ± 0.013   | 18 cells | 3.941x10 <sup>-6</sup>                           |
| STIM1  | 0.79 ± 0.13    | 0.94 ± 0.031   | 21 cells | 7.523x10 <sup>-3</sup>                           |
| STIM2a | 0.76 ± 0.051   | 0.95 ± 0.025   | 19 cells | 1.964x10 <sup>-4</sup>                           |
| STIM2β | 0.82 ± 0.10    | 0.97 ± 0.016   | 17 cells | 2.417x10 <sup>-7</sup>                           |



**Figure 8-Table 2. Kv2.2 colocalization with induced ER-PM junctions.**

| Sample       | PCC Kv2: CB5-FKBP | n number | p-value (two tailed, paired t-test) |
|--------------|-------------------|----------|-------------------------------------|
| Kv2.2 Rest   | 0.86 ± 0.055      | 7 cells  | N/A                                 |
| Kv2.2 + Rap  | 0.19 ± 0.18       | 7 cells  | vs. Rest, ****, 0.00006706          |
| Kv2.2 + LatA | 0.14 ± 0.12       | 7 cells  | vs. Rap, ns, 0.3099                 |
| Kv2.1 Rest   | 0.90 ± 0.032      | 7 cells  | N/A                                 |
| Kv2.1 + Rap  | 0.42 ± 0.17       | 7 cells  | vs. Rest, ***, 0.0003273            |
| Kv2.1 + LatA | 0.38 ± 0.13       | 7 cells  | vs. Rap, ns, 0.6889                 |

**Figure 8-Table 3. Kv2.1 colocalization with coexpressed ER tethers.**

| Sample | PCC with Kv2.1 | MOC with Kv2.1 | n number | PCC vs. MOC, p-value (two-tailed, paired t-test) |
|--------|----------------|----------------|----------|--------------------------------------------------|
| E-Syt1 | 0.87 ± 0.068   | 0.97 ± 0.020   | 15 cells | 8.850x10 <sup>-5</sup>                           |
| E-Syt2 | 0.54 ± 0.23    | 0.93 ± 0.049   | 18 cells | 6.229x10 <sup>-6</sup>                           |
| E-Syt3 | 0.67 ± 0.15    | 0.94 ± 0.032   | 15 cells | 5.690x10 <sup>-6</sup>                           |
| JP2    | 0.59 ± 0.31    | 0.94 ± 0.068   | 19 cells | 1.058 x10 <sup>-4</sup>                          |
| JP4    | 0.83 ± 0.11    | 0.97 ± 0.023   | 18 cells | 7.894 x10 <sup>-5</sup>                          |
| STIM1  | 0.83 ± 0.20    | 0.93 ± 0.068   | 15 cells | 2.070 x10 <sup>-6</sup>                          |
| STIM2a | 0.77 ± 0.16    | 0.93 ± 0.052   | 14 cells | 1.1 x10 <sup>-14</sup>                           |
| STIM2β | 0.71 ± 0.12    | 0.93 ± 0.032   | 15 cells | 2.949 x10 <sup>-6</sup>                          |

**Figure 8-Table 4. Store depletion results in increased colocalization of Kv2.2 and Orai1.**

| Sample                      | PCC with Orai1 | n number | p-value (two tailed, paired t-test) |
|-----------------------------|----------------|----------|-------------------------------------|
| STIM1 (Rest)                | 0.17 ± 0.26    | 12 cells | N/A                                 |
| STIM1 (After Thap)          | 0.61 ± 0.19    | 12 cells | vs. Rest, ***, 0.0005092            |
| Kv2.2 (Rest) + STIM1        | 0.21 ± 0.26    | 12 cells | N/A                                 |
| Kv2.2 (After Thap) + STIM1  | 0.39 ± 0.19    | 12 cells | vs. Rest, *, 0.02501                |
| Kv2.2 (Rest) no STIM1       | 0.018 ± 0.29   | 16 cells | N/A                                 |
| Kv2.2 (After Thap) no STIM1 | 0.32 ± 0.31    | 16 cells | vs. Rest, ****, 0.00003238          |

**Figure 9-Table 1. Whole cell current levels of conducting and nonconducting Kv2 channels.**

| Sample          | Current at +40 mV (nA) | n number | p-value (two-tailed, unpaired t-test) |
|-----------------|------------------------|----------|---------------------------------------|
| GFP-Kv2.2       | 5.88 ± 2.31            | 7 cells  | vs. GFP, ***, 0.000762                |
| GFP-Kv2.2 P412W | 0.70 ± 0.31            | 5 cells  | vs. GFP, ns, 0.123                    |
| GFP-Kv2.1       | 9.98 ± 4.93            | 9 cells  | vs. GFP, ***, 0.000399                |
| GFP-Kv2.1 P404W | 0.57 ± 0.27            | 6 cells  | vs. GFP, ns, 0.287                    |
| GFP             | 0.42 ± 0.16            | 7 cells  | N/A                                   |

**Figure 9-Table 2. Clustering of conducting and nonconducting Kv2 channels.**

| Sample          | Cluster size (µm <sup>2</sup> ) | n number | p-value (two-tailed, unpaired t-test) |
|-----------------|---------------------------------|----------|---------------------------------------|
| GFP-Kv2.2 P412W | 0.76 ± 0.91                     | 3 cells  | vs. GFP-Kv2.2, ns, 0.0637             |
| GFP-Kv2.2       | 0.99 ± 1.14                     | 3 cells  | N/A                                   |
| GFP-Kv2.1 P404W | 0.59 ± 0.84                     | 3 cells  | vs. GFP-Kv2.1, ns, 0.9441             |
| GFP-Kv2.1       | 0.59 ± 0.79                     | 3 cells  | N/A                                   |

**Figure 9-Table 3. Coefficient of variation of conducting and nonconducting Kv2 channels.**

| Sample          | CV          | n number | p-value (two-tailed, unpaired t-test) |
|-----------------|-------------|----------|---------------------------------------|
| GFP-Kv2.2 P412W | 0.64 ± 0.21 | 3 cells  | vs. GFP-Kv2.2, ns, 0.3785             |
| GFP-Kv2.2       | 0.55 ± 0.22 | 3 cells  | N/A                                   |
| GFP-Kv2.1 P404W | 0.77 ± 0.19 | 3 cells  | vs. GFP-Kv2.1, ns, 0.9317             |
| GFP-Kv2.1       | 0.76 ± 0.30 | 3 cells  | N/A                                   |

**Figure 9-Table 4. Cell surface expression of conducting and nonconducting Kv2 channels.**

| Sample          | PCC with GxTX | n number | p-value (two-tailed, unpaired t-test) |
|-----------------|---------------|----------|---------------------------------------|
| GFP-Kv2.2 P412W | 0.88 ± 0.050  | 10 cells | vs. GFP-Kv2.2, ns, 0.1531             |
| GFP-Kv2.2       | 0.91 ± 0.039  | 10 cells | N/A                                   |
| GFP-Kv2.1 P404W | 0.91 ± 0.055  | 10 cells | vs. GFP-Kv2.1, ns, 0.0863             |
| GFP-Kv2.1       | 0.94 ± 0.030  | 10 cells | N/A                                   |

**Figure 10-Table 1. Impact of Kv2 channel isoforms on ER-PM junction size.**

| Sample           | ER-PM junction size ( $\mu\text{m}^2$ ) | n number | p-value (two-tailed, unpaired t-test)              |
|------------------|-----------------------------------------|----------|----------------------------------------------------|
| GFP-Kv2.2 (WT)   | 1.36 ± 0.65                             | 10 cells | vs. control, ***, 0.000993                         |
| GFP-Kv2.2 P412W  | 1.45 ± 0.81                             | 10 cells | vs. Kv2.2 ns, 0.7909; vs. control, **, 0.002283    |
| GFP-Kv2.2A S605A | 0.40 ± 0.11                             | 10 cells | vs. control, ns, 0.1081                            |
| GFP-Kv2.1 (WT)   | 1.38 ± 0.79                             | 10 cells | vs. control, **, 0.003550                          |
| GFP-Kv2.1 P404W  | 1.26 ± 0.49                             | 10 cells | vs. Kv2.1, ns, 0.6959; vs. control, ***, 0.0002729 |
| GFP-Kv2.1 S586A  | 0.47 ± 0.081                            | 10 cells | vs. control, ns, 0.5207                            |
| Control          | 0.52 ± 0.19                             | 10 cells | N/A                                                |

**Figure 10-Table 2. Impact of Kv2 channel isoforms on PM occupancy by ER-PM junctions.**

| Sample          | PM coverage (%) | n number | p-value (two-tailed, unpaired t-test)              |
|-----------------|-----------------|----------|----------------------------------------------------|
| GFP-Kv2.2 (WT)  | 29.8 ± 7.0      | 10 cells | vs. control, ***, 0.0001991;                       |
| GFP-Kv2.2 P412W | 29.4 ± 6.4      | 10 cells | vs. Kv2.2, ns, 0.8804; vs. control, ***, 0.0001749 |
| GFP-Kv2.2 S605A | 12.1 ± 4.8      | 10 cells | vs. control, ns, 0.1541                            |
| GFP-Kv2.1 (WT)  | 30.1 ± 7.0      | 10 cells | vs. control, ***, 0.0001610                        |
| GFP-Kv2.1 P404W | 28.6 ± 6.8      | 10 cells | vs. Kv2.1, ns, 0.6315; vs. control, ***, 0.0004477 |
| GFP-Kv2.1 S586A | 15.4 ± 2.6      | 10 cells | vs. control, ns, 0.8293                            |
| Control         | 15.9 ± 6.4      | 10 cells | N/A                                                |

**Figure 10-Table 3. Colocalization of Kv2 channel isoforms with near-PM ER.**

| Sample          | PCC with DsRed2-ER5 | n number | p-value (two-tailed, unpaired t-test)                                                              |
|-----------------|---------------------|----------|----------------------------------------------------------------------------------------------------|
| GFP-Kv2.2 (WT)  | 0.86 ± 0.04         | 12 cells | N/A                                                                                                |
| GFP-Kv2.2 P412W | 0.88 ± 0.04         | 12 cells | vs. GFP-Kv2.2, ns, 0.1813                                                                          |
| GFP-Kv2.2 S605A | 0.44 ± 0.14         | 12 cells | vs. GFP-Kv2.2, ****, $1.302 \times 10^{-9}$<br>vs. GFP-Kv2.2 P412W, ****, $4.101 \times 10^{-10}$  |
| GFP-Kv2.1 (WT)  | 0.86 ± 0.06         | 10 cells | N/A                                                                                                |
| GFP-Kv2.1 P404W | 0.86 ± 0.07         | 10 cells | vs. GFP-Kv2.1, ns, 0.8973                                                                          |
| GFP-Kv2.1 S586A | 0.26 ± 0.17         | 10 cells | vs. GFP-Kv2.1, ****, $1.681 \times 10^{-10}$<br>vs. GFP-Kv2.1 P404W, ****, $2.106 \times 10^{-10}$ |

**Figure 10-Table 4. Midpoint of voltage activation of Kv2 channel isoforms.**

| Sample          | $V_{mid}$        | n number | p-value (two tailed, unpaired t-test) |
|-----------------|------------------|----------|---------------------------------------|
| GFP-Kv2.2       | 17.34 ± 3.08 mV  | 6 cells  | N/A                                   |
| GFP-Kv2.2 S605A | 13.43 ± 3.10 mV  | 5 cells  | vs. Kv2.2, ns, 0.067                  |
| GFP-Kv2.1       | -10.09 ± 2.70 mV | 5 cells  | N/A                                   |
| GFP-Kv2.1 S586A | -8.76 ± 4.90 mV  | 4 cells  | vs. Kv2.1, ns, 0.649                  |

**Figure 10-Table 5. Normalized whole cell current levels of Kv2 channel isoforms.**

| Sample          | $I_K$ at +50 mV (pA/pF) | n number | p-value (two tailed, unpaired t-test) |
|-----------------|-------------------------|----------|---------------------------------------|
| GFP-Kv2.2       | 70.39 ± 41.67           | 6 cells  | N/A                                   |
| GFP-Kv2.2 S605A | 51.11 ± 36.34           | 5 cells  | vs. Kv2.2, ns, 0.434                  |
| GFP-Kv2.1       | 68.89 ± 17.95           | 5 cells  | N/A                                   |
| GFP-Kv2.1 S586A | 80.89 ± 23.85           | 4 cells  | vs. Kv2.1, ns, 0.438                  |

**Figure 10-Table 6. Impact of Kv2 channel isoforms on mobility of near-PM ER.**

| Sample          | ER-PM junction velocity ( $\mu\text{m}/\text{sec}$ ) | n number | p-value (two tailed, unpaired t-test)                             |
|-----------------|------------------------------------------------------|----------|-------------------------------------------------------------------|
| GFP-Kv2.2       | 0.069 ± 0.019                                        | 3 cells  | vs. control, ****, $5.841 \times 10^{-10}$                        |
| GFP-Kv2.2 P412W | 0.067 ± 0.018                                        | 3 cells  | vs. Kv2.2, ns, 0.5890; vs. control, $1.764 \times 10^{-11}$       |
| GFP-Kv2.1       | 0.062 ± 0.015                                        | 3 cells  | vs. control, ****, $7.481 \times 10^{-16}$                        |
| GFP-Kv2.1 P404W | 0.066 ± 0.017                                        | 3 cells  | vs. Kv2.1, ns, 0.2109; vs. control, ****, $1.504 \times 10^{-12}$ |
| Control         | 0.093 ± 0.020                                        | 3 cells  | N/A                                                               |

**Figure 11-Table 1. Effects of cell cycle on Kv2 channel clustering.**

| Sample          | CV          | n number | p-value (two tailed, unpaired t-test) |
|-----------------|-------------|----------|---------------------------------------|
| Kv2.1 (I phase) | 0.75 ± 0.54 | 6 cells  | N/A                                   |
| Kv2.2 (I phase) | 1.66 ± 0.33 | 6 cells  | vs. Kv2.1 (I phase), **, 0.005488     |
| Kv2.1 (M phase) | 1.12 ± 0.21 | 6 cells  | N/A                                   |
| Kv2.2 (M phase) | 1.12 ± 0.25 | 6 cells  | vs. Kv2.1 (M phase), ns, 0.9780       |

**Figure 11-Table 2. EPJ size in interphase cells.**

| Sample  | ER-PM junction size ( $\mu\text{m}^2$ ) | n number | p-value (two tailed, unpaired t-test) |
|---------|-----------------------------------------|----------|---------------------------------------|
| Kv2.2   | $1.37 \pm 0.61$                         | 3 cells  | vs. control, ****, 0.000003614        |
| Kv2.1   | $0.70 \pm 0.44$                         | 3 cells  | vs. control, ns, 0.1434               |
| control | $0.69 \pm 0.39$                         | 3 cells  | N/A                                   |

**Figure 12-Table 1. Reduced RyR cluster size in CA1 pyramidal neurons in Kv2 dKO mice.**

| Sample  | RyR cluster size ( $\mu\text{m}^2$ ) | n number  | p-value (two tailed, unpaired t-test) |
|---------|--------------------------------------|-----------|---------------------------------------|
| WT      | $0.22 \pm 0.012$                     | 3 animals | N/A                                   |
| Kv2.1KO | $0.21 \pm 0.0075$                    | 3 animals | vs. WT, ns, 0.0884                    |
| Kv2.2KO | $0.22 \pm 0.012$                     | 2 animals | vs. WT, ns, 0.5506                    |
| Kv2 dKO | $0.17 \pm 0.039$                     | 3 animals | vs. WT, *, 0.0199                     |

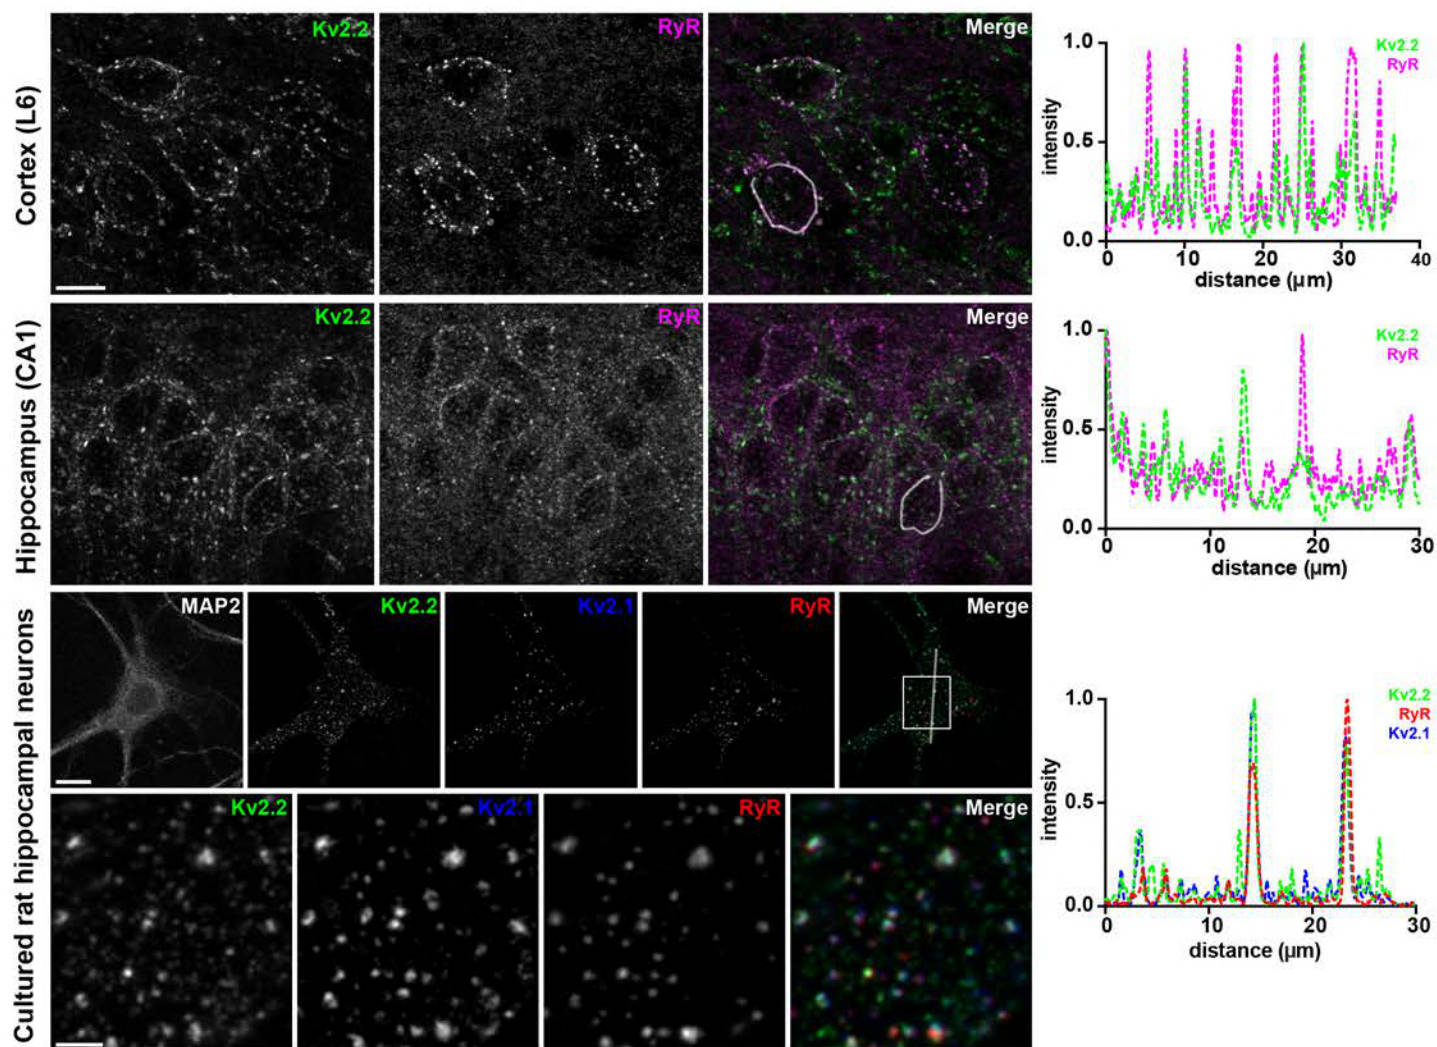

Figure 1

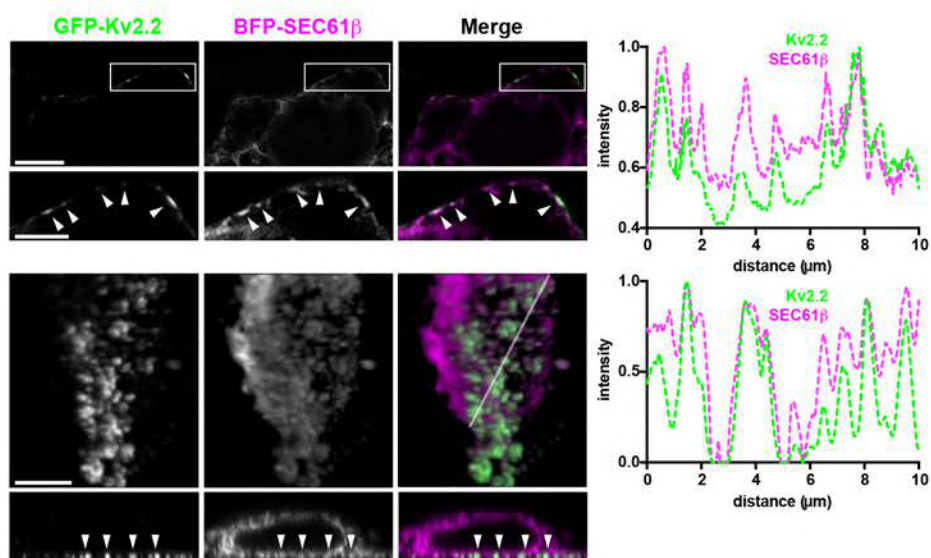

Figure 2



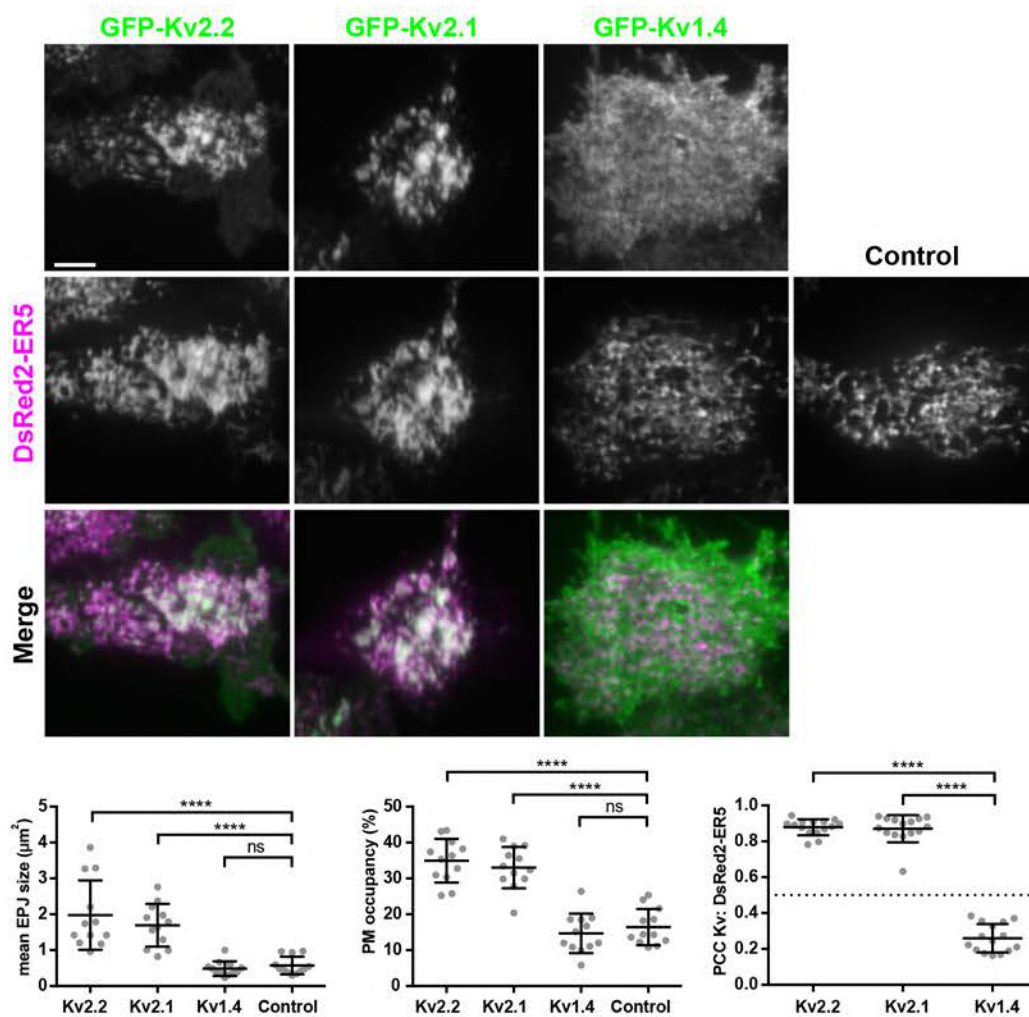

Figure 3

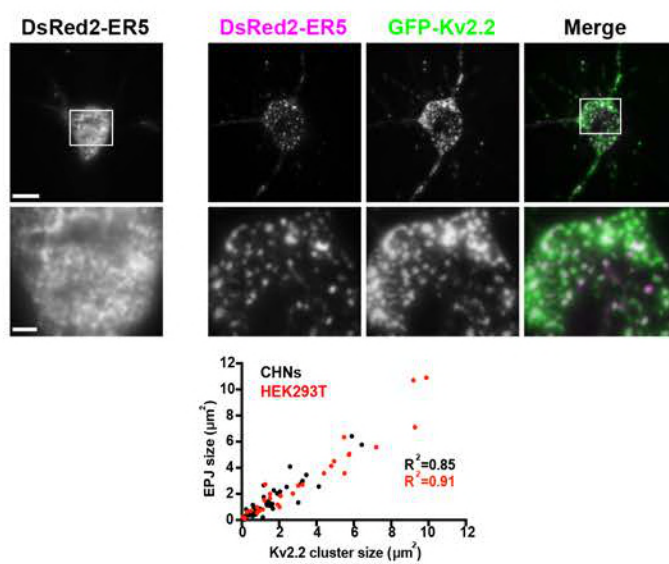

Figure 4

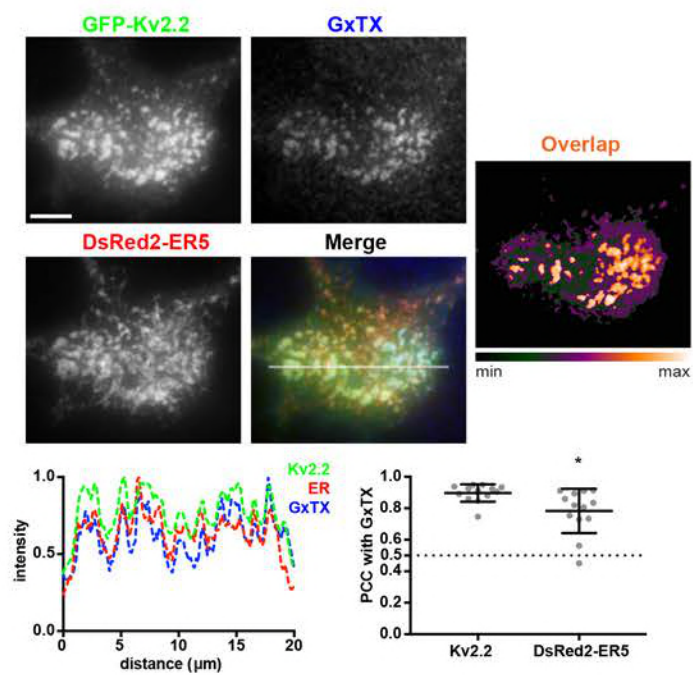

Figure 5

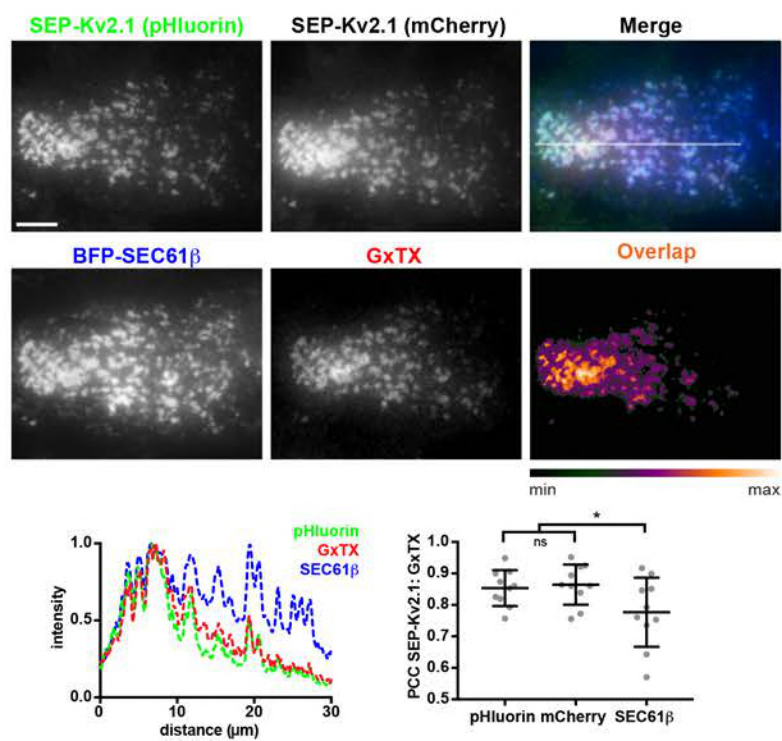

Figure 5-figure supplement 1

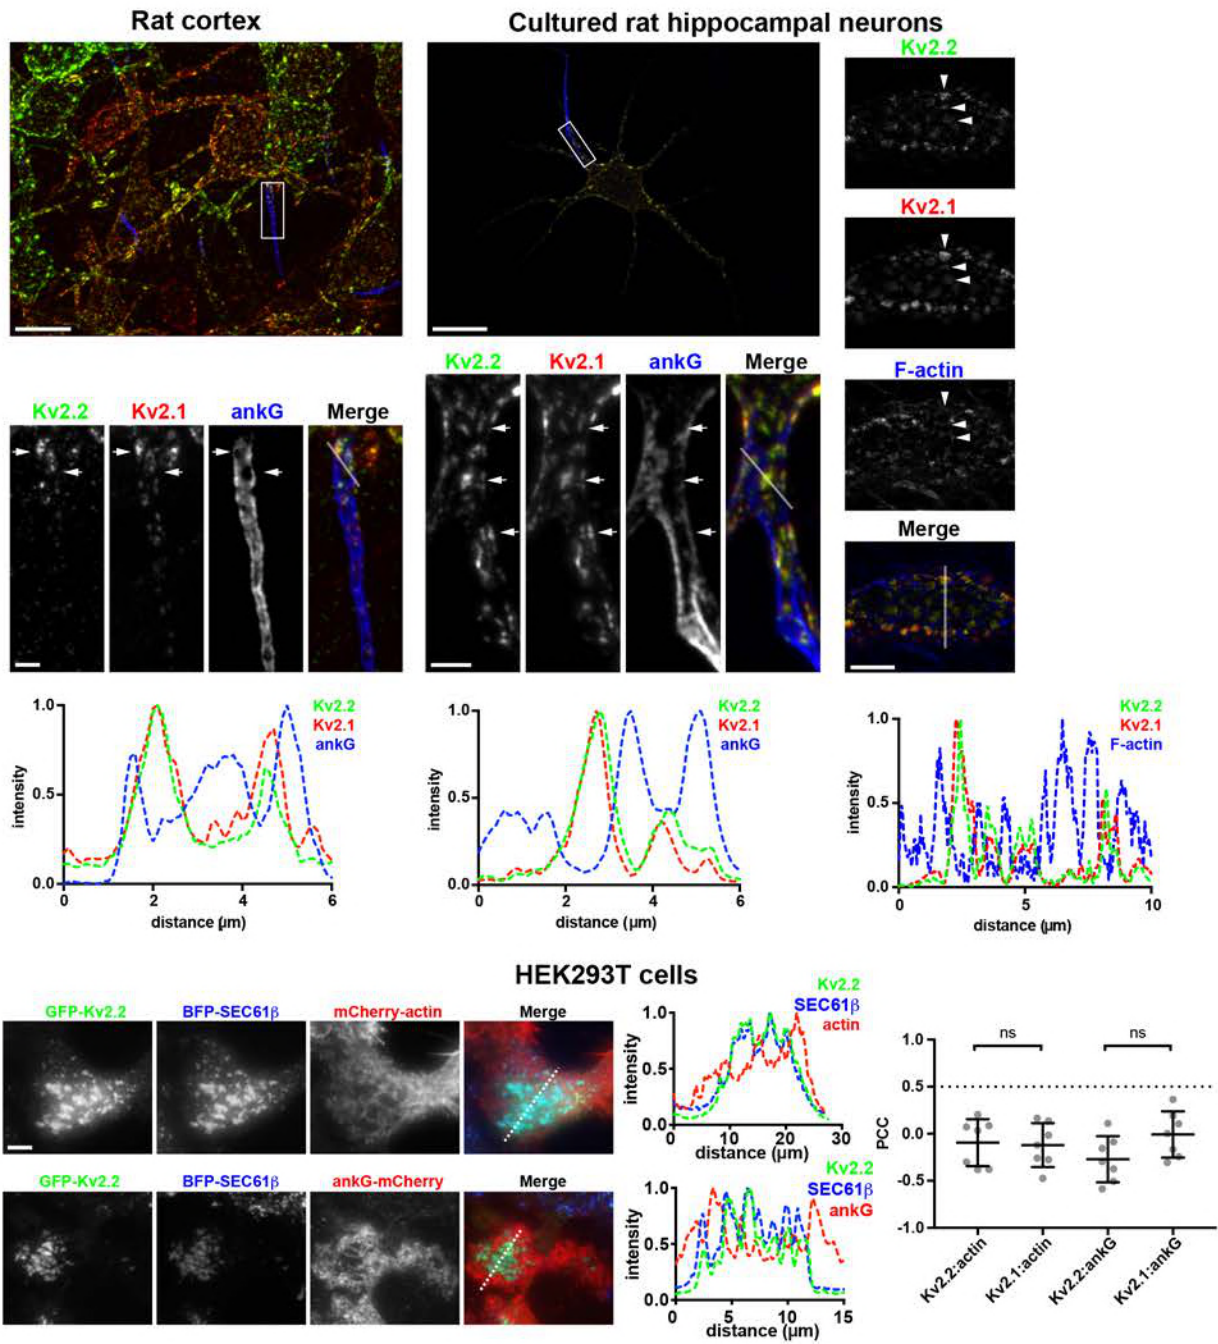

Figure 6

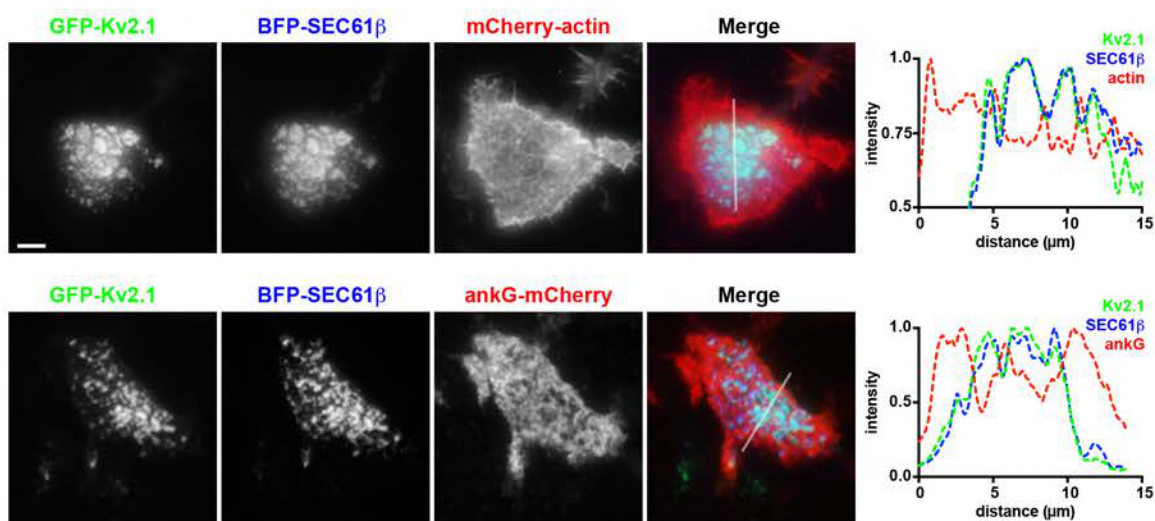

Figure 6-figure supplement 1

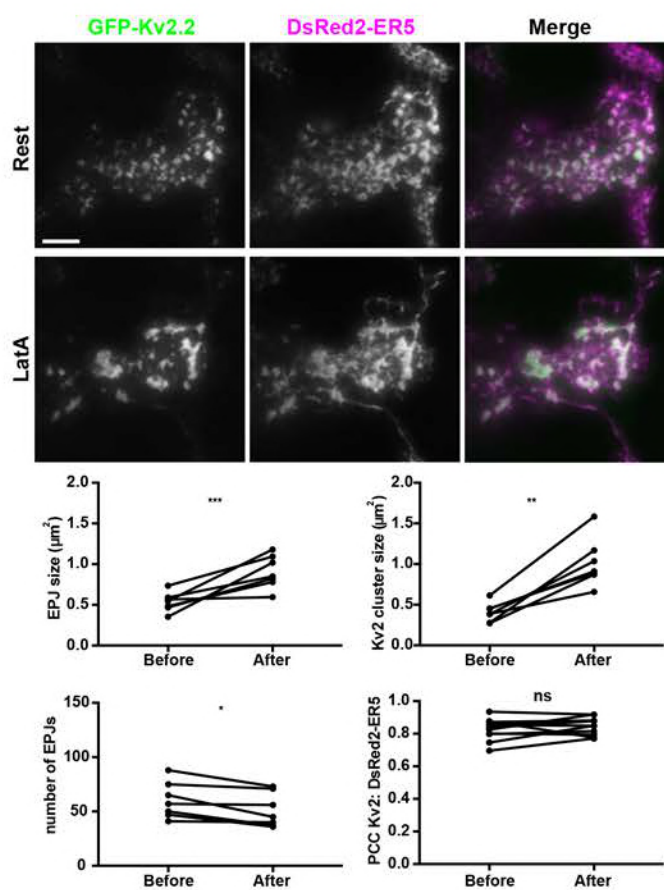

Figure 7

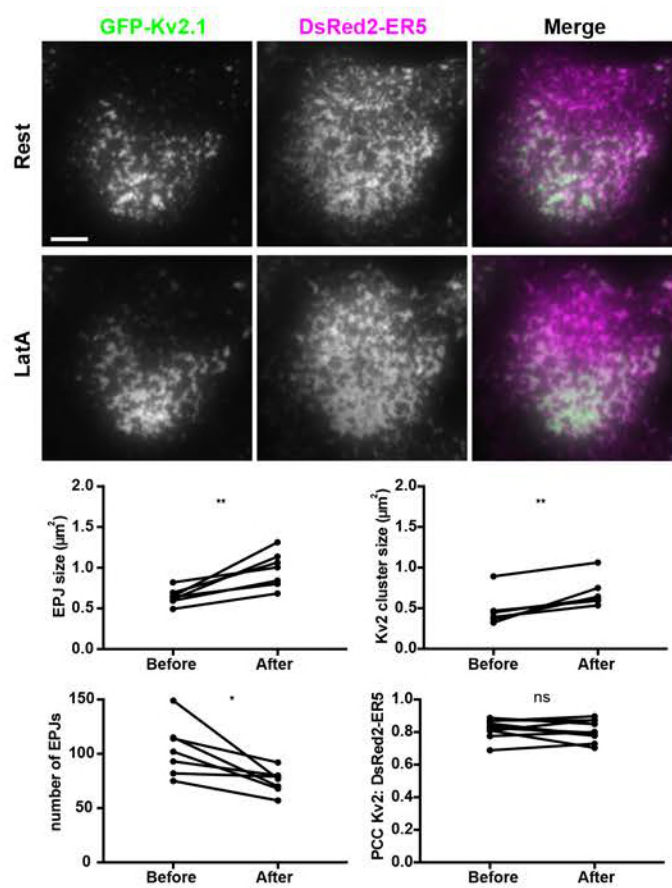

Figure 7-figure supplement 1



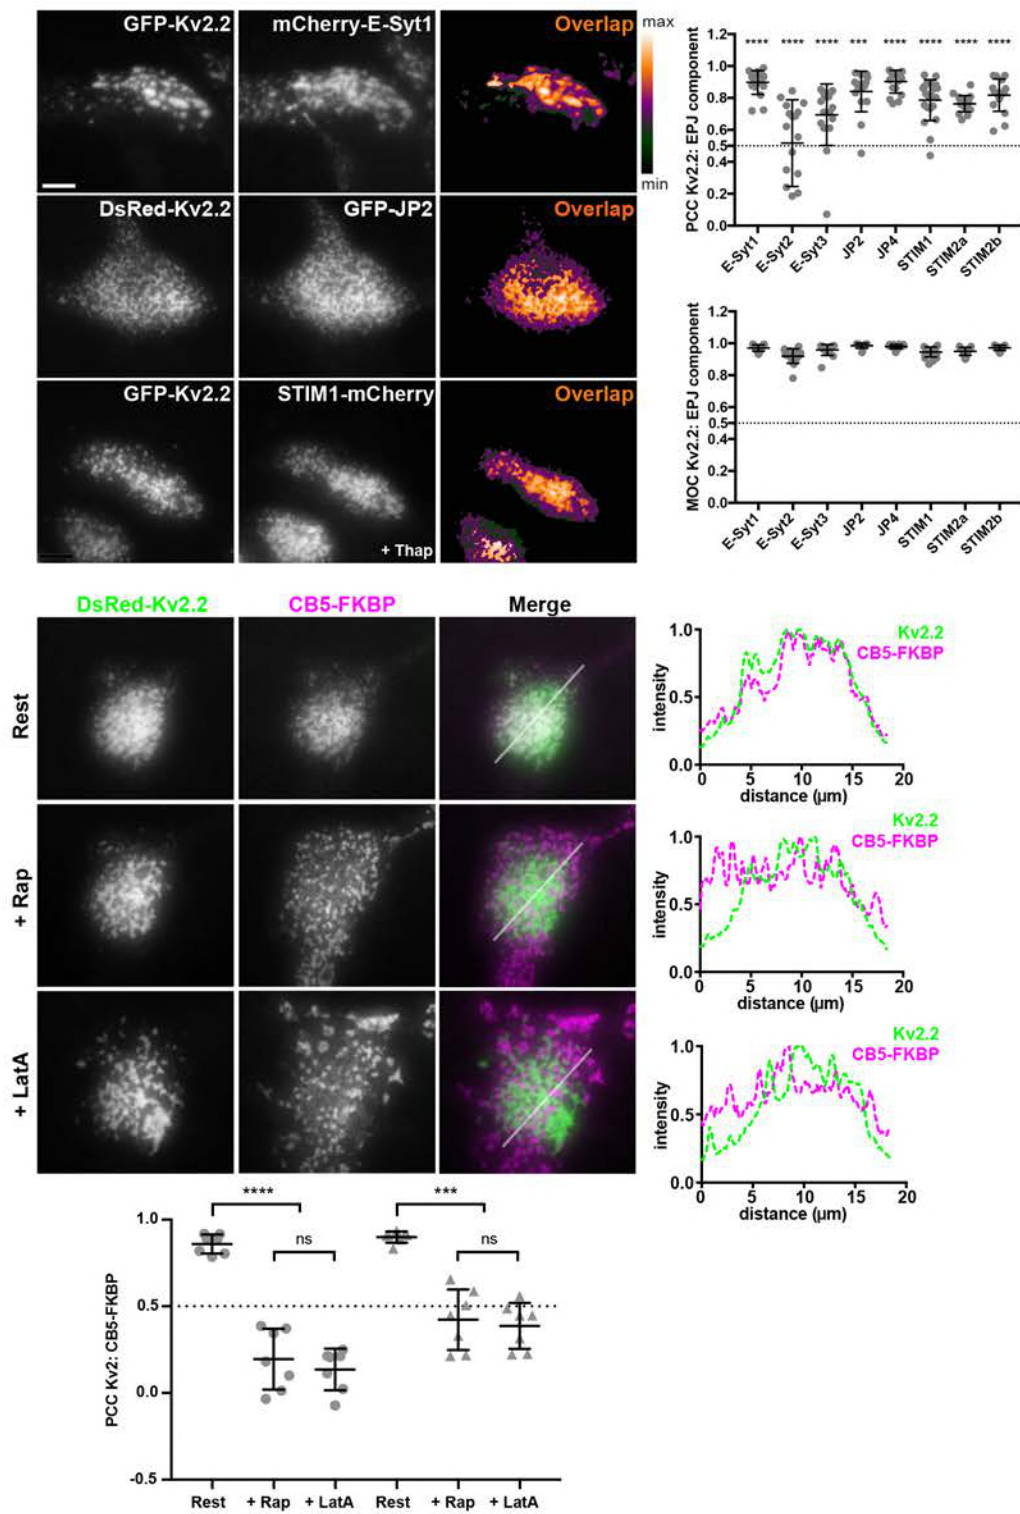

Figure 8

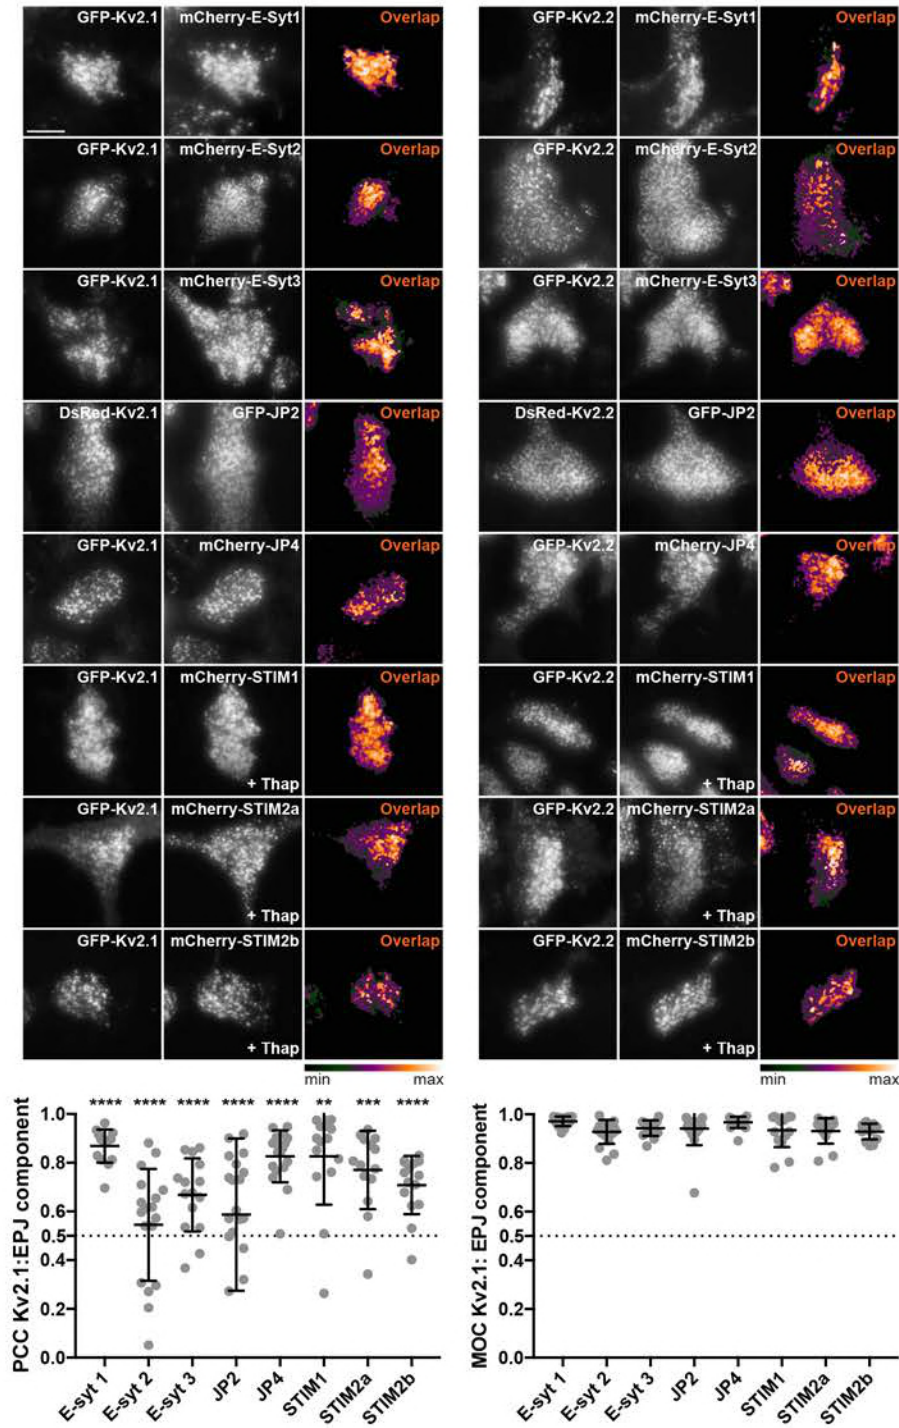

Figure 8-figure supplement 1

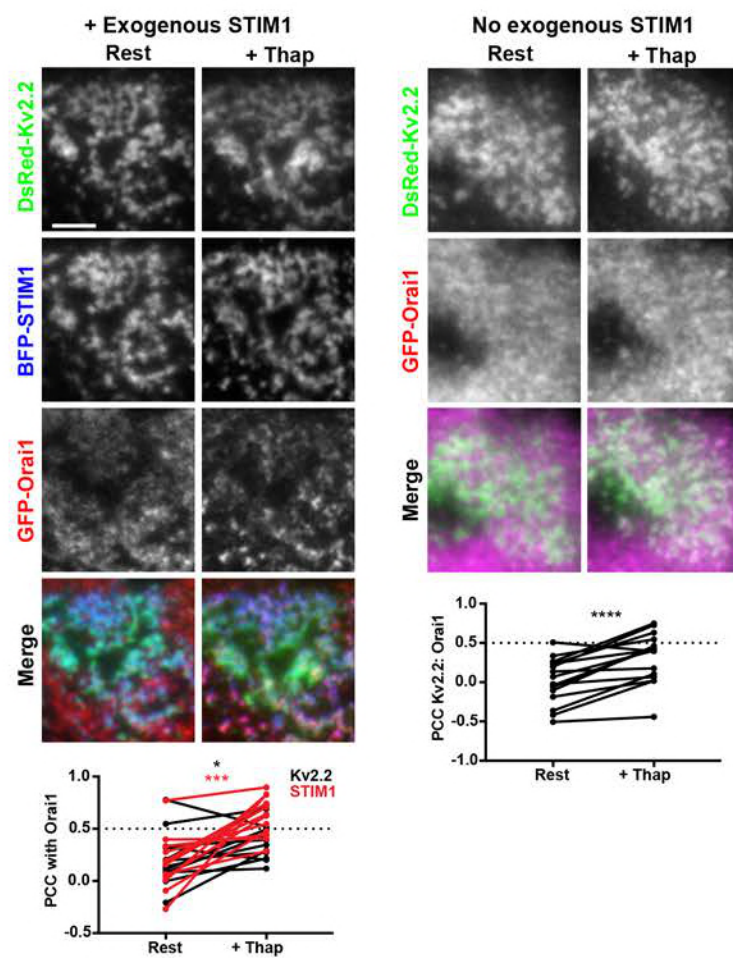

Figure 8-figure supplement 2

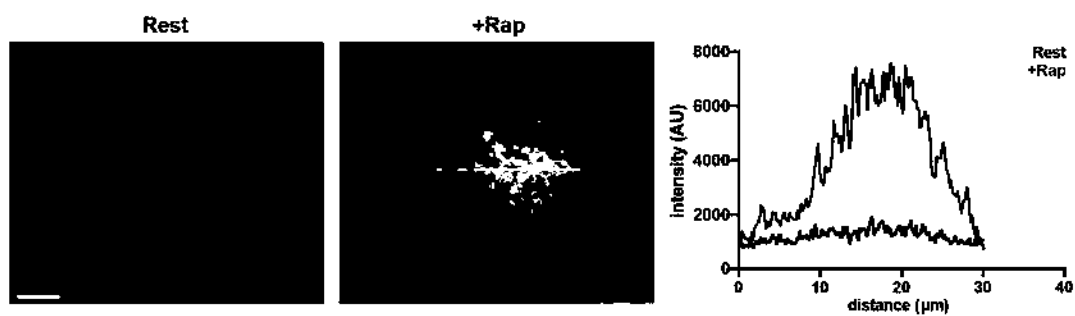

Figure 8-figure supplement 3

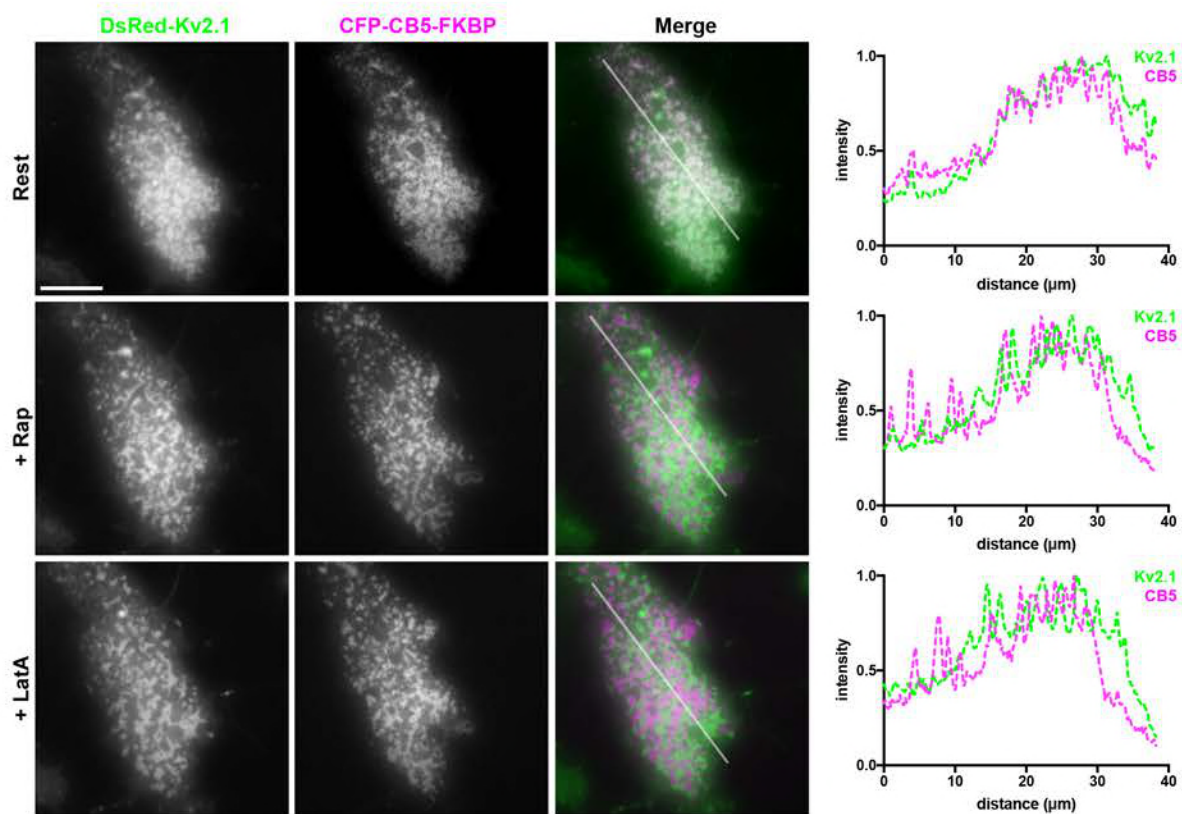

Figure 8-figure supplement 4

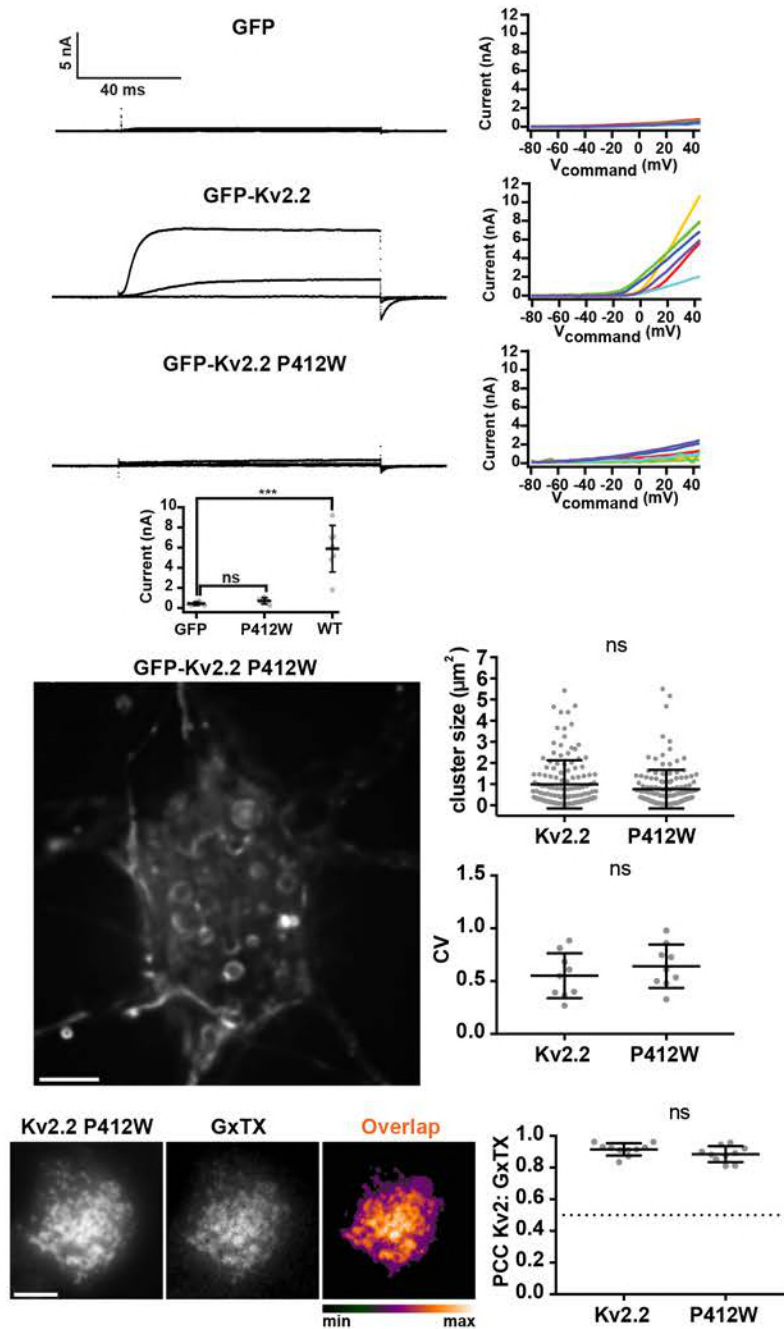

Figure 9

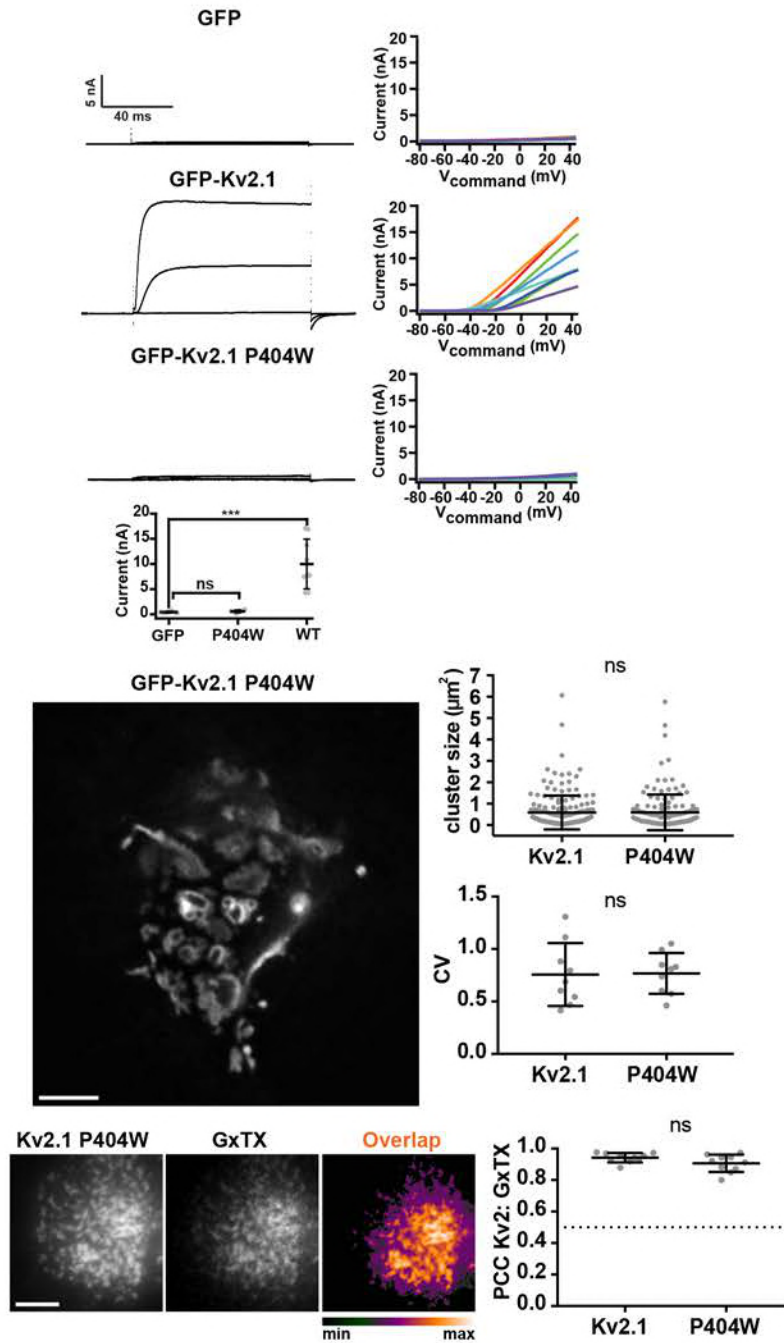

Figure 9-figure supplement 1

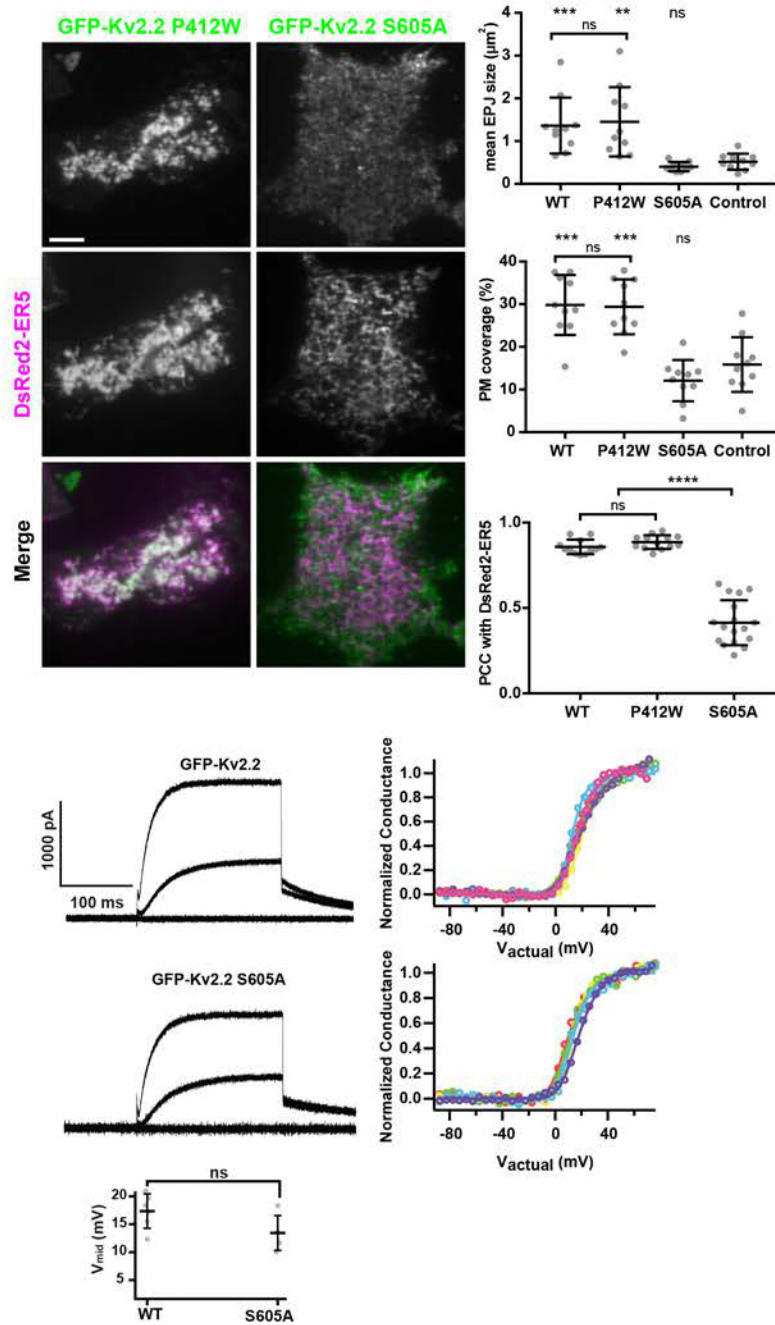

Figure 10



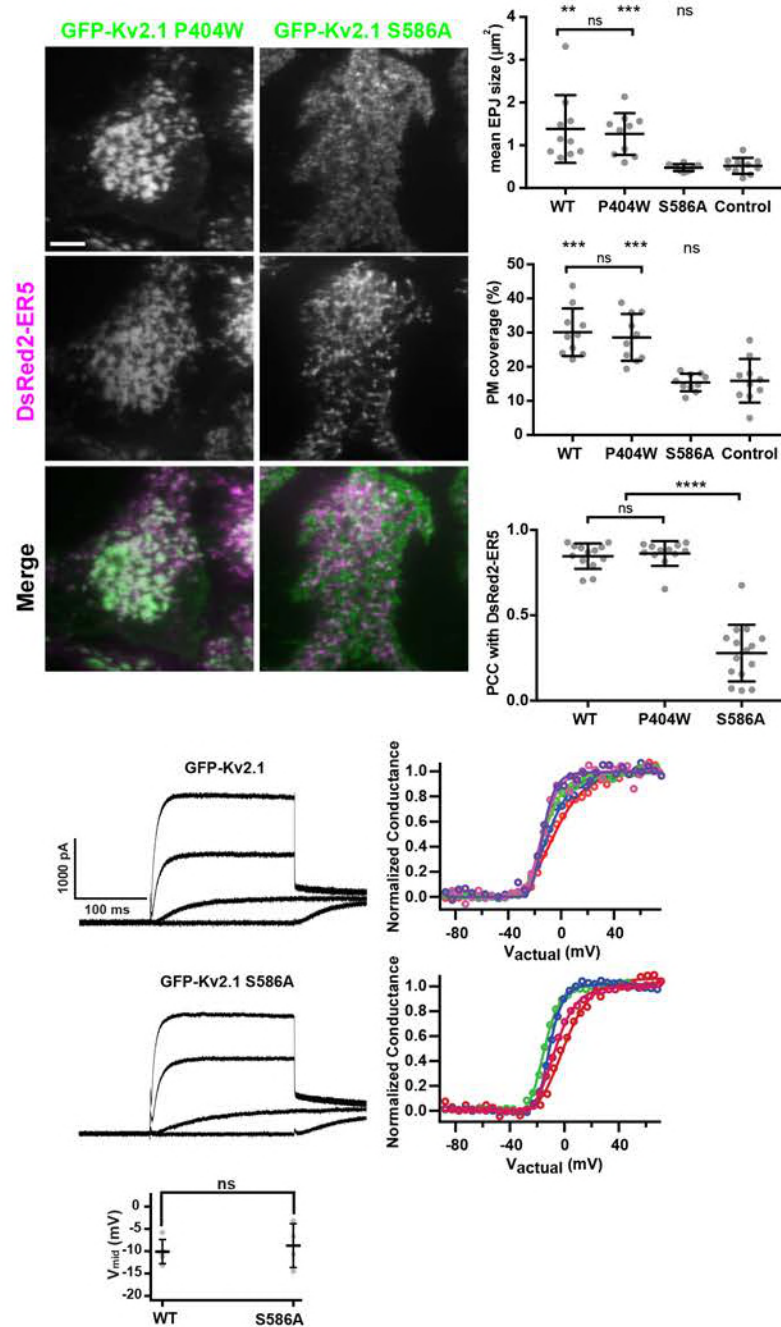

Figure 10-figure supplement 1

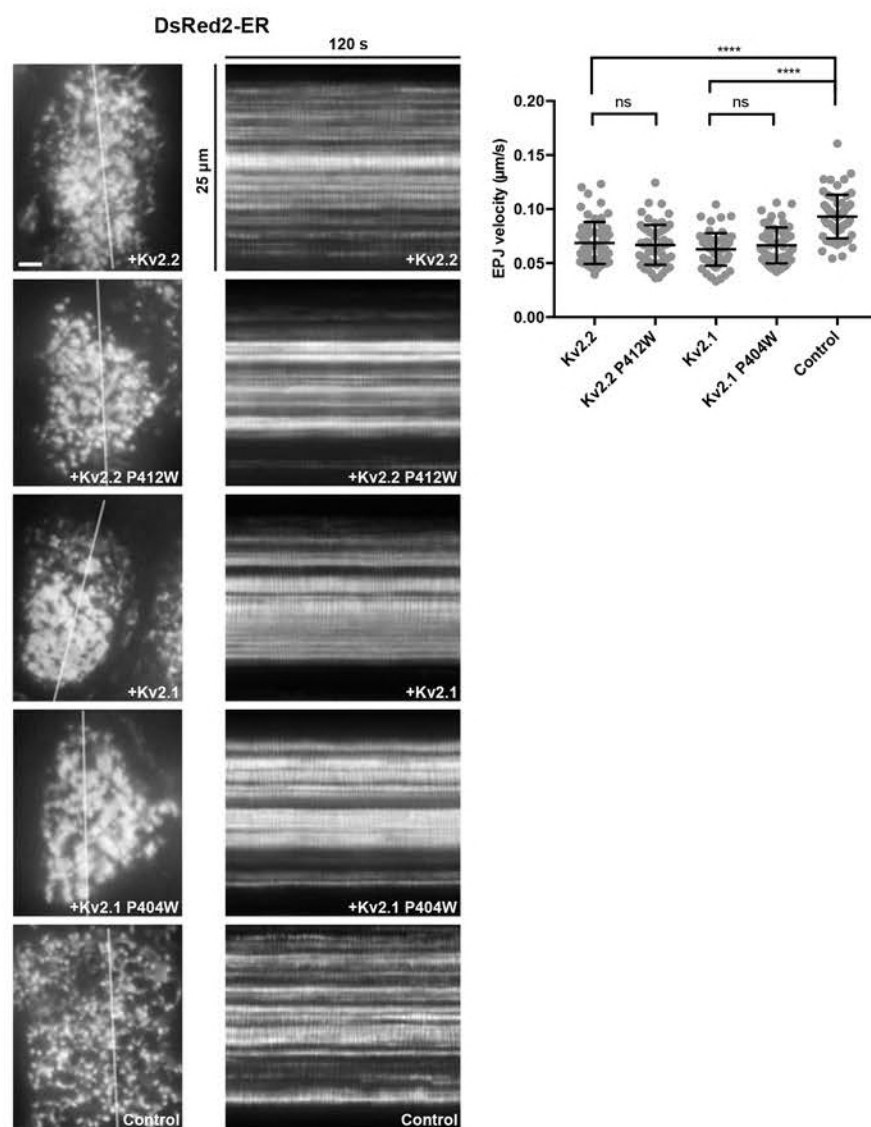

Figure 10-figure supplement 2

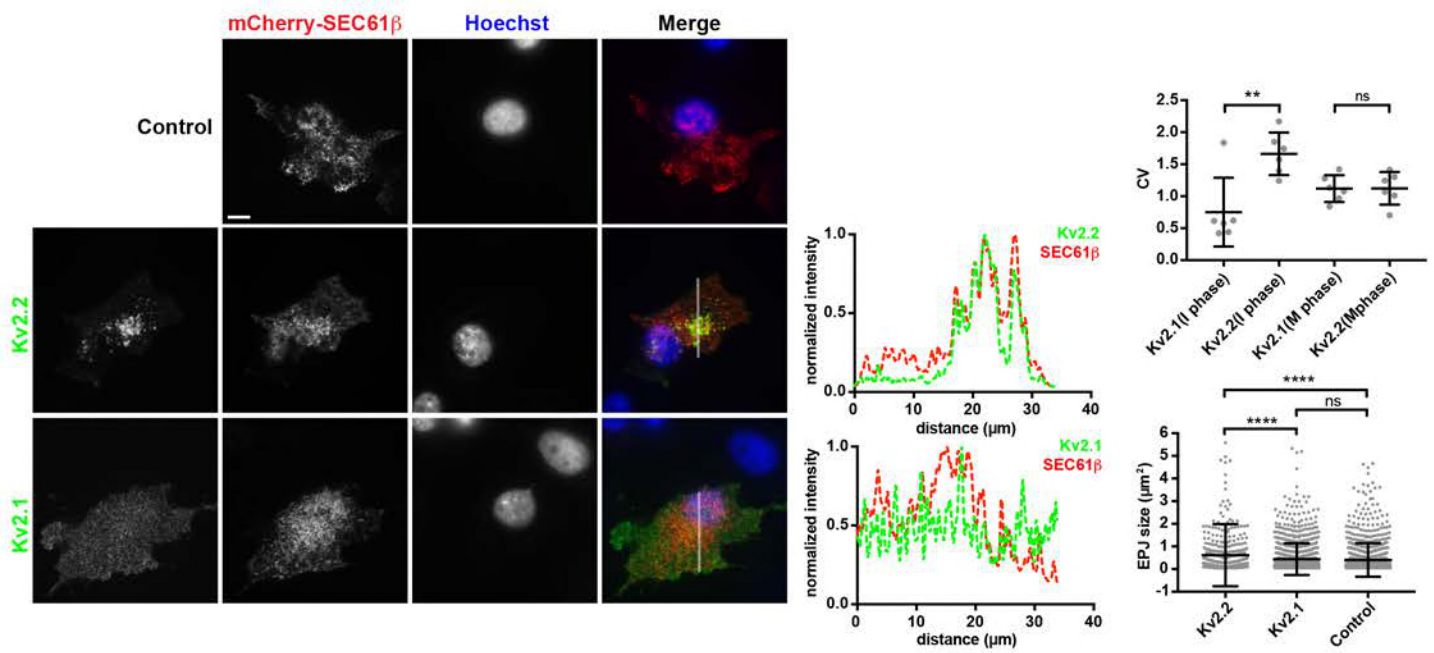

Figure 11

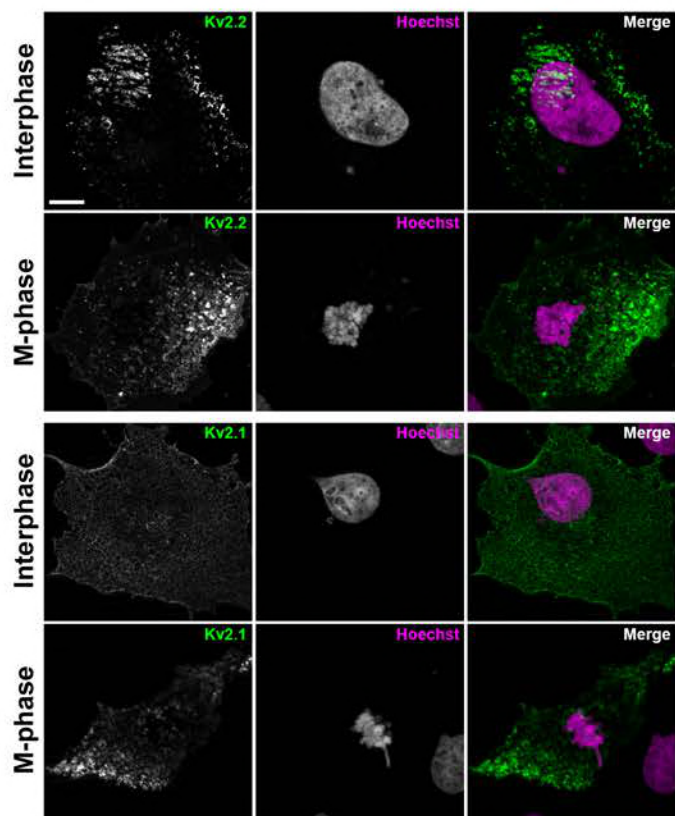

Figure 11-figure supplement 1

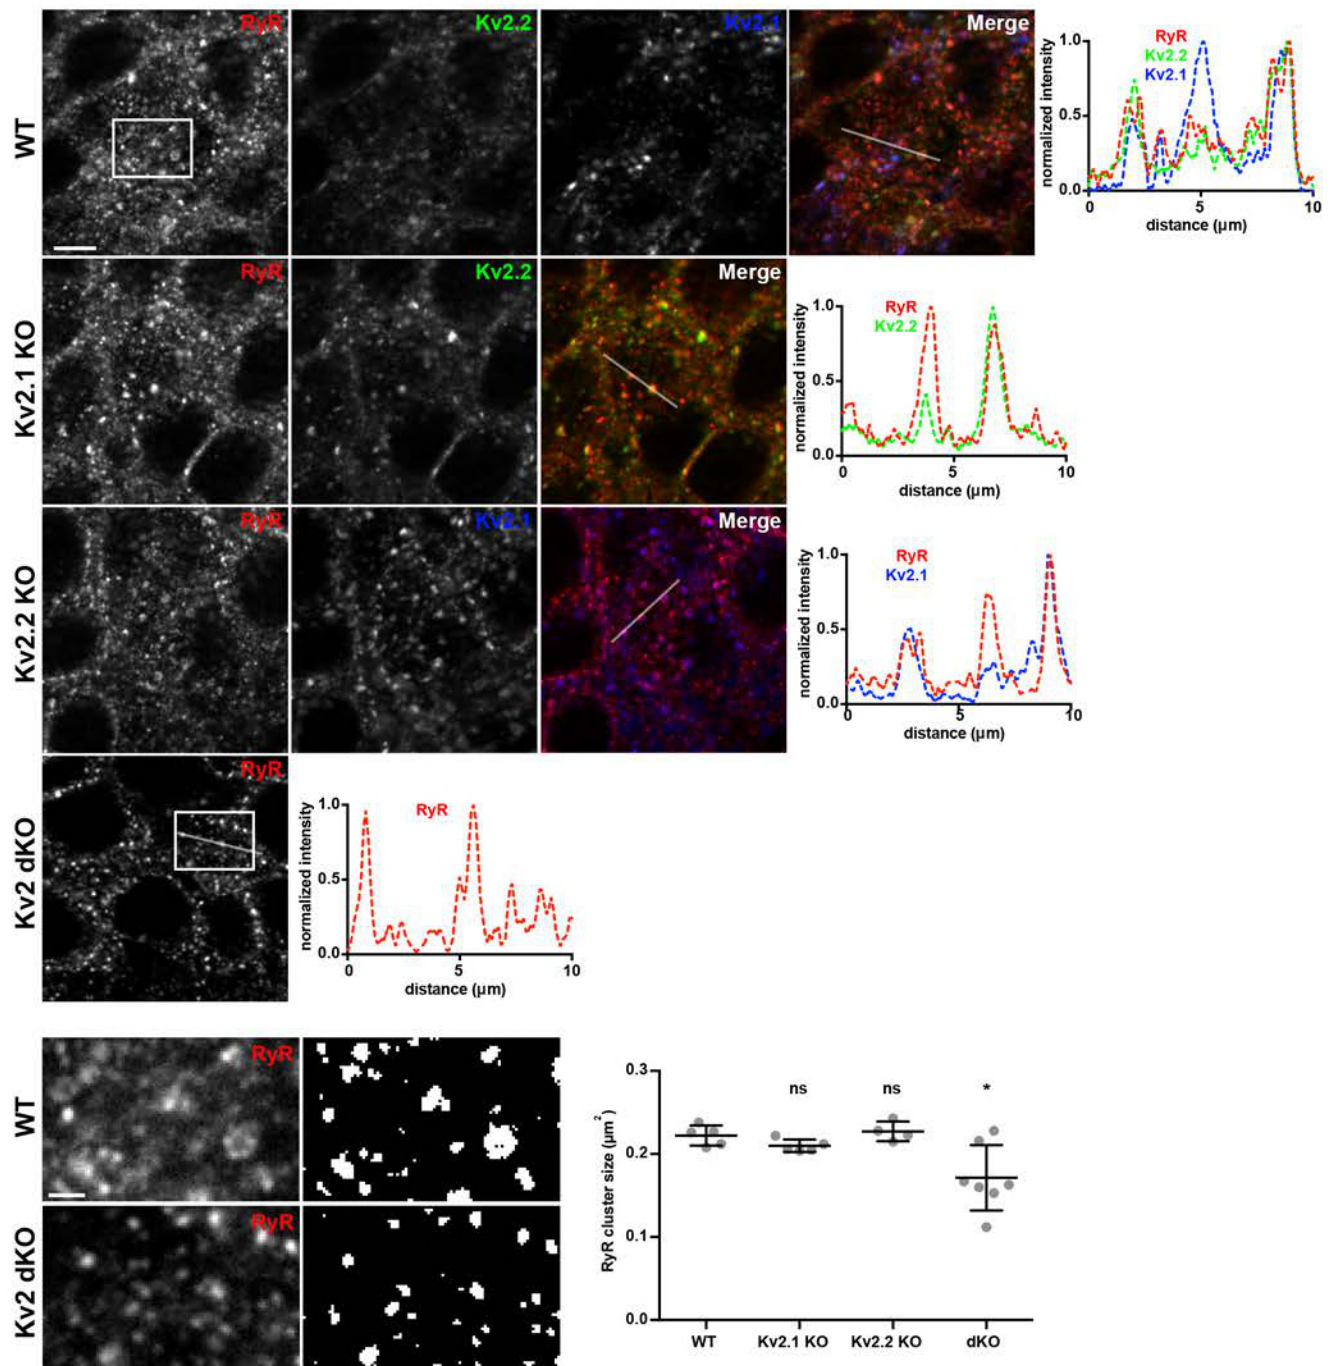

Figure 12
